# Supplementary material for: Guided optimization of ToxPi model weights using a Semi-Automated approach
Source: PubMed Central journal article supplement — Comput Toxicol. Author manuscript; Available in PMC 2024 Jun 13. (PMC11175362; doi:10.1016/j.comtox.2023.100294), 2023-12-09

## User Defined Model For Feature Data

|          | Slice 1<br>Weight = 0.5 |           | Slice 2<br>Weight = 0.2 | Slice 3<br>Weight = 0.3 |
|----------|-------------------------|-----------|-------------------------|-------------------------|
|          | Feature 1               | Feature 2 | Feature 3               | Feature 4               |
| Sample 1 | •                       | •         | ●                       | •                       |
| Sample 2 | ▲                       | ▲         | ▲                       | ▲                       |
| Sample 3 |                         | ■         | ■                       | ■                       |

### Aggregate Features Into Slices

|          | Slice 1 | Slice 2 | Slice 3 |
|----------|---------|---------|---------|
| Sample 1 | ●       | ●       | •       |
| Sample 2 | ▲       | ▲       | ▲       |
| Sample 3 | ■       | ■       | ■       |

### Rescale Slice Scores 0-1

|          | Slice 1 | Slice 2 | Slice 3 |
|----------|---------|---------|---------|
| Sample 1 | ●       | ●       | ■       |
| Sample 2 | ▲       | ▲       | ▲       |
| Sample 3 |         |         | ■       |

### Calculate Sample Scores

|          | Slice 1 | Slice 2 | Slice 3 | Score |
|----------|---------|---------|---------|-------|
| Sample 1 | ●       | ●       | ■       | ●     |
| Sample 2 | ▲       | ▲       | ▲       | ▲     |
| Sample 3 |         |         | ■       | ■     |

Sample 2  
Score = 0.95  
Rank = 1/3

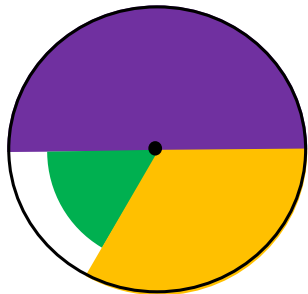

- Sample 2:
- Highest overall outcome
  - Highest Slice 1 association
  - Moderate Slice 2 association
  - Highest Slice 3 association
  - Highest prioritized sample driven by all features

Sample 1  
Score = 0.45  
Rank = 2/3

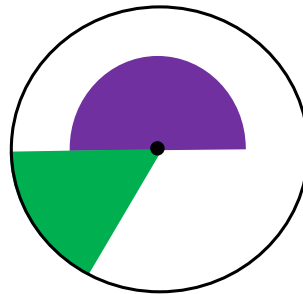

- Sample 1:
- Moderate overall outcome
  - Moderate Slice 1 association
  - Highest Slice 2 association
  - Lowest Slice 3 association
  - Moderately prioritized sample driven largely by Slice 2 features

Sample 3  
Score = 0.25  
Rank = 3/3

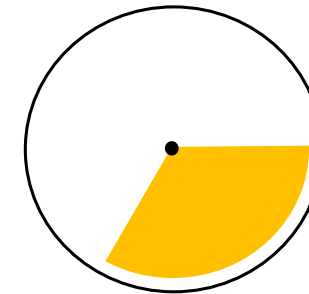

- Sample 3:
- Lowest overall outcome
  - Lowest Slice 1 association
  - Lowest Slice 2 association
  - High Slice 3 association
  - Lowly prioritized sample, special concerns for Slice 3 features

Feature Data

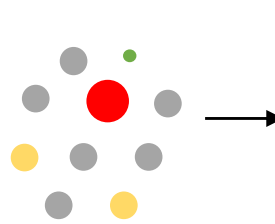

Ordinal Regression

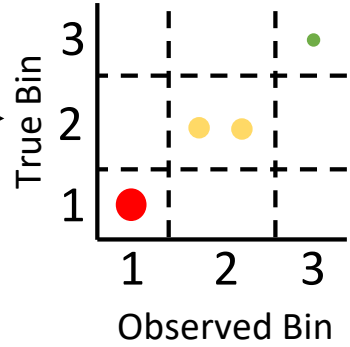

Including Unknowns

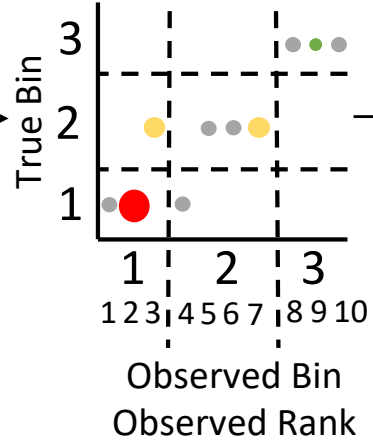

Genetic Algorithm

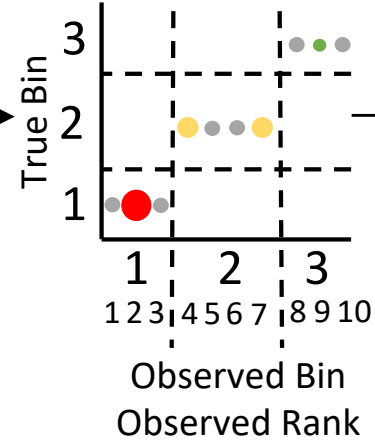

Final Ranking

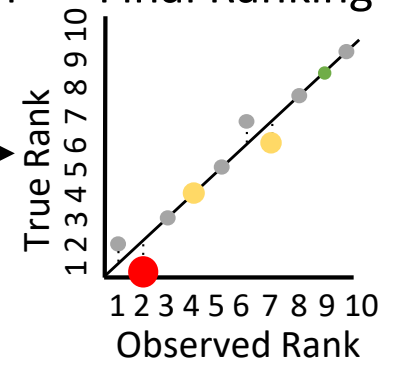

Combination 1:  
3 Slices, 3 Knowns/Slice, 500 Samples, 2 Bins

Combination 2:  
6 Slices, 3 Knowns/Slice, 1000 Samples, 3 Bins

ToxPi Profile Layout

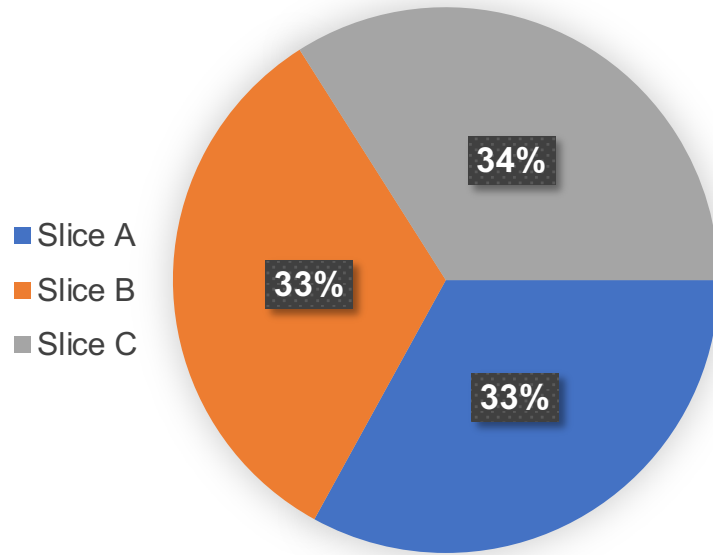

Data Layout

Known Samples    Unknown Samples    Total Samples

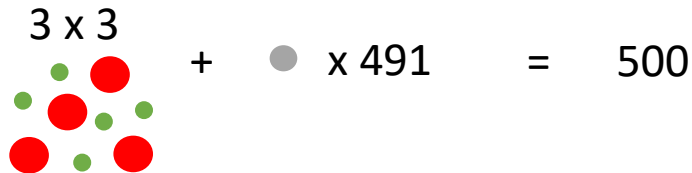

ToxPi Profile Layout

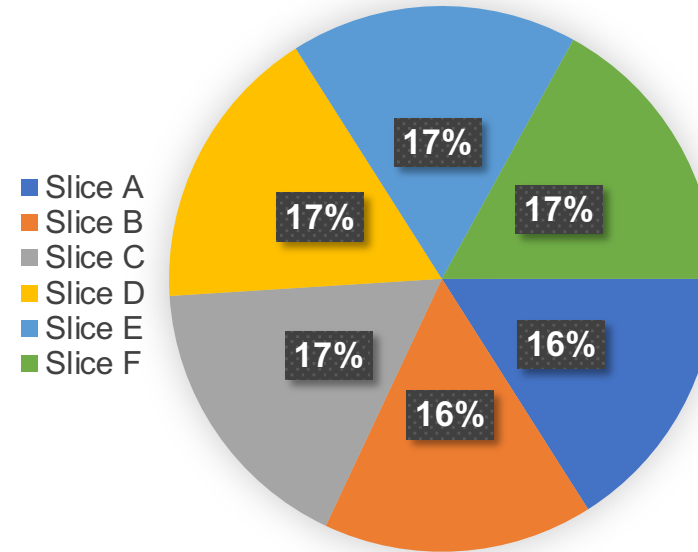

Data Layout

Known Samples    Unknown Samples    Total Samples

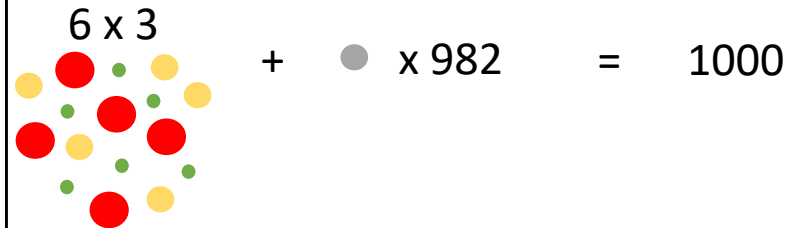

|               |               |                       |         |                               |
|---------------|---------------|-----------------------|---------|-------------------------------|
| Slices:       | Knowns/Slice: | Total Samples:        | Bins:   | Underlying Data Distribution: |
| {3,6,9,12,15} | {3,6,9,12,15} | {500,1000,5000,10000} | {2,3,4} | {Normal, Gamma, Beta, Mixed}  |

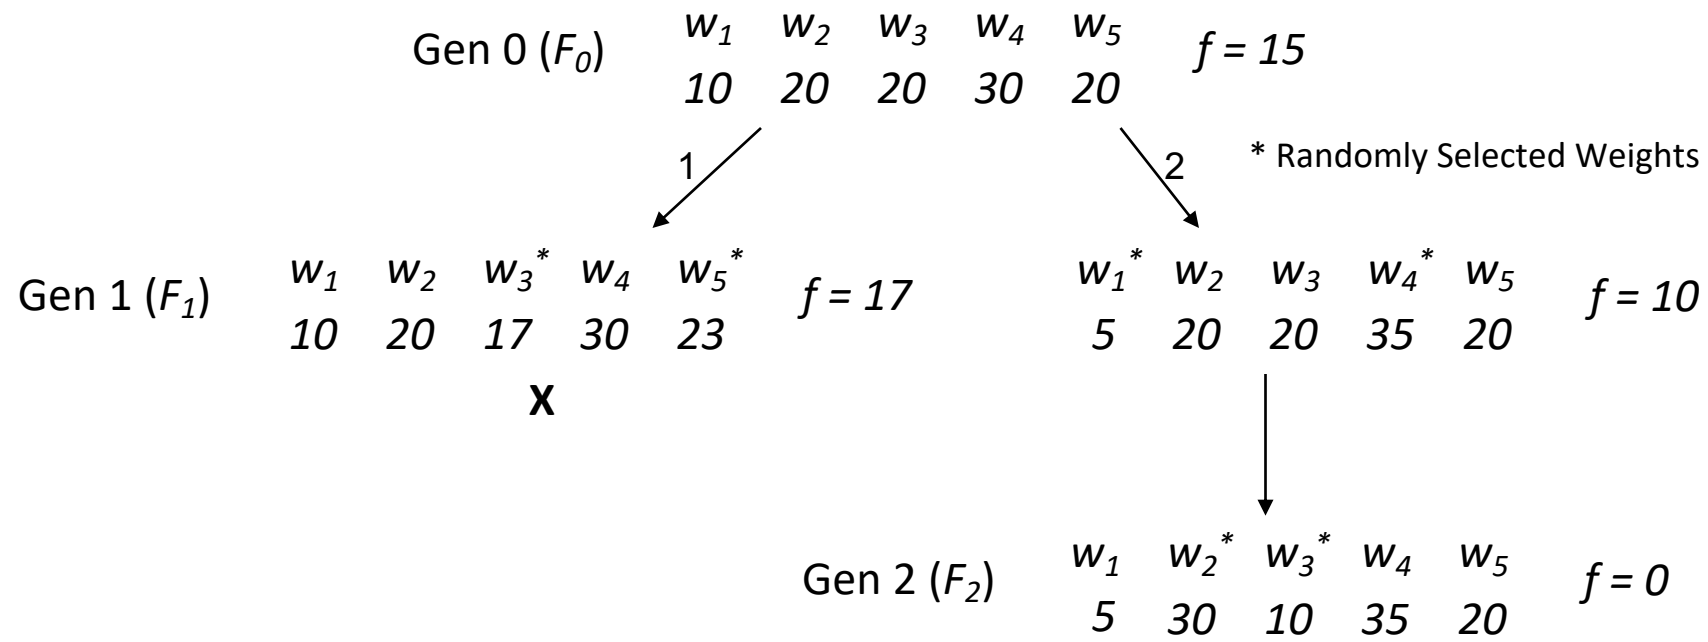

Final  $w = \{5, 30, 10, 35, 20\}$

Ordinal Weights

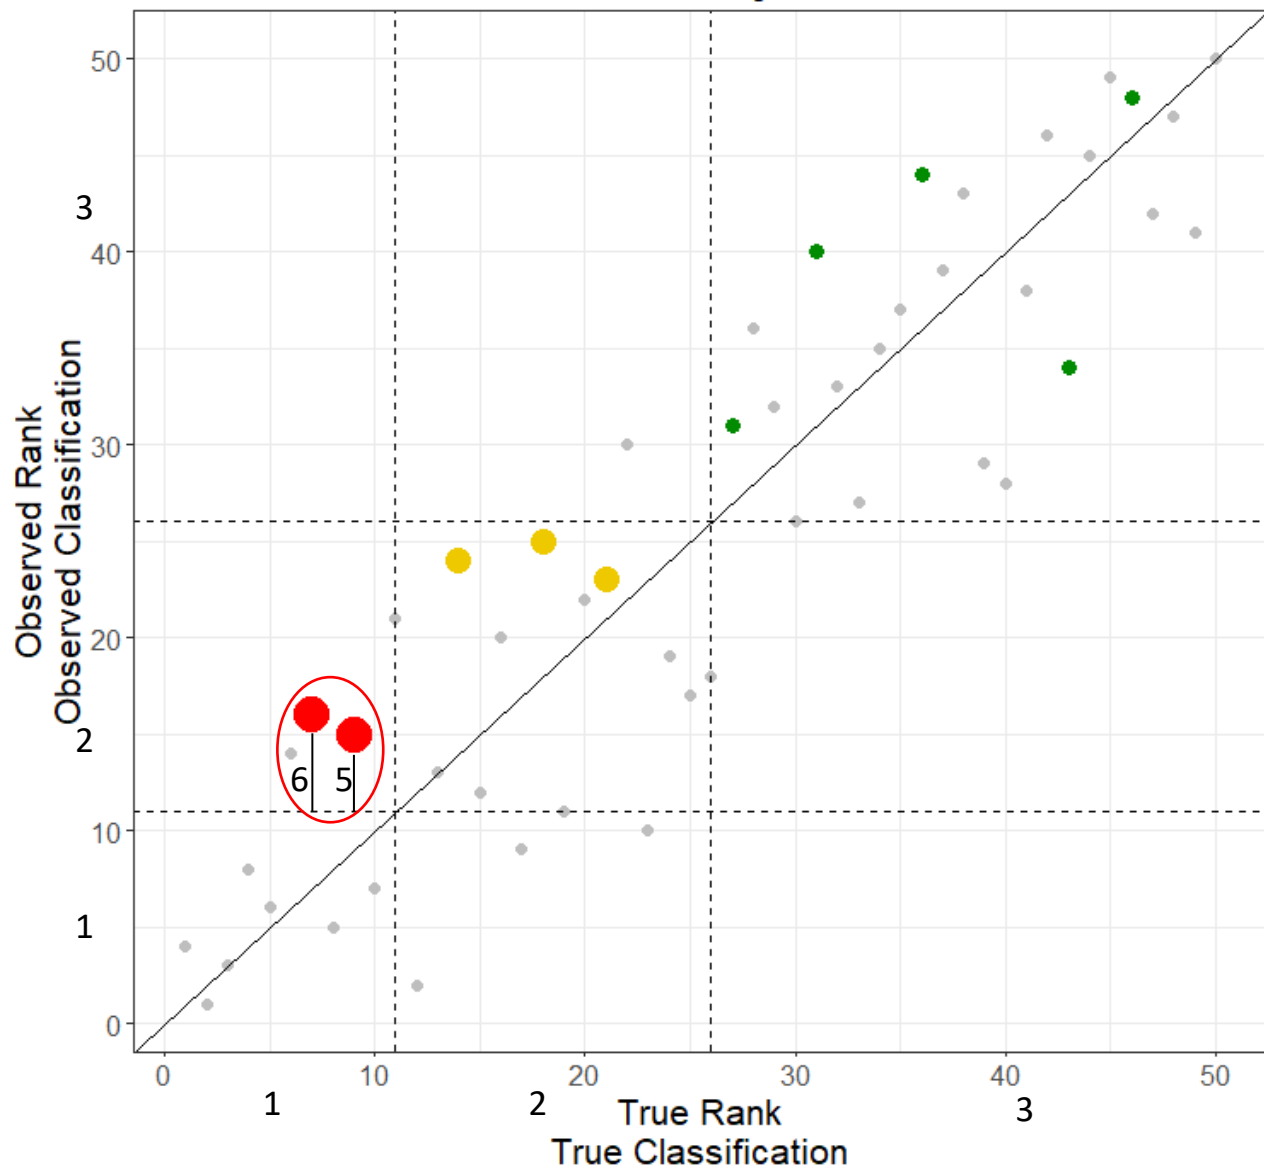

$$f = (2 - 1) * 6 + (2 - 1) * 5 = 11$$

GA Weights

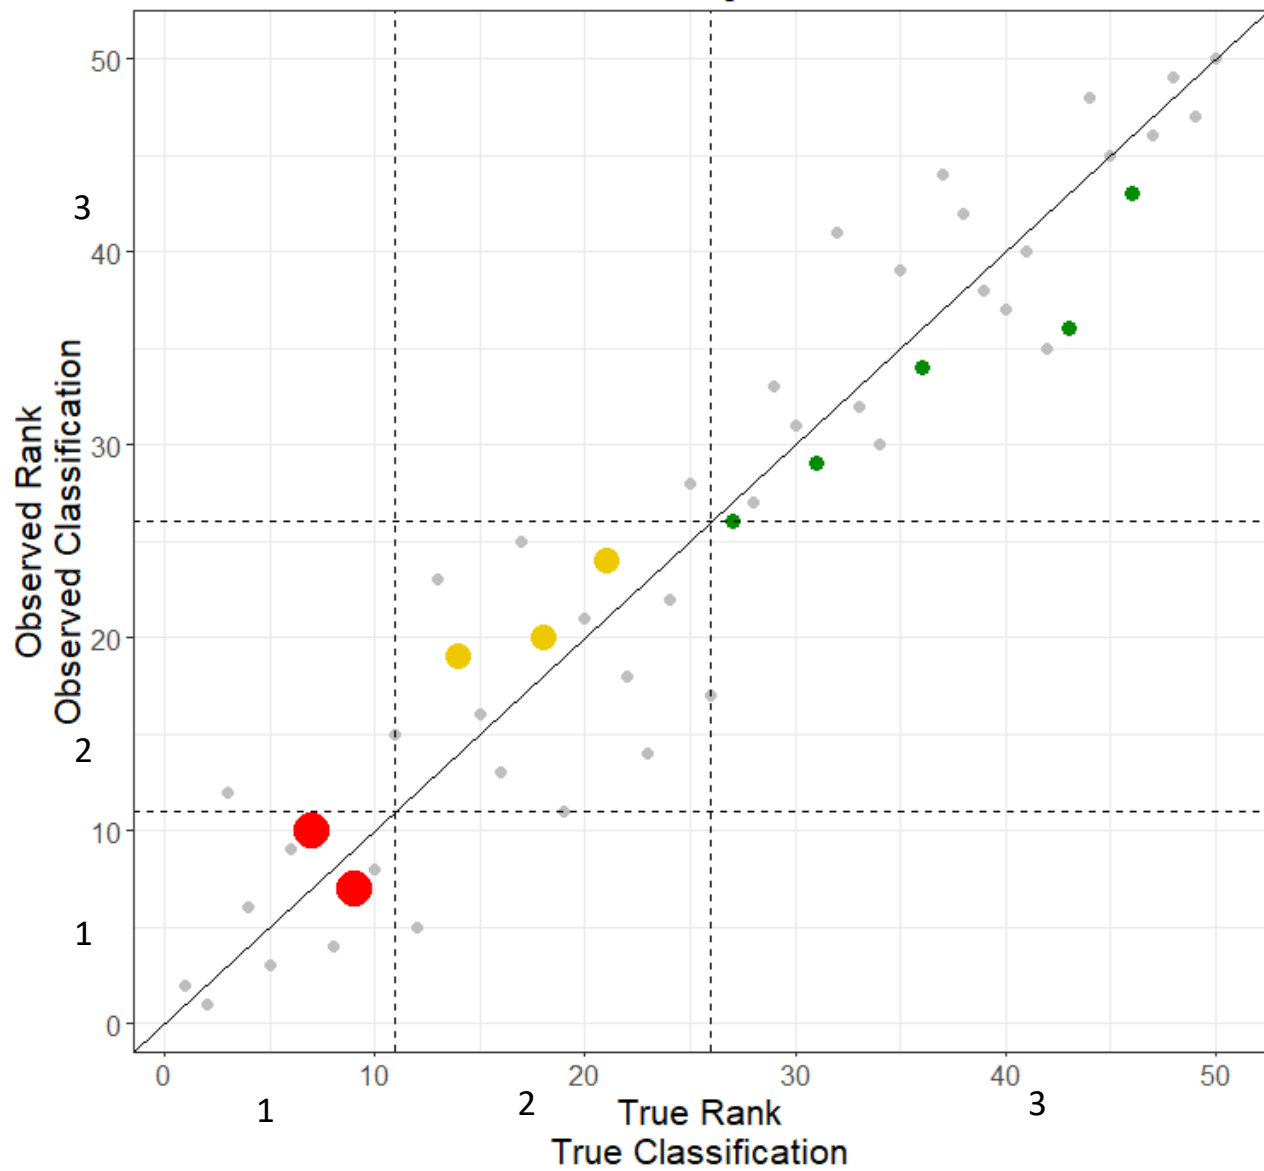

$$f = 0$$

# PAC Data ToxPi Profile

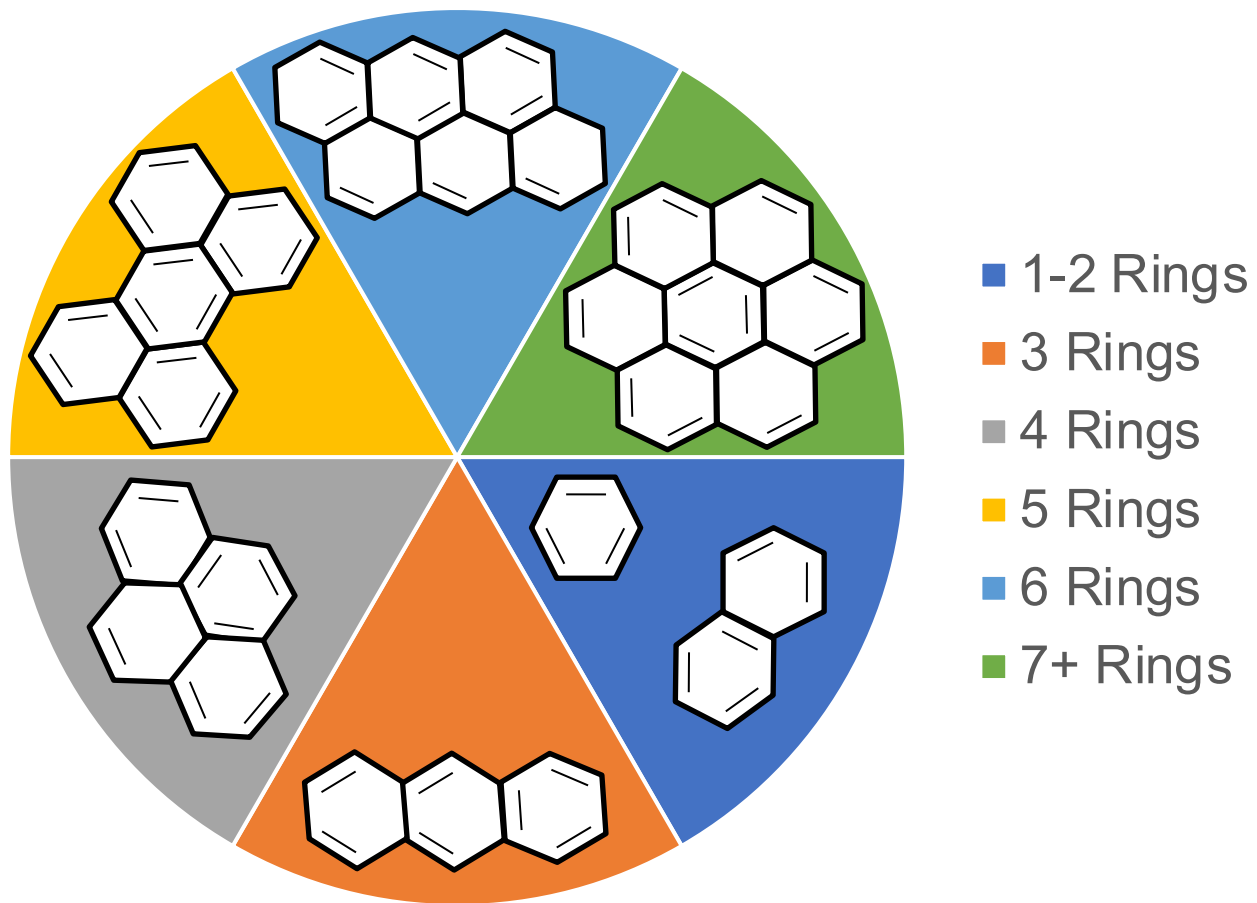

1A: # of Successful Convergences

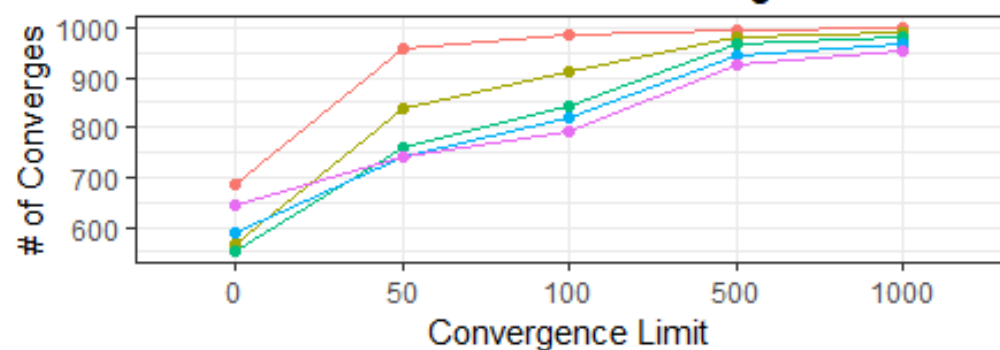

1B: Average Change in Run Time

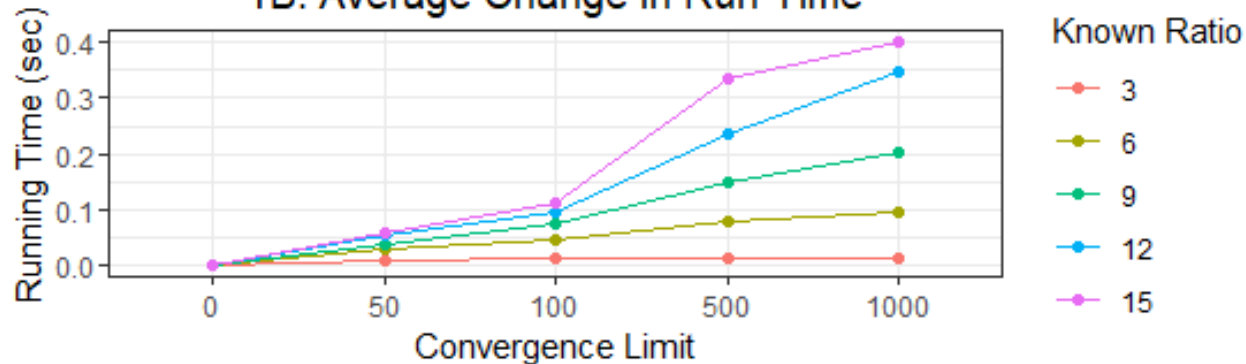

2A: # of Successful Convergences

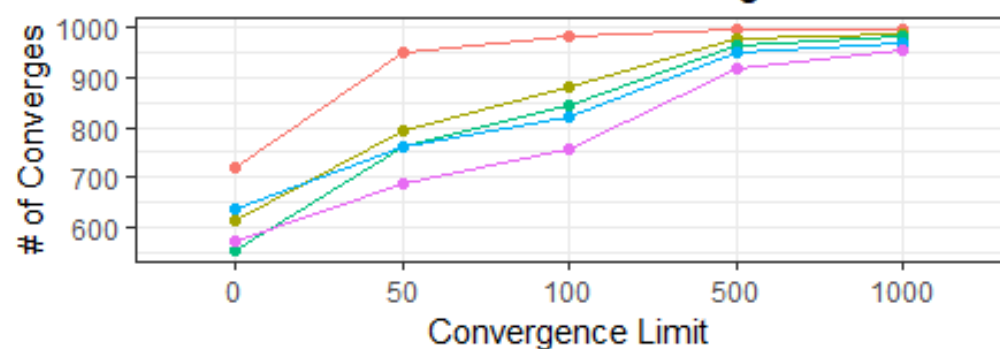

2B: Average Change in Run Time

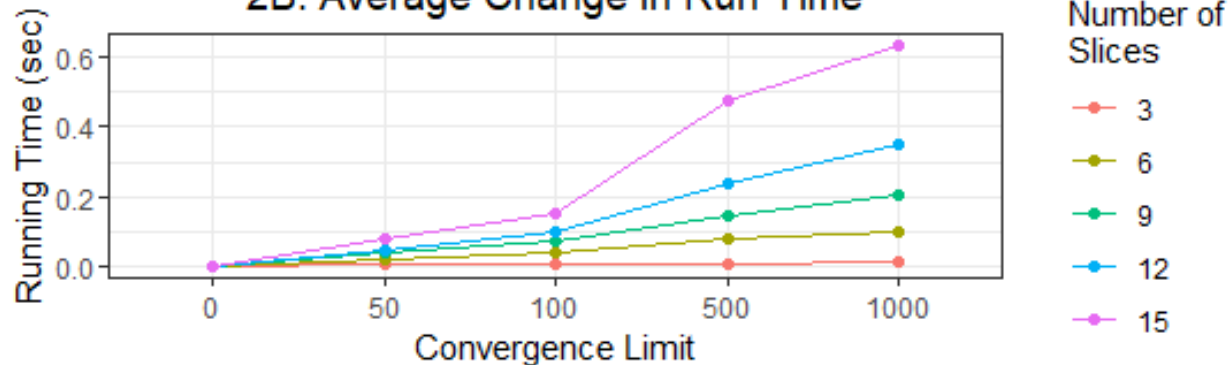

3A: # of Successful Convergences

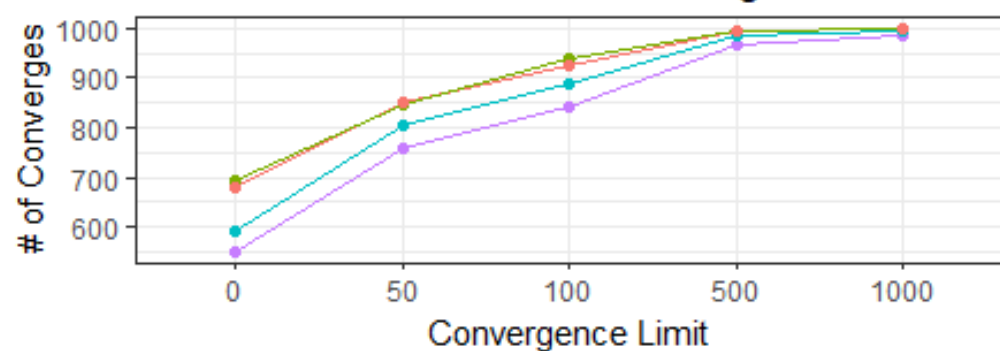

3B: Average Change in Run Time

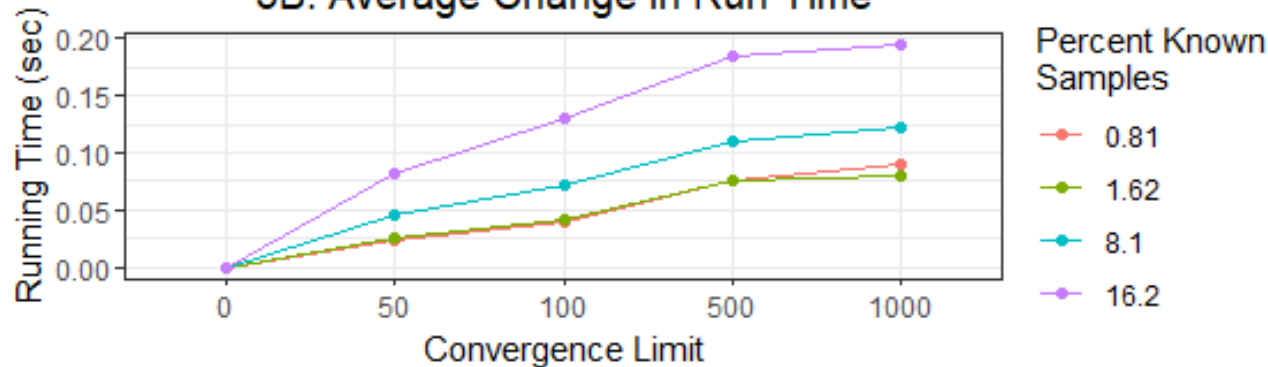

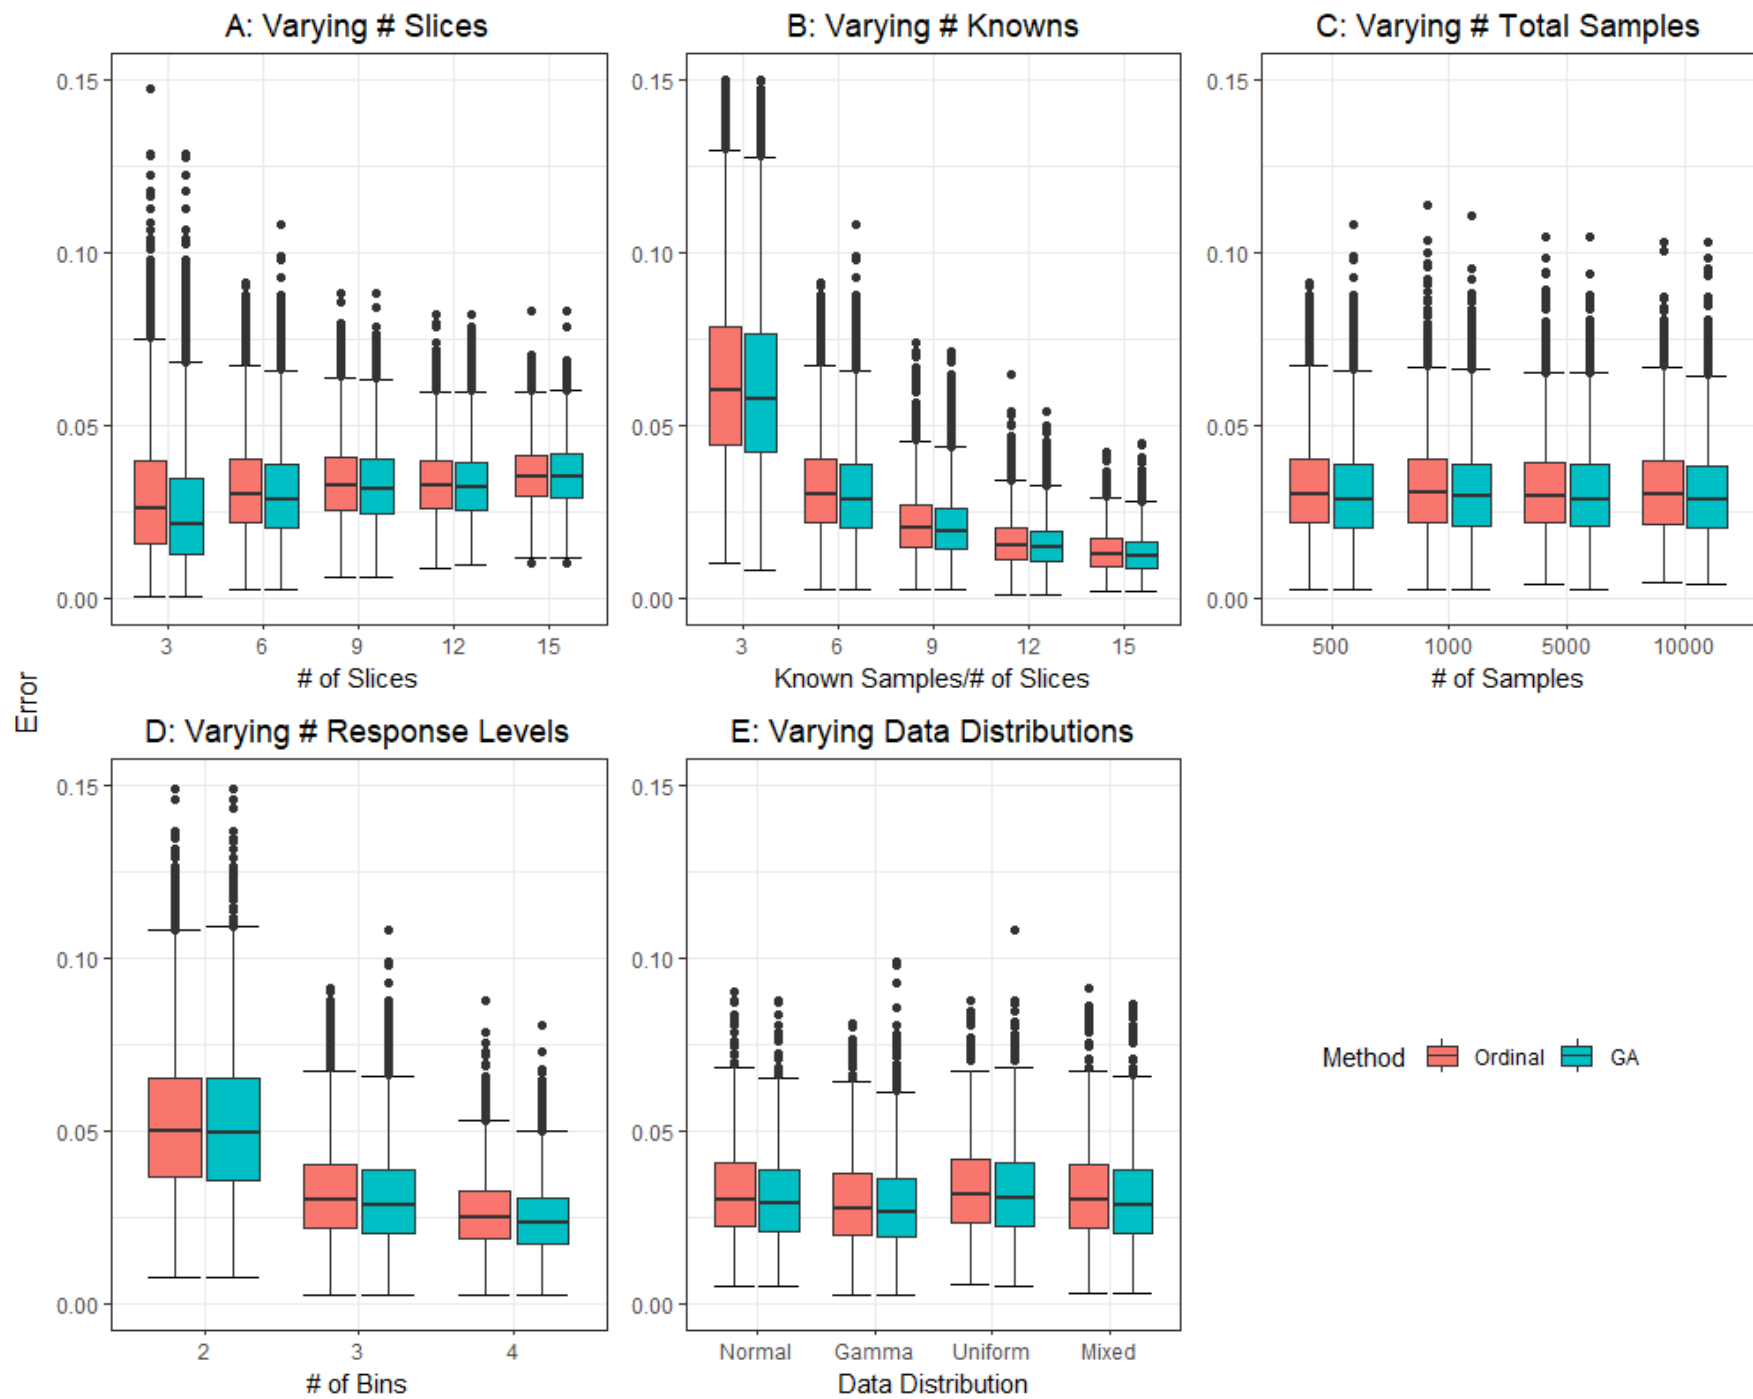



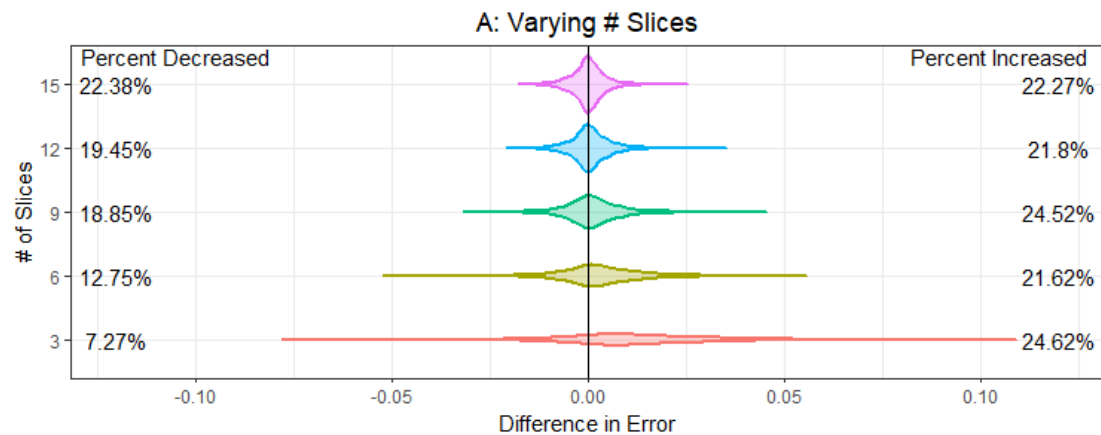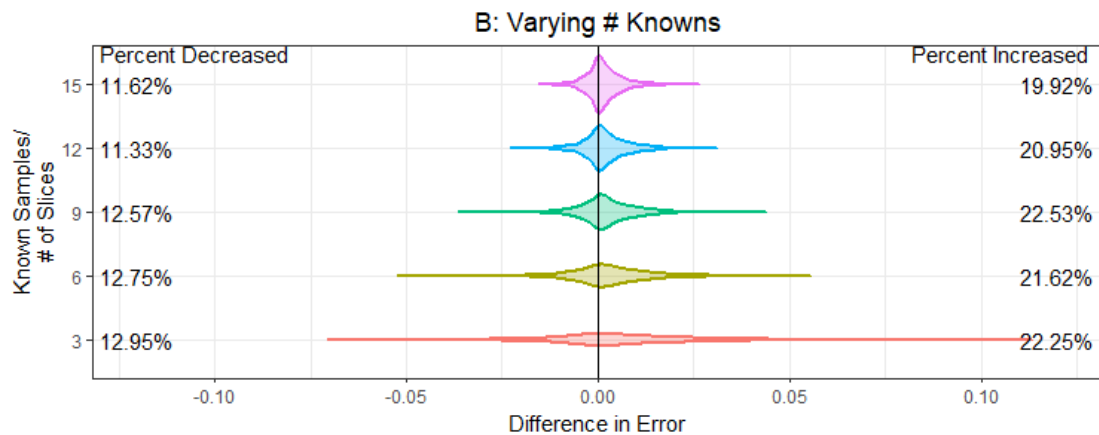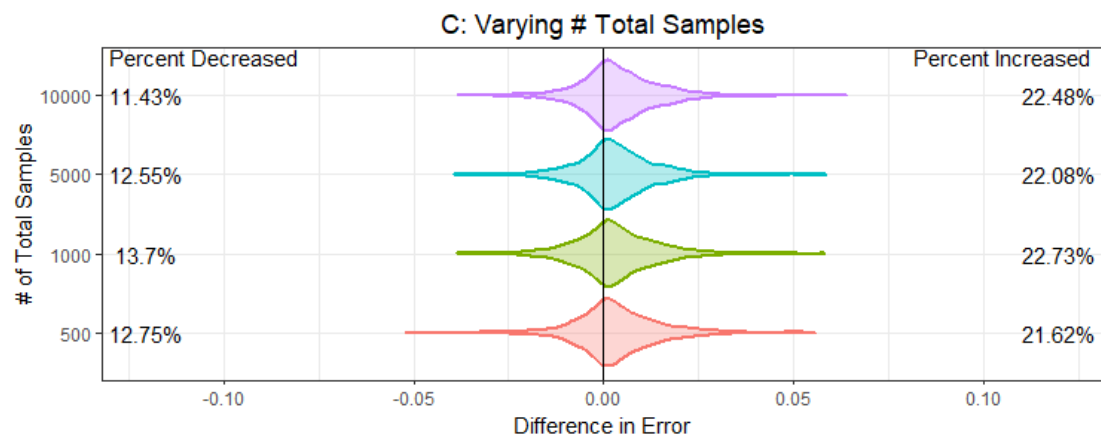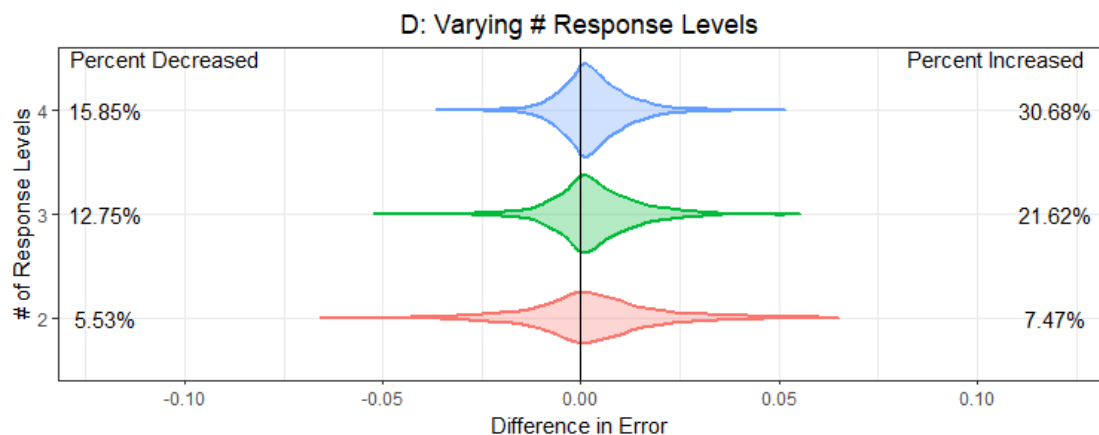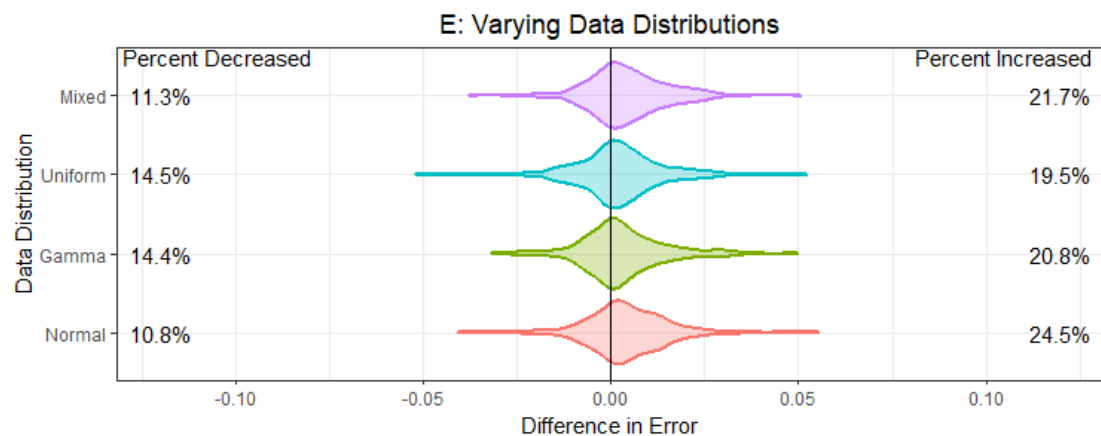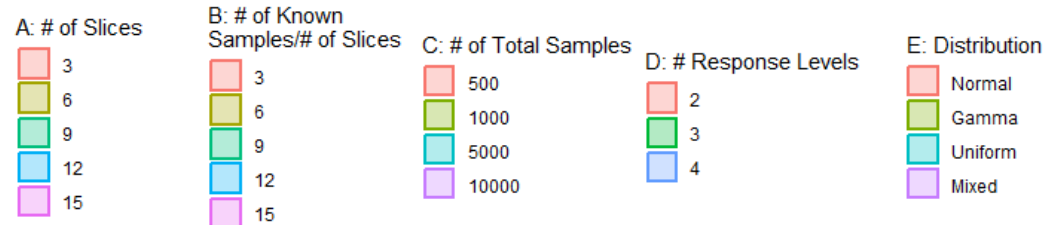

Correlation Plot For QC Assay vs PAC Data Rank: Ordinal Regression vs GA

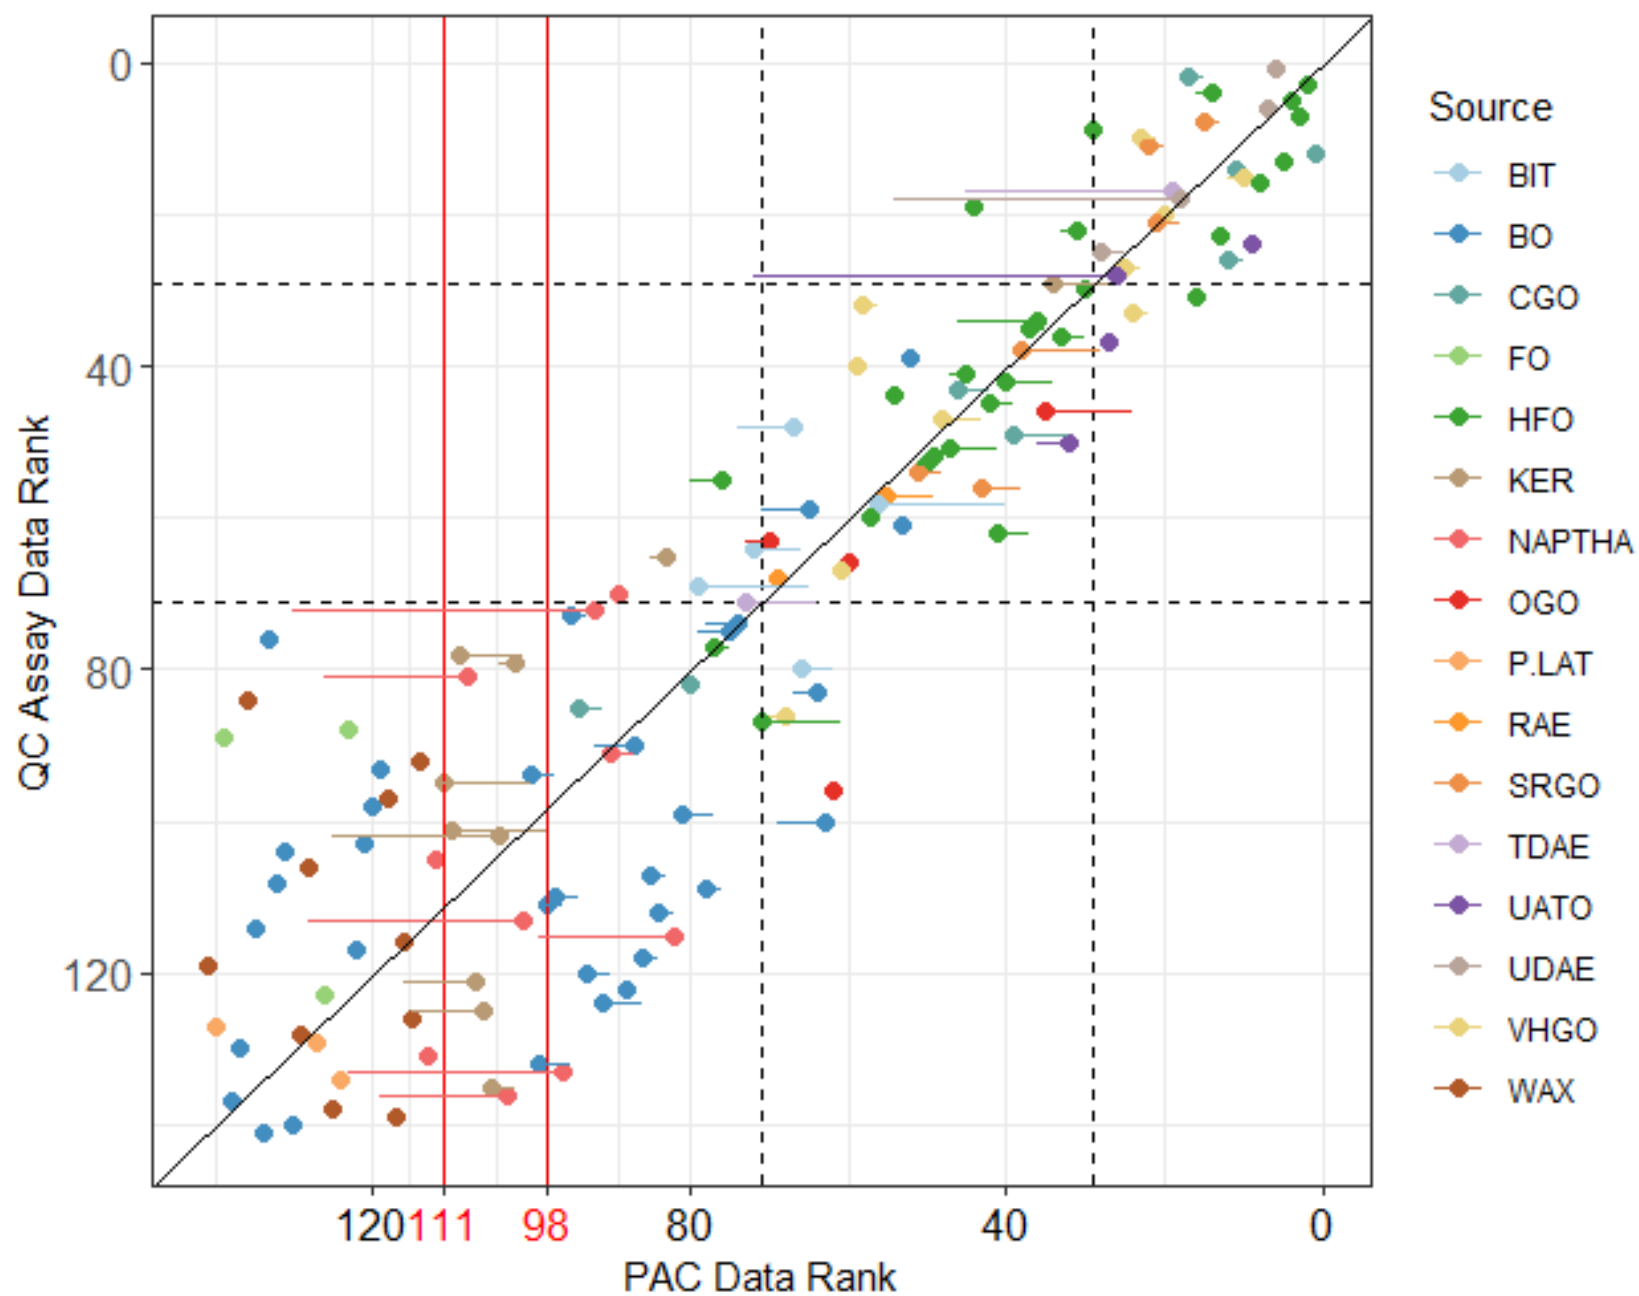

Supplement: NIHMS1954597-supplement-1.pdf [file NIHMS1954597-supplement-1.pdf]
