# Supplementary material for: Guided optimization of ToxPi model weights using a Semi-Automated approach
Source: PubMed Central journal article supplement — Comput Toxicol. Author manuscript; Available in PMC 2024 Jun 13. (PMC11175362; doi:10.1016/j.comtox.2023.100294), 2023-12-09

2 Response Levels, 500 Total Samples

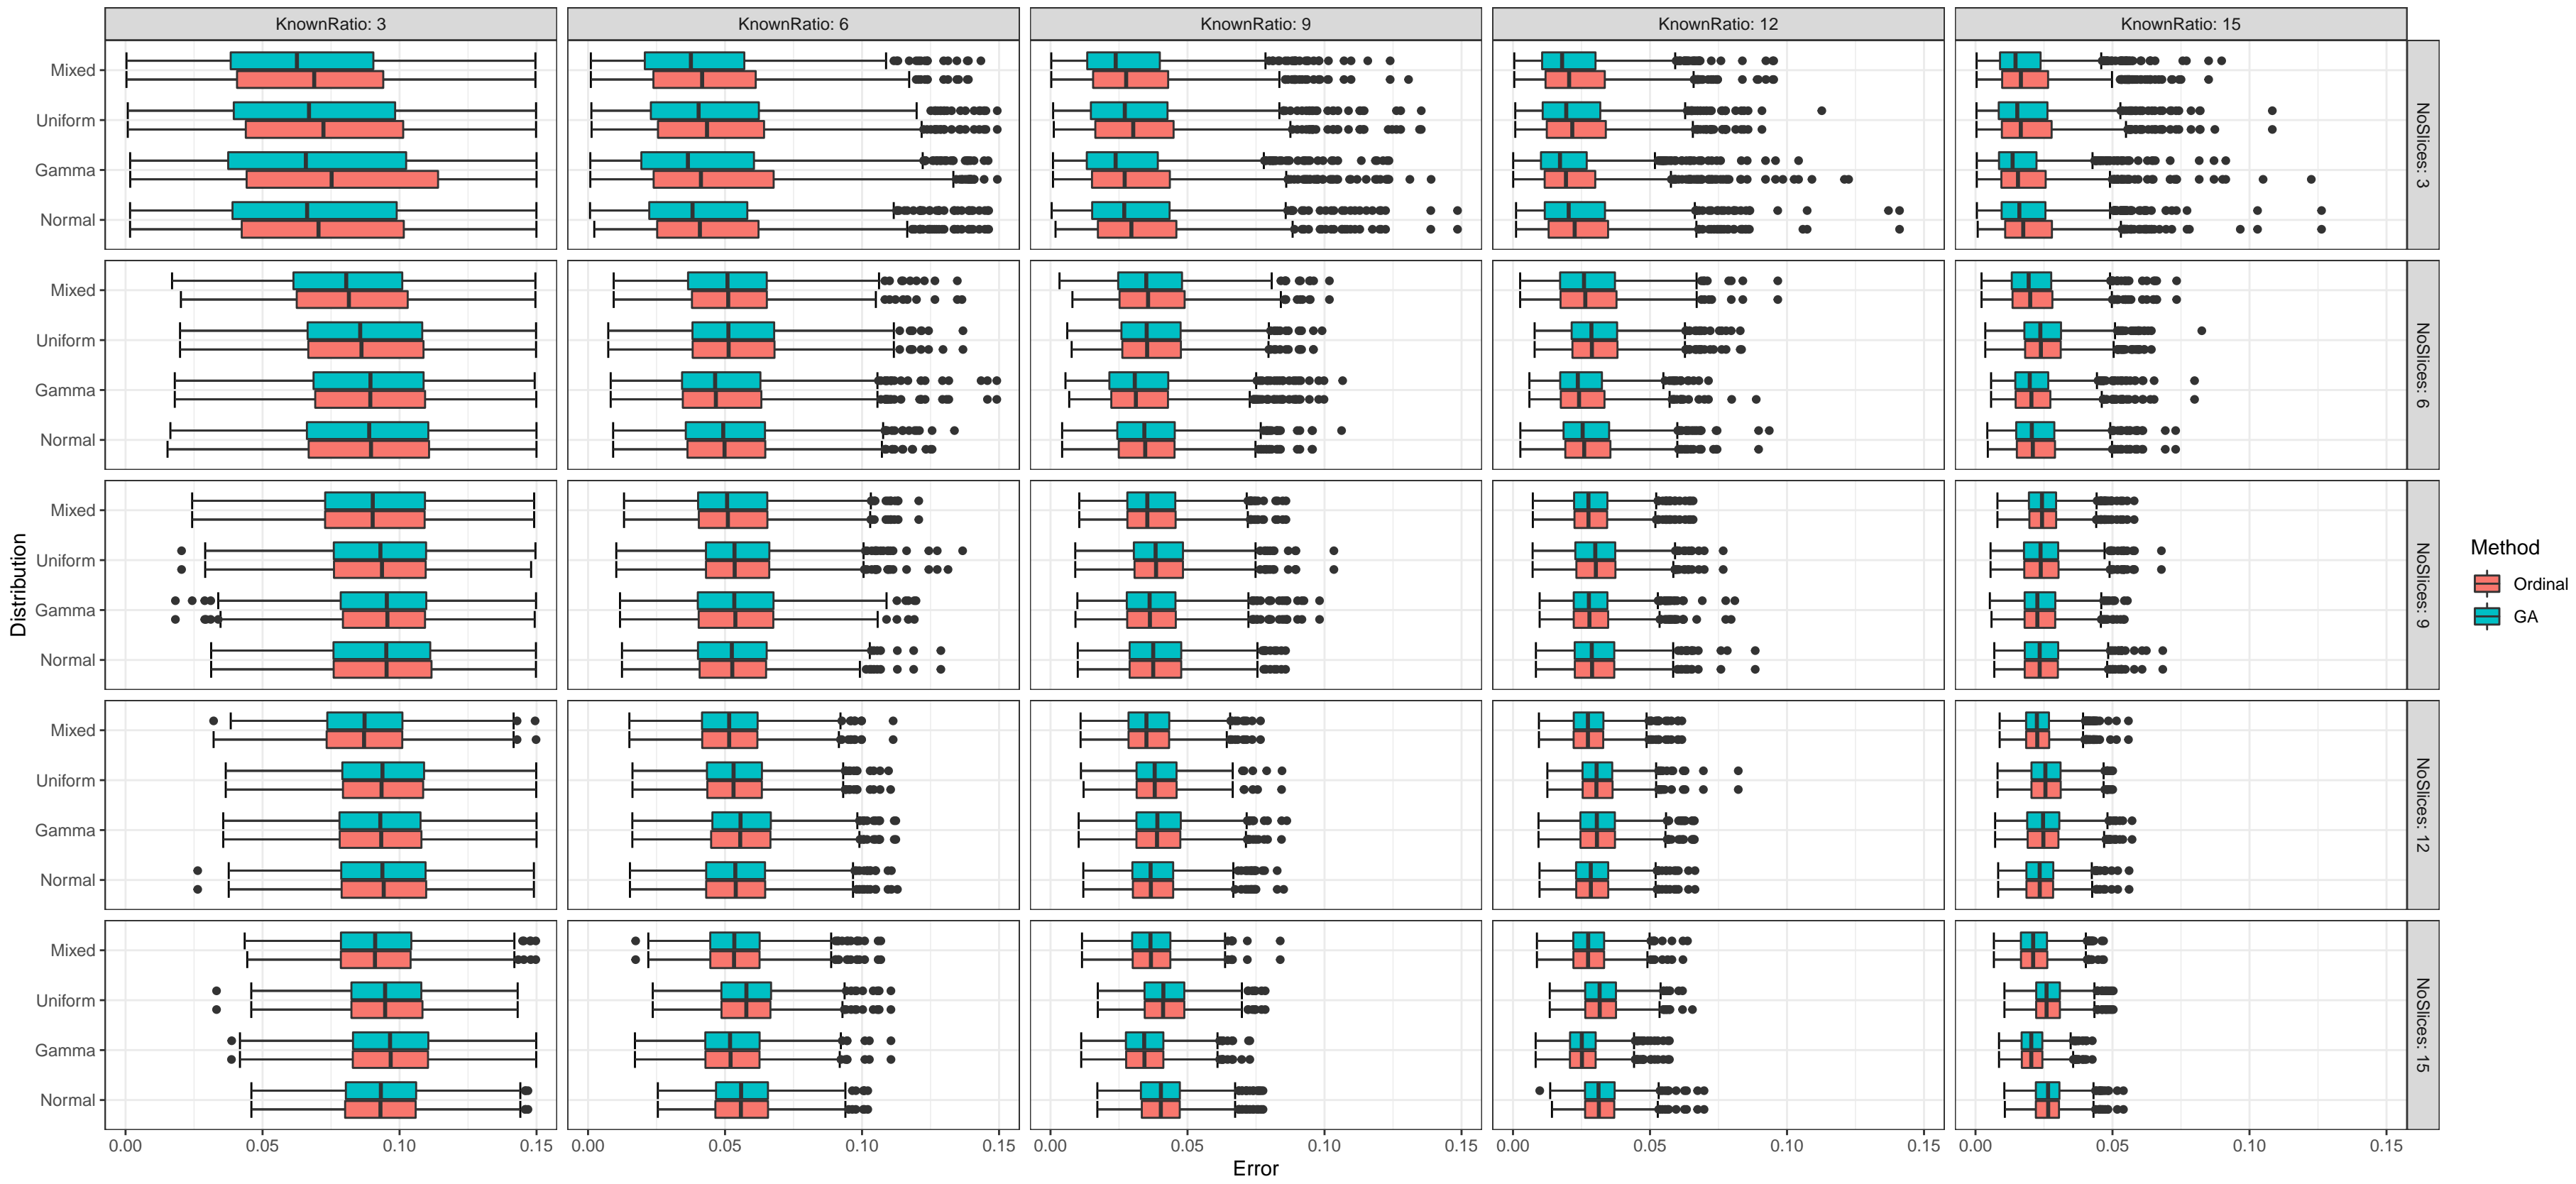

## 2 Response Levels, 500 Total Samples

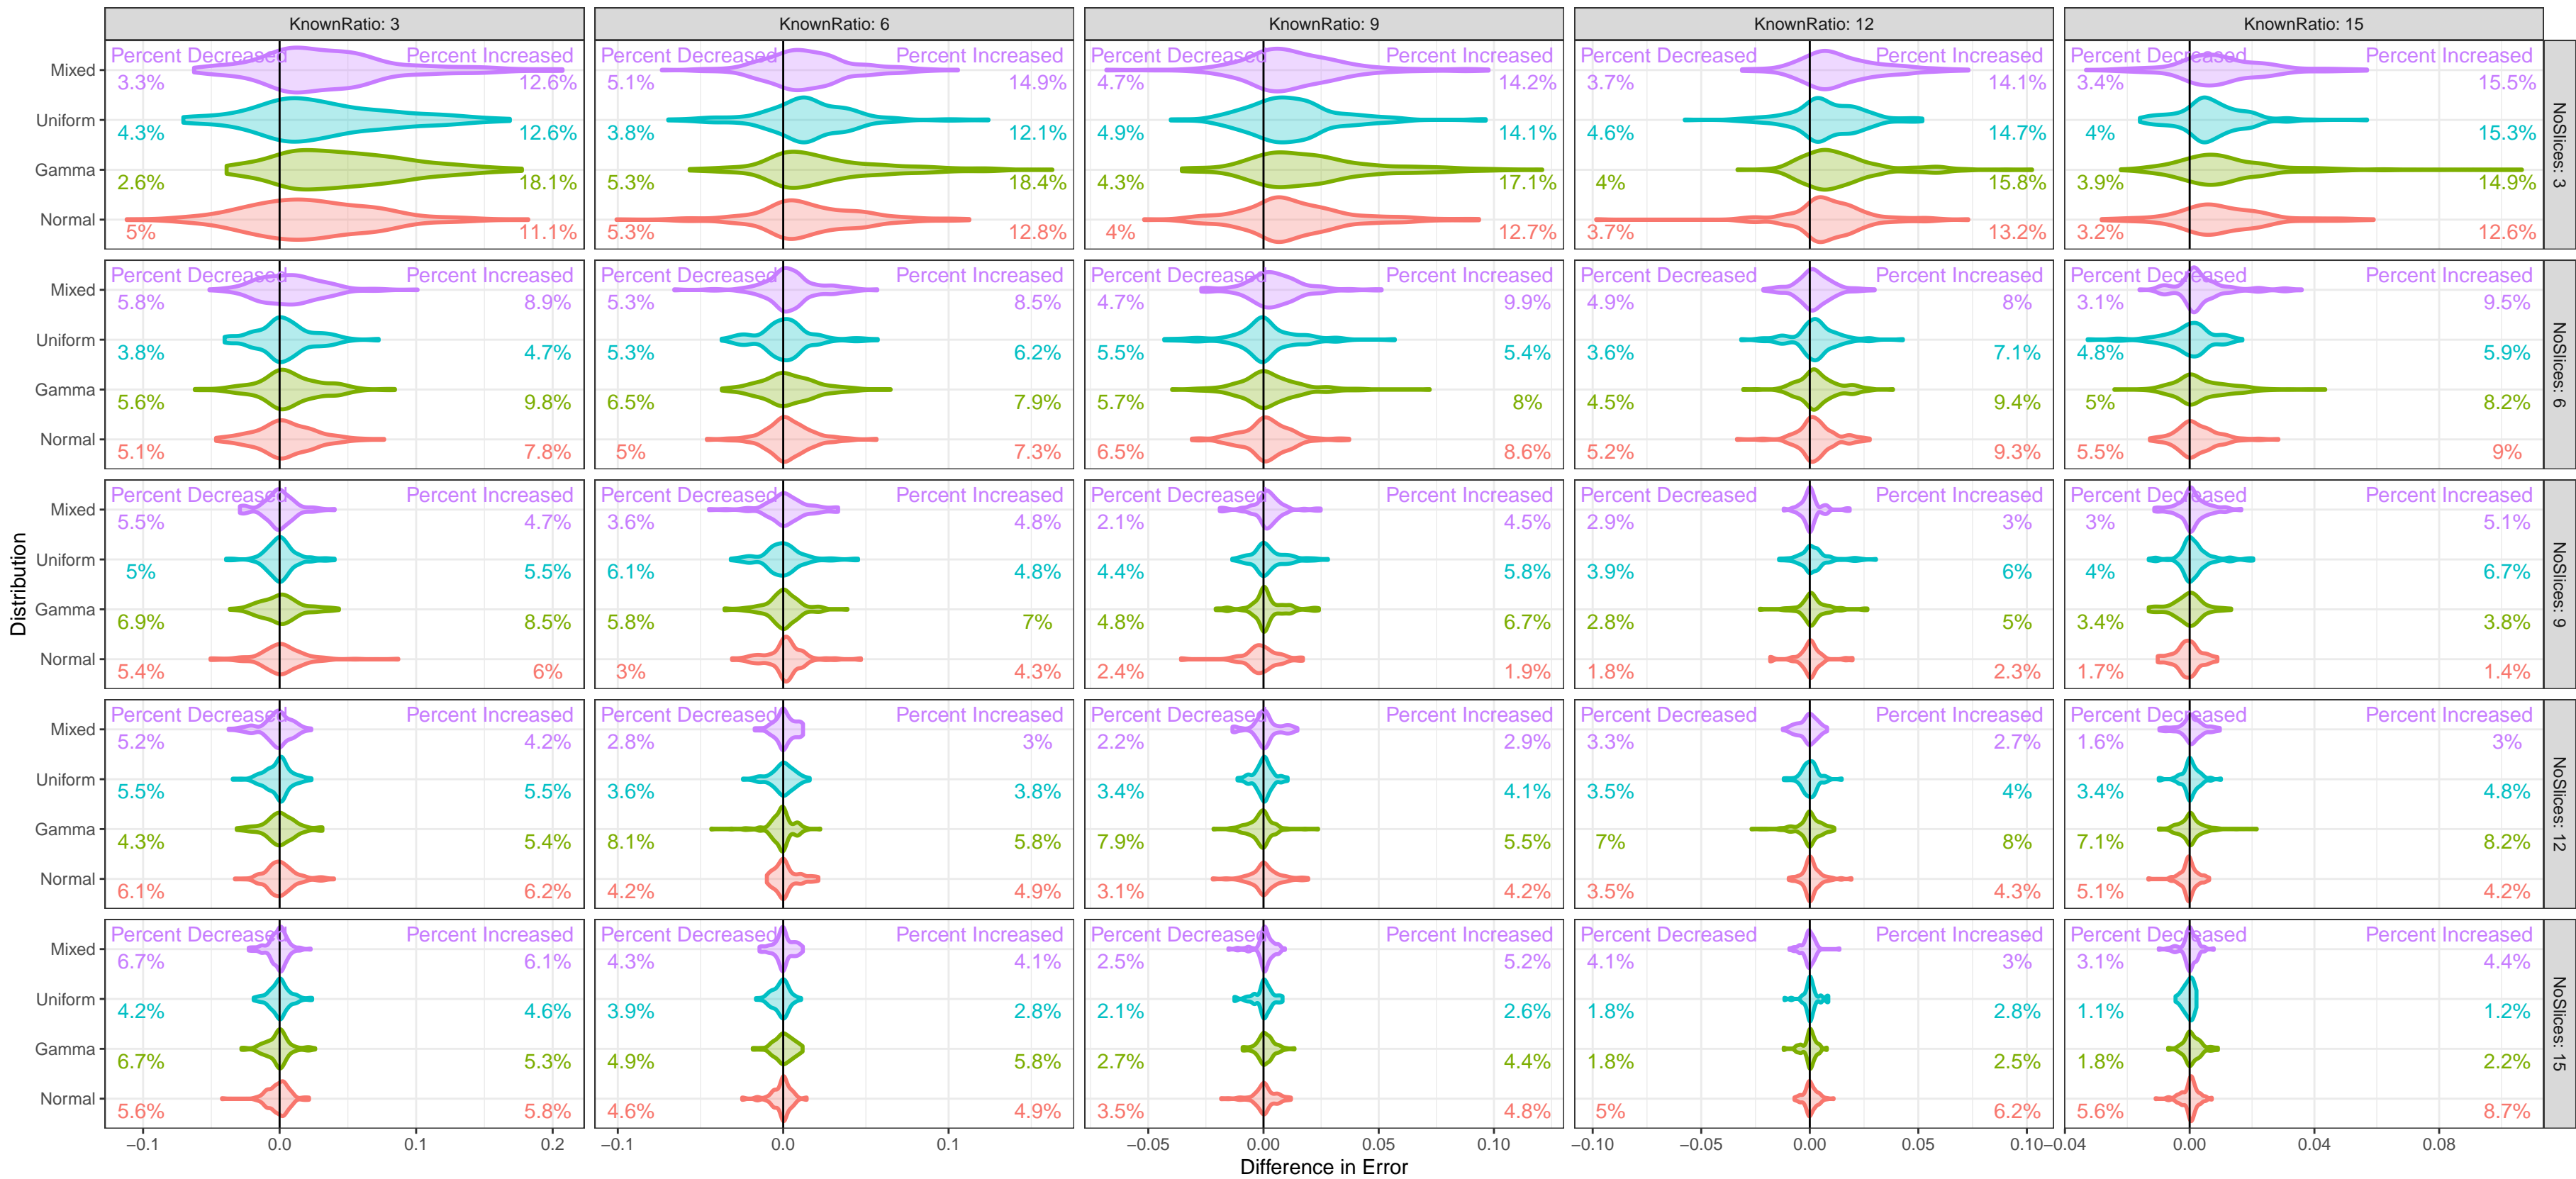

3 Response Levels, 500 Total Samples

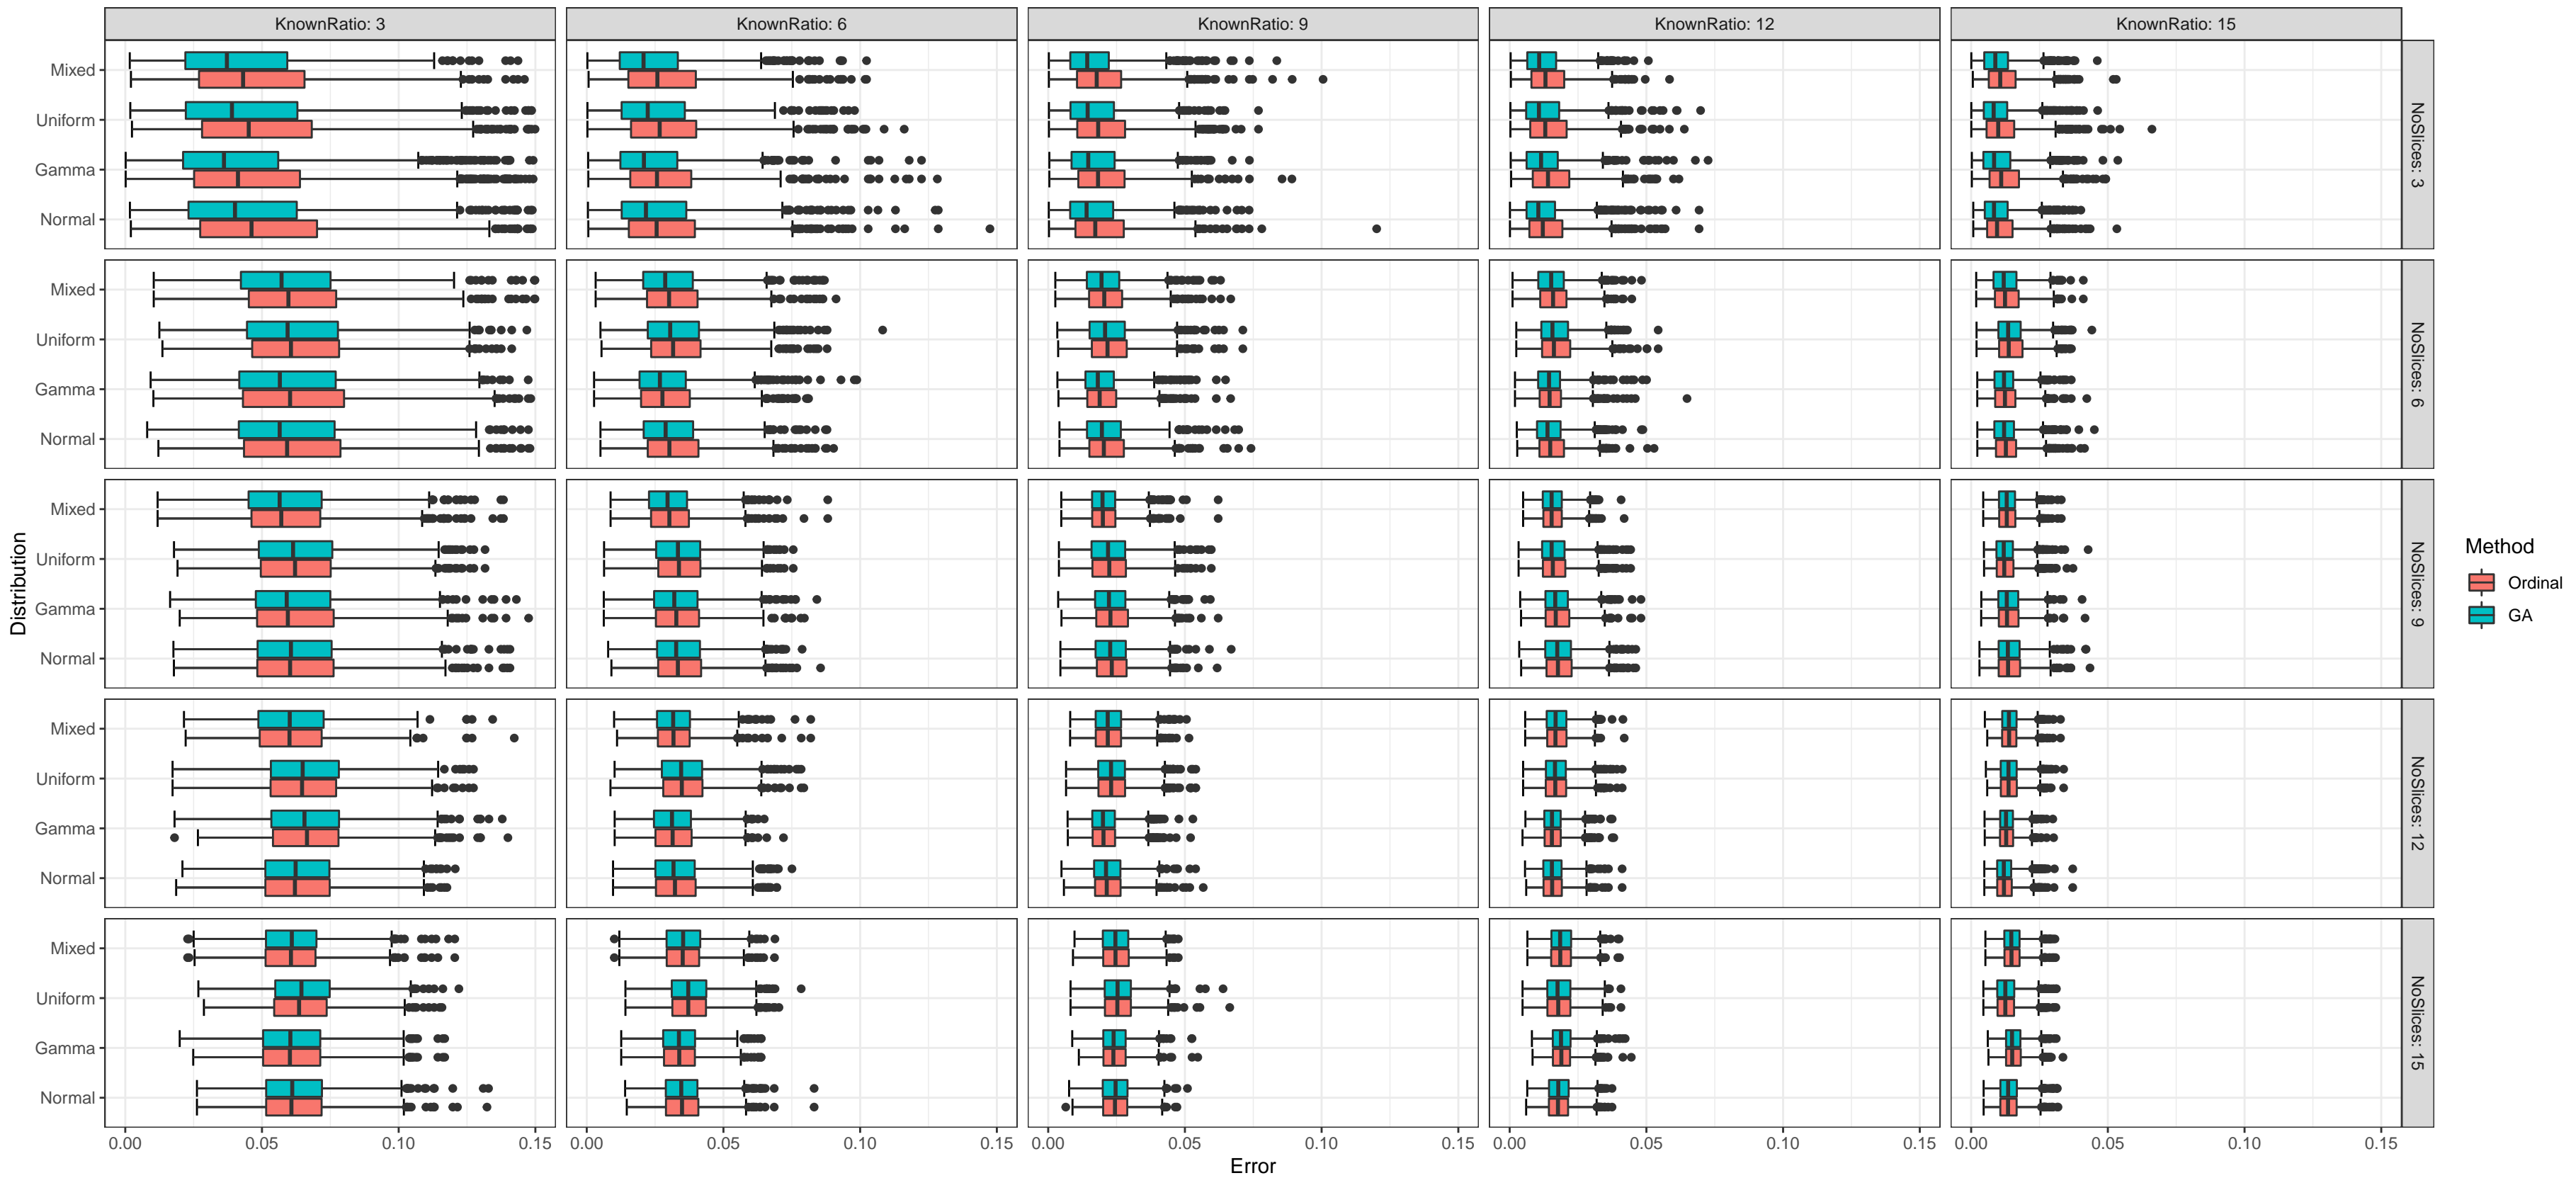

### 3 Response Levels, 500 Total Samples

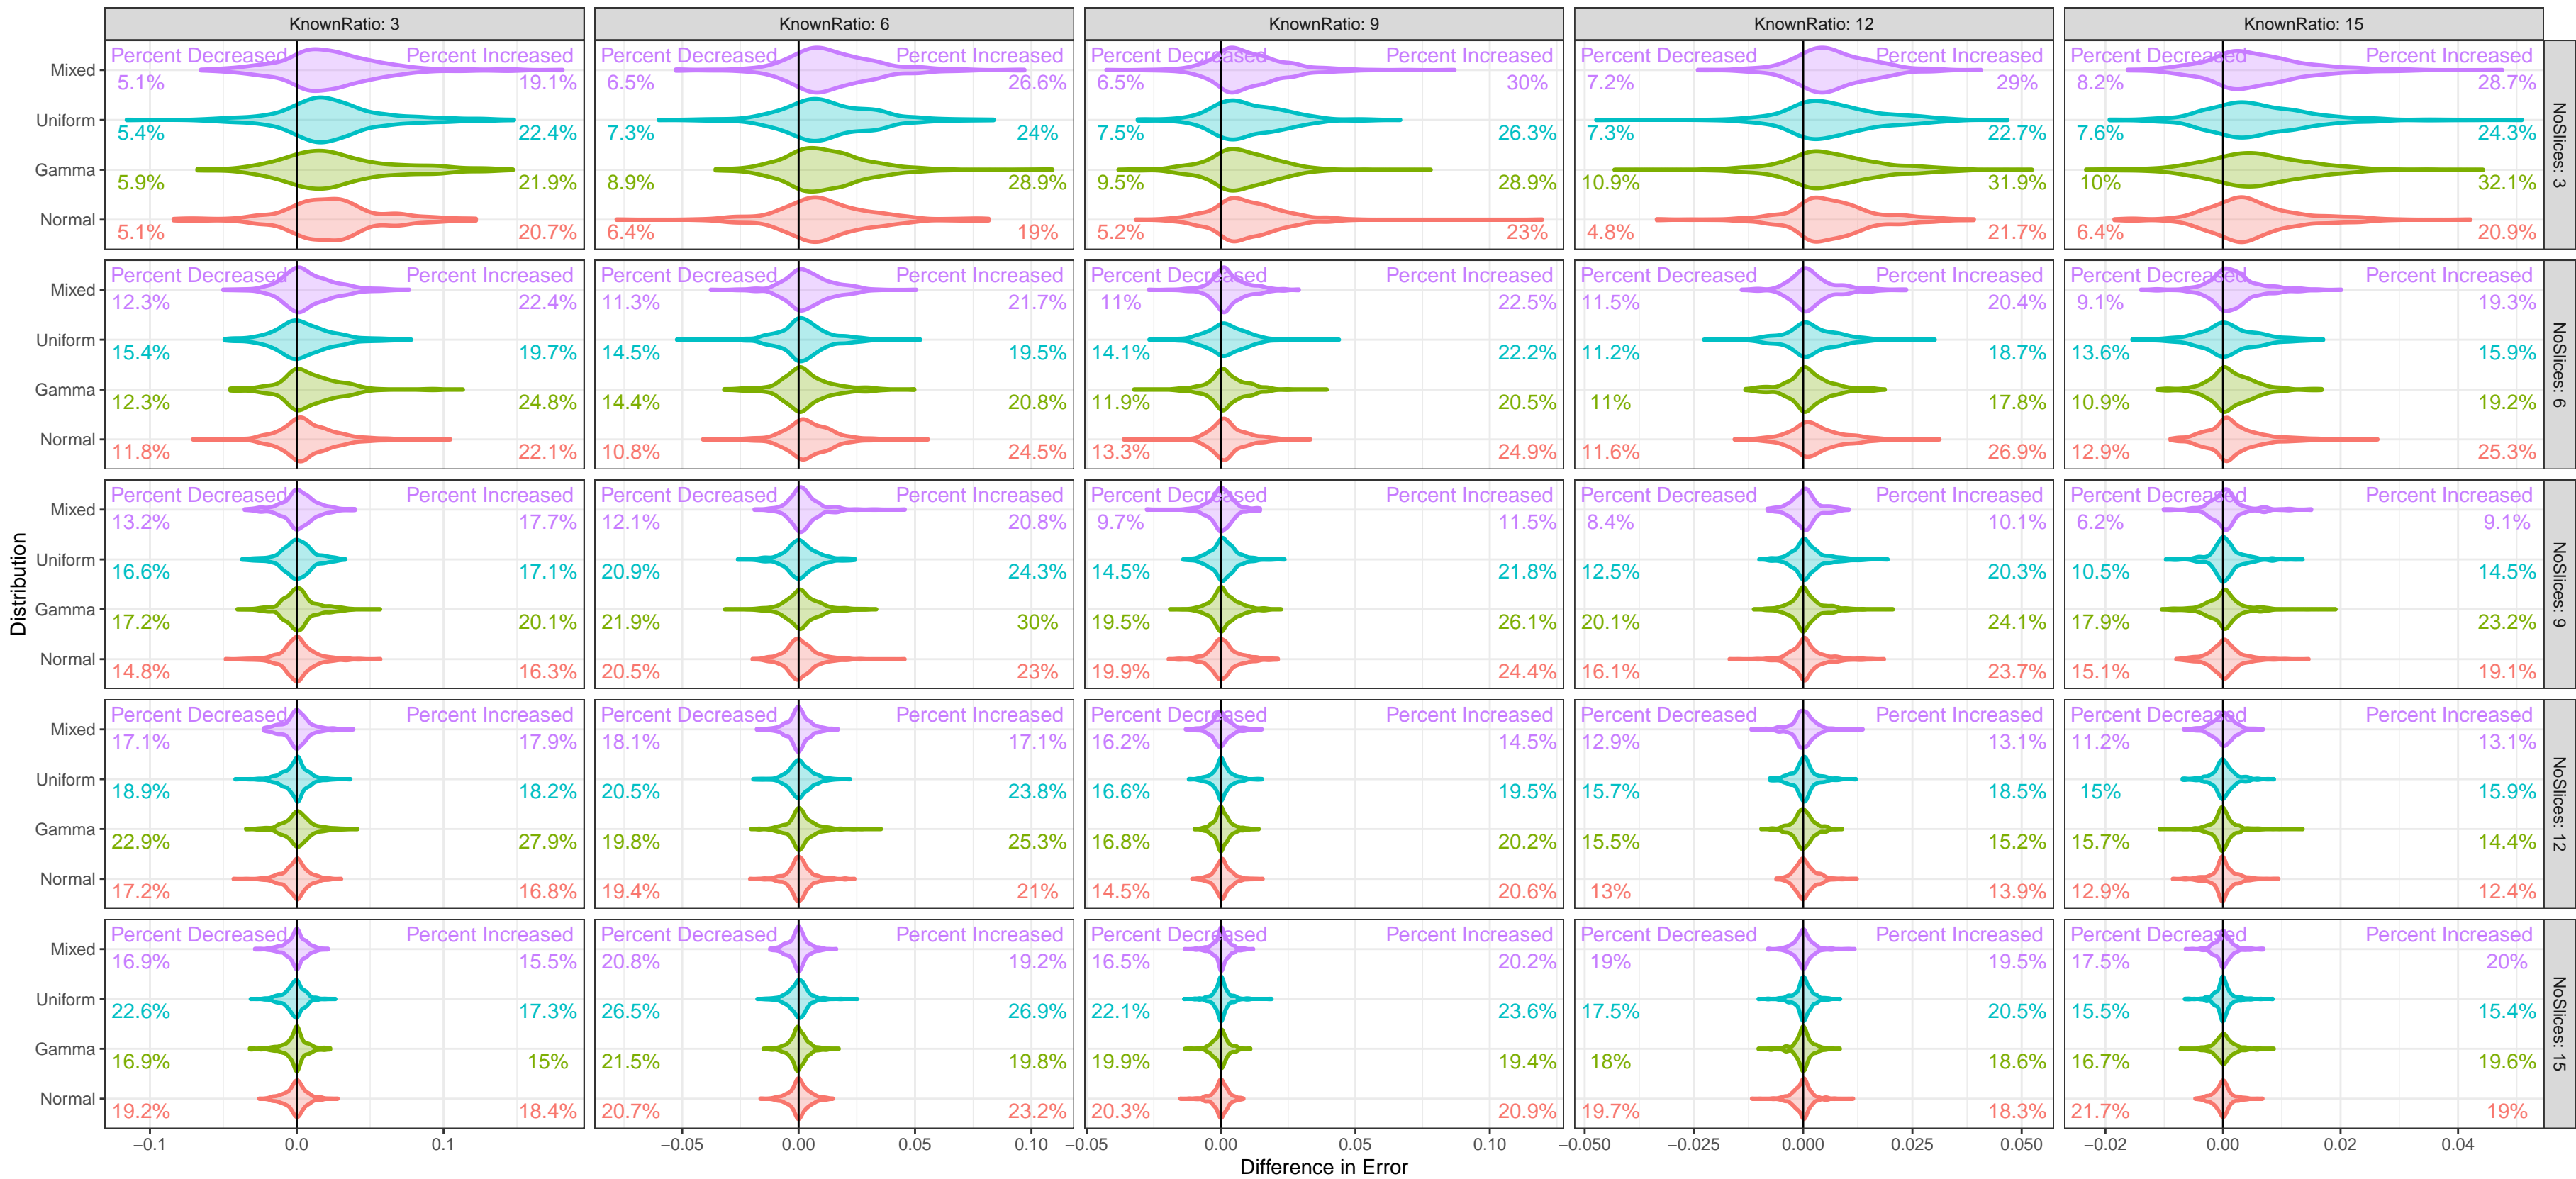

4 Response Levels, 500 Total Samples

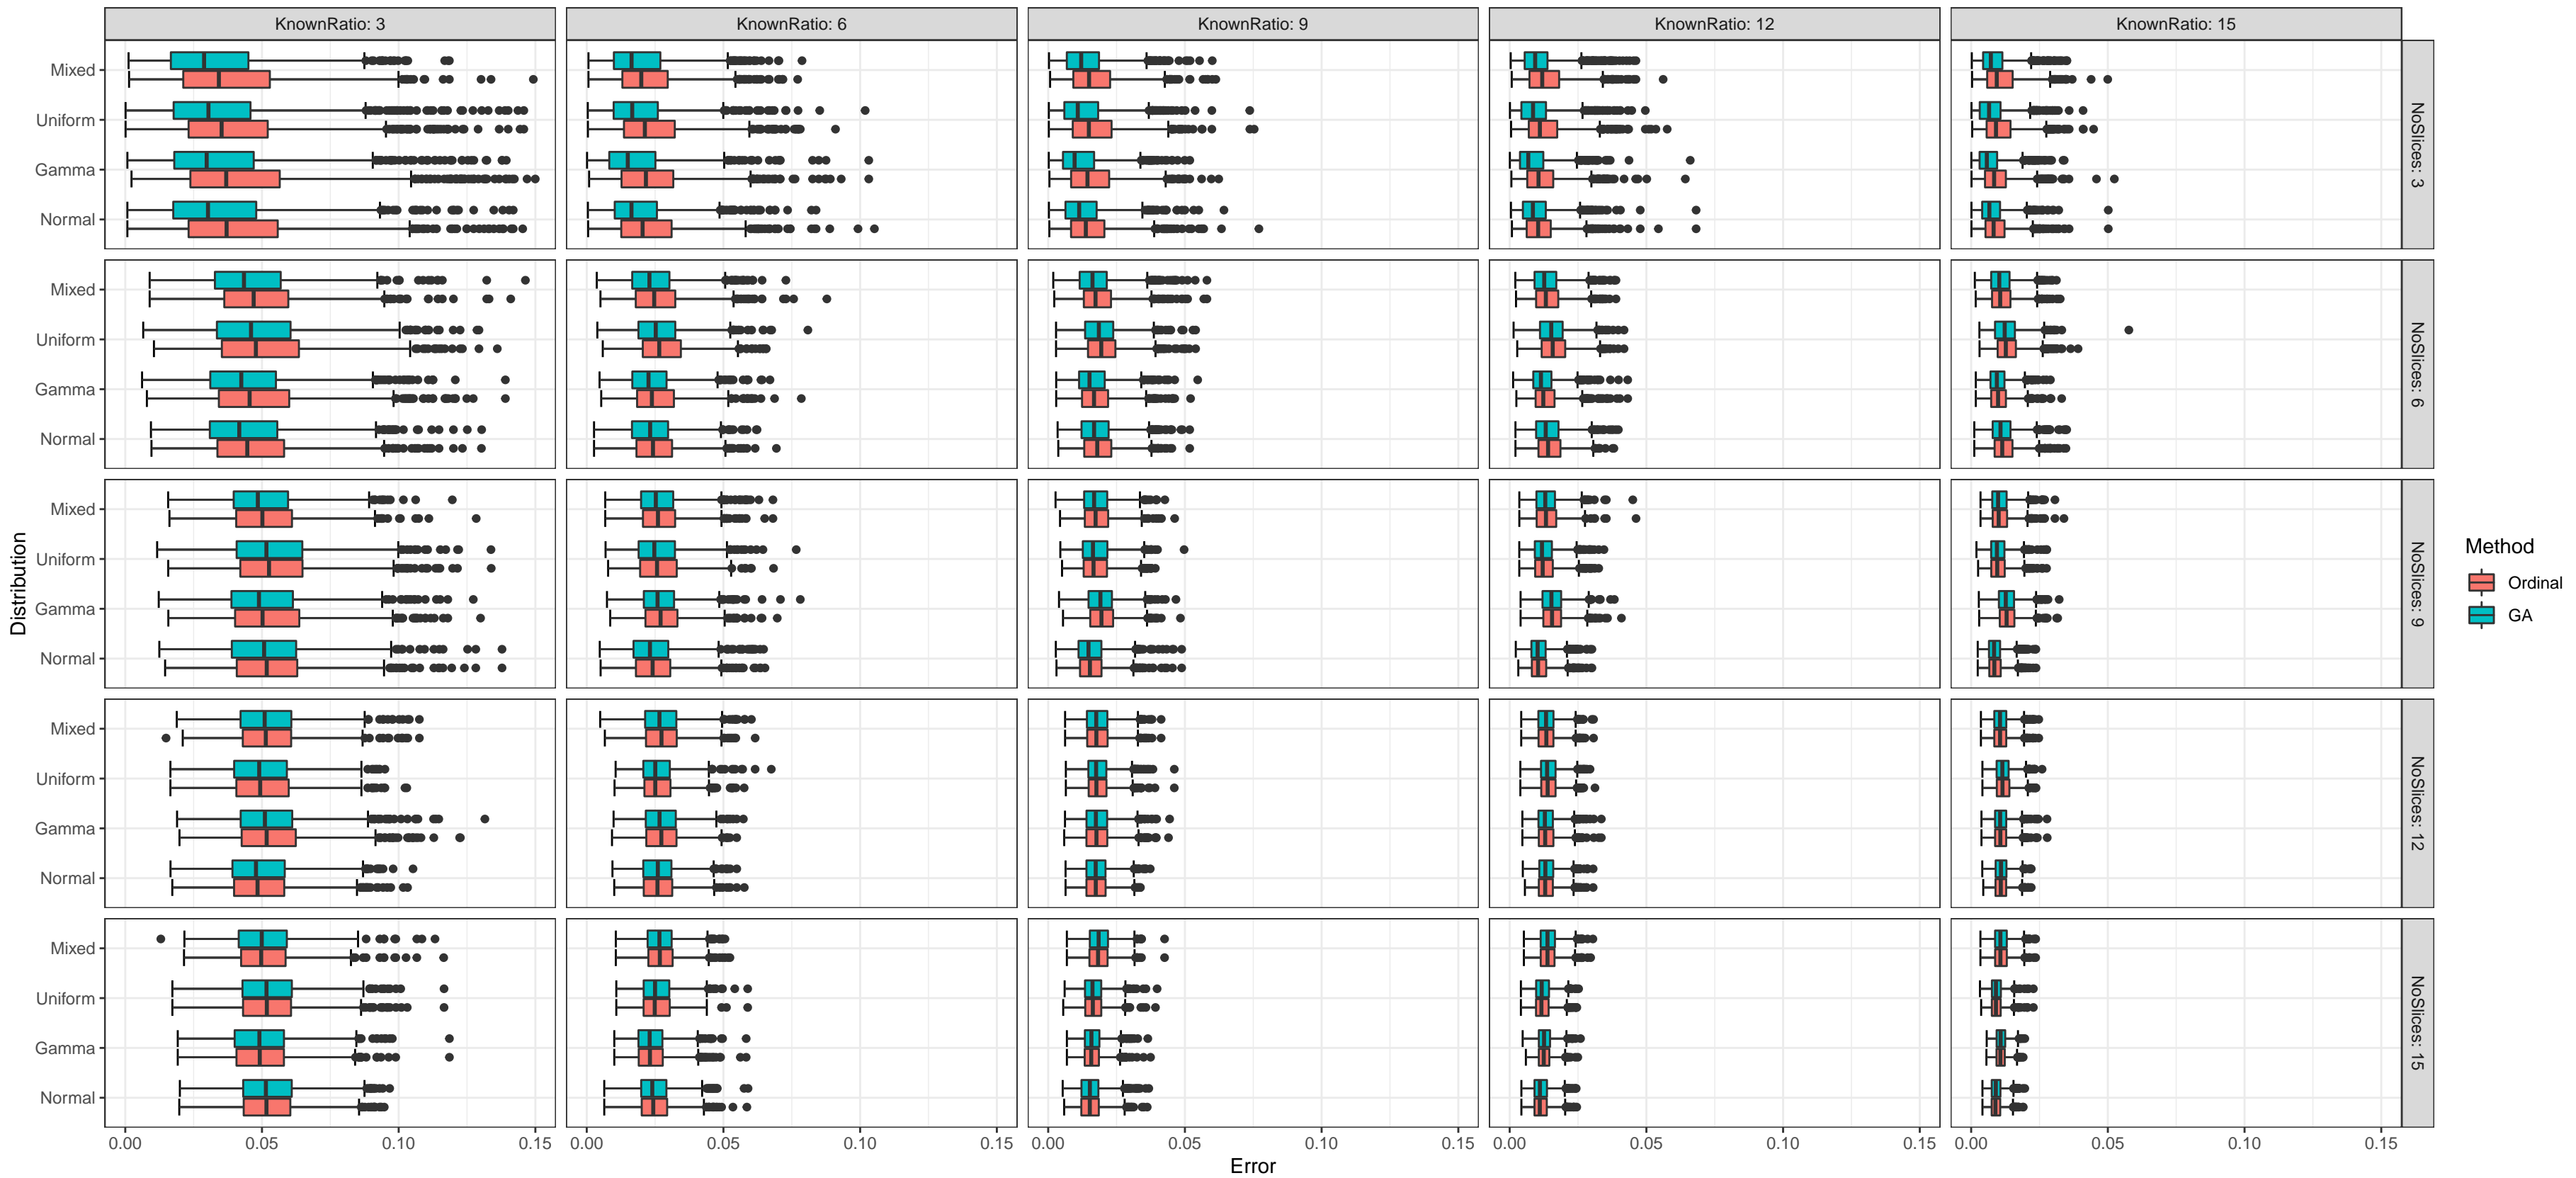

### 4 Response Levels, 500 Total Samples

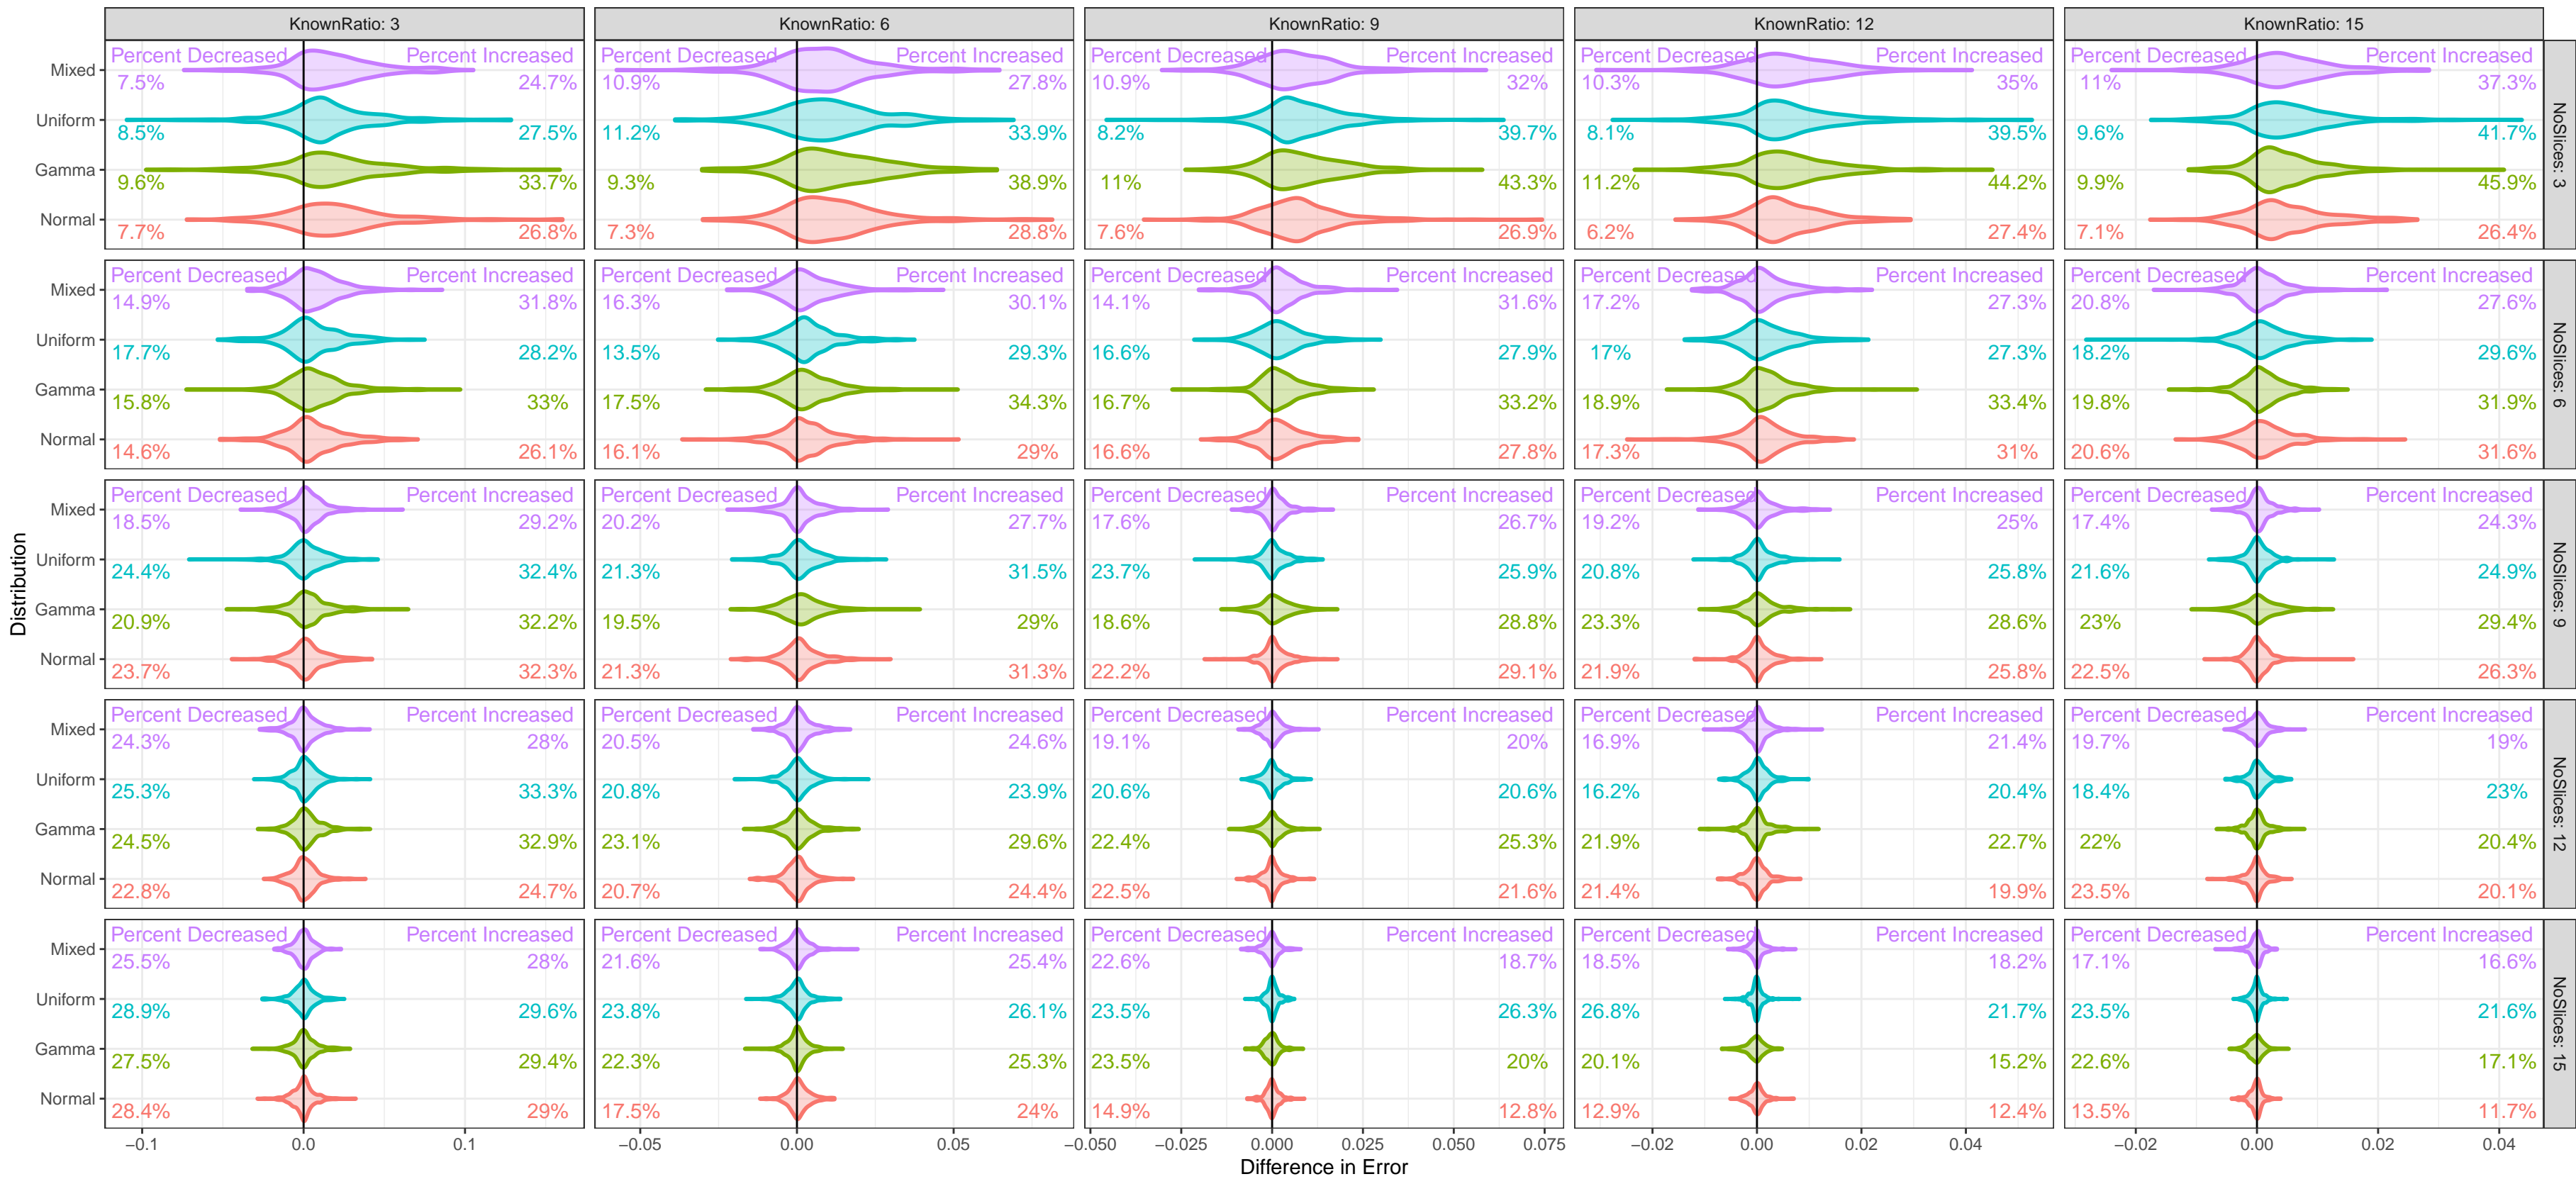

2 Response Levels, 1000 Total Samples

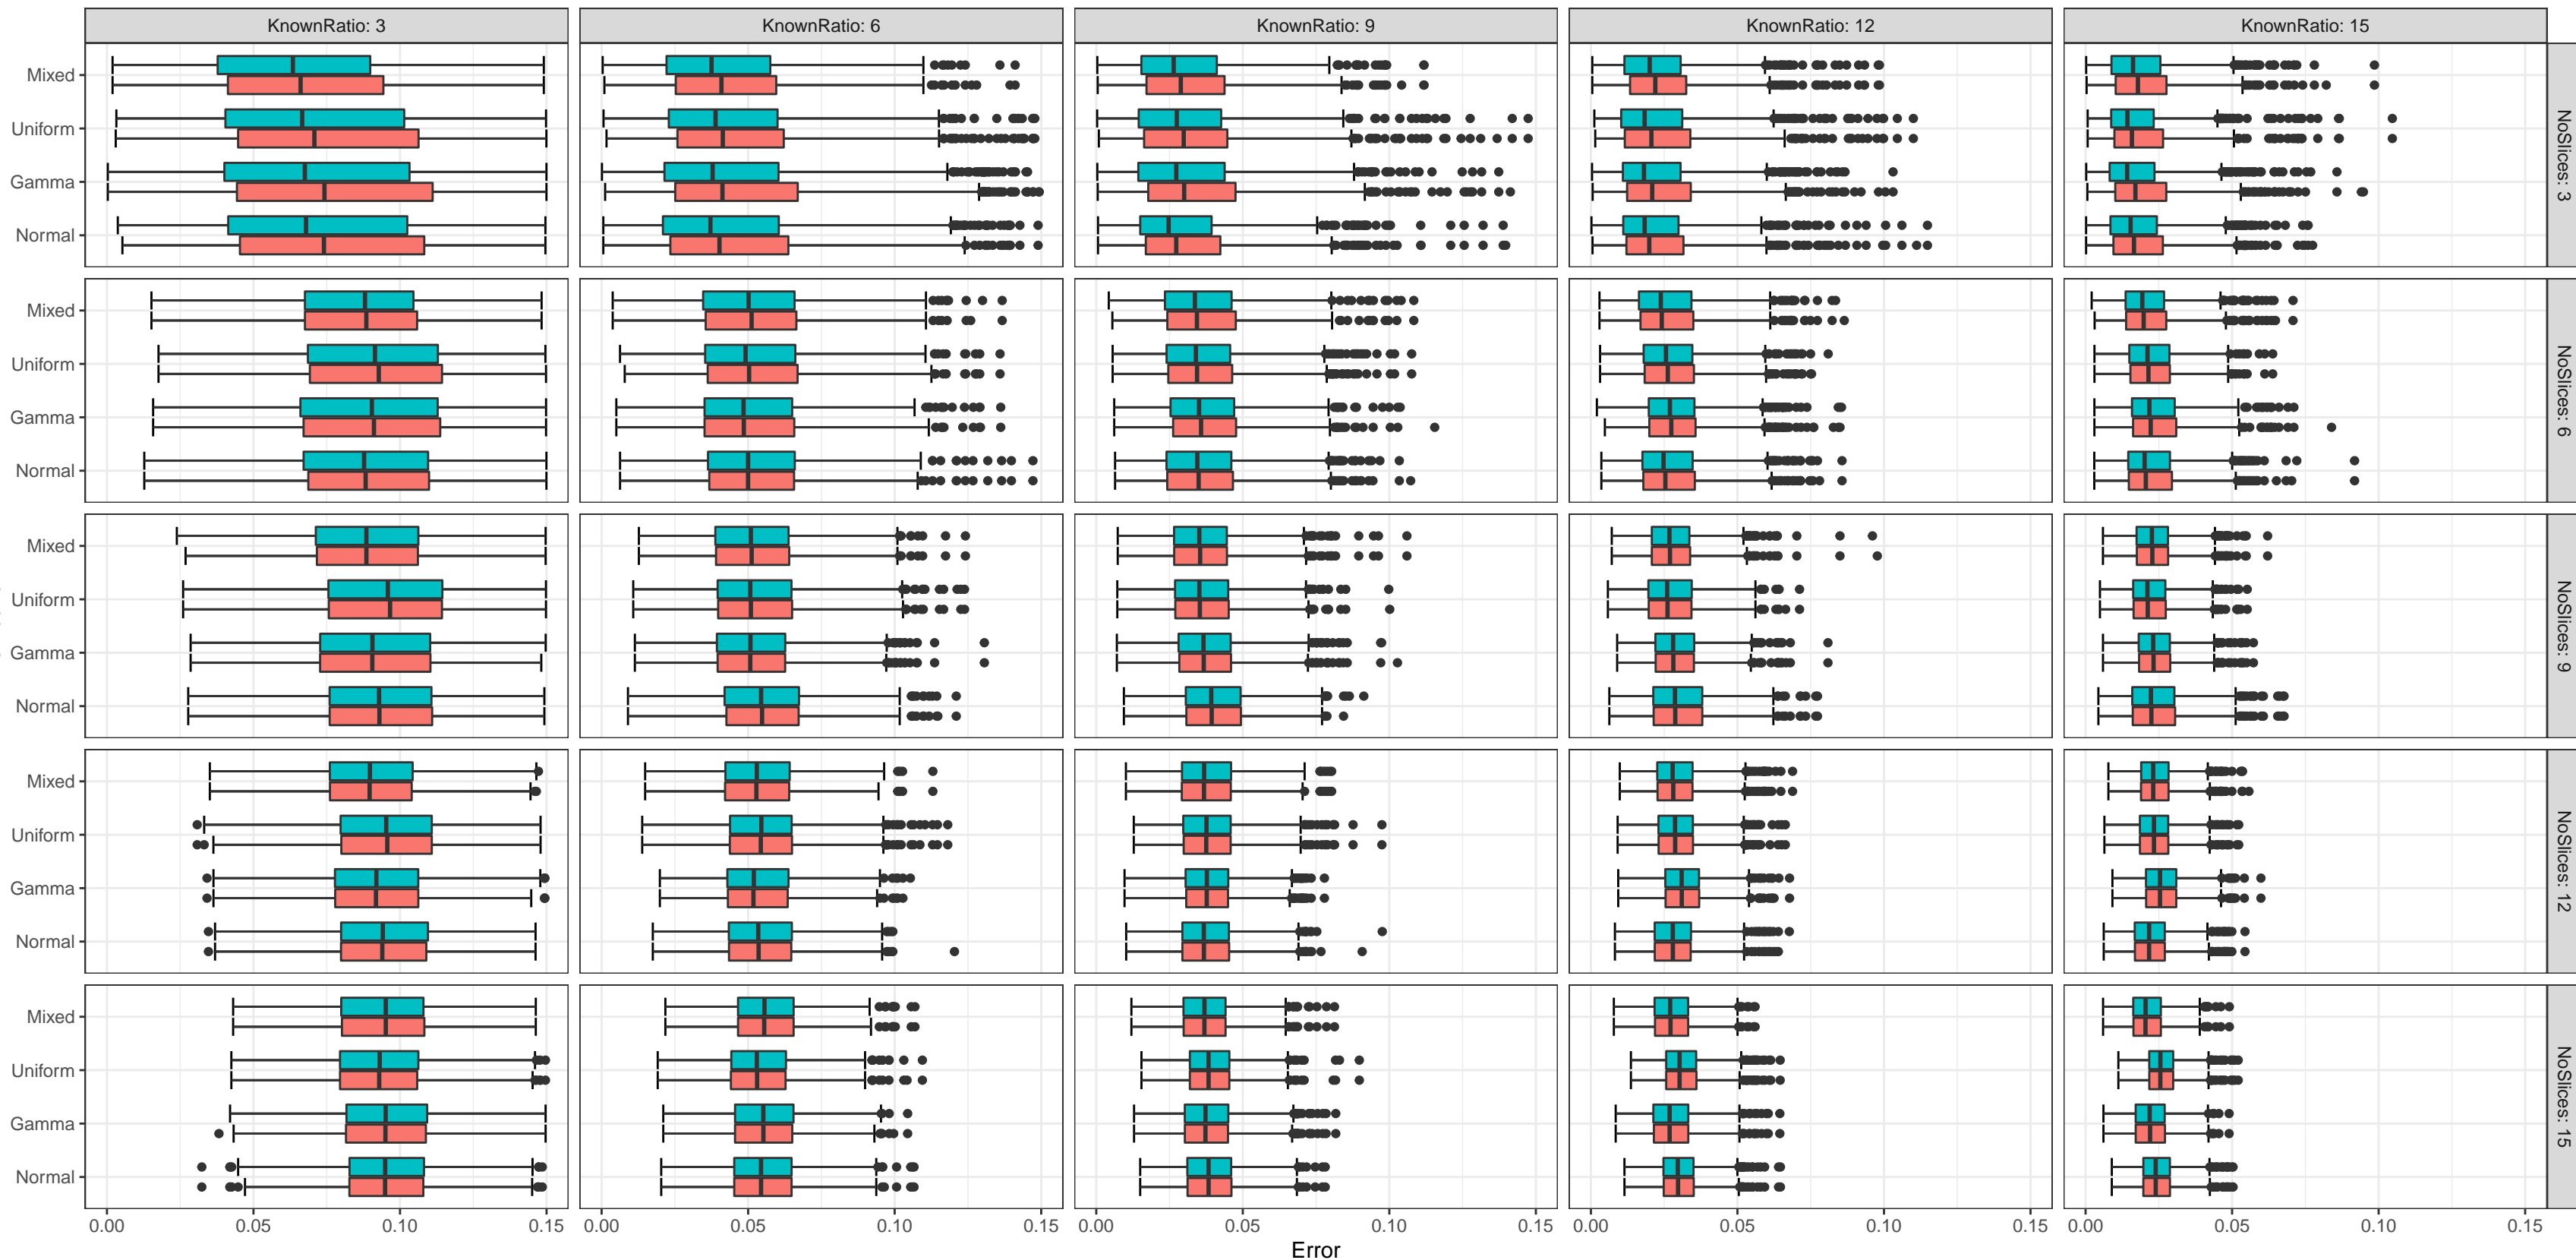

Method  
█ Ordinal  
█ GA

## 2 Response Levels, 1000 Total Samples

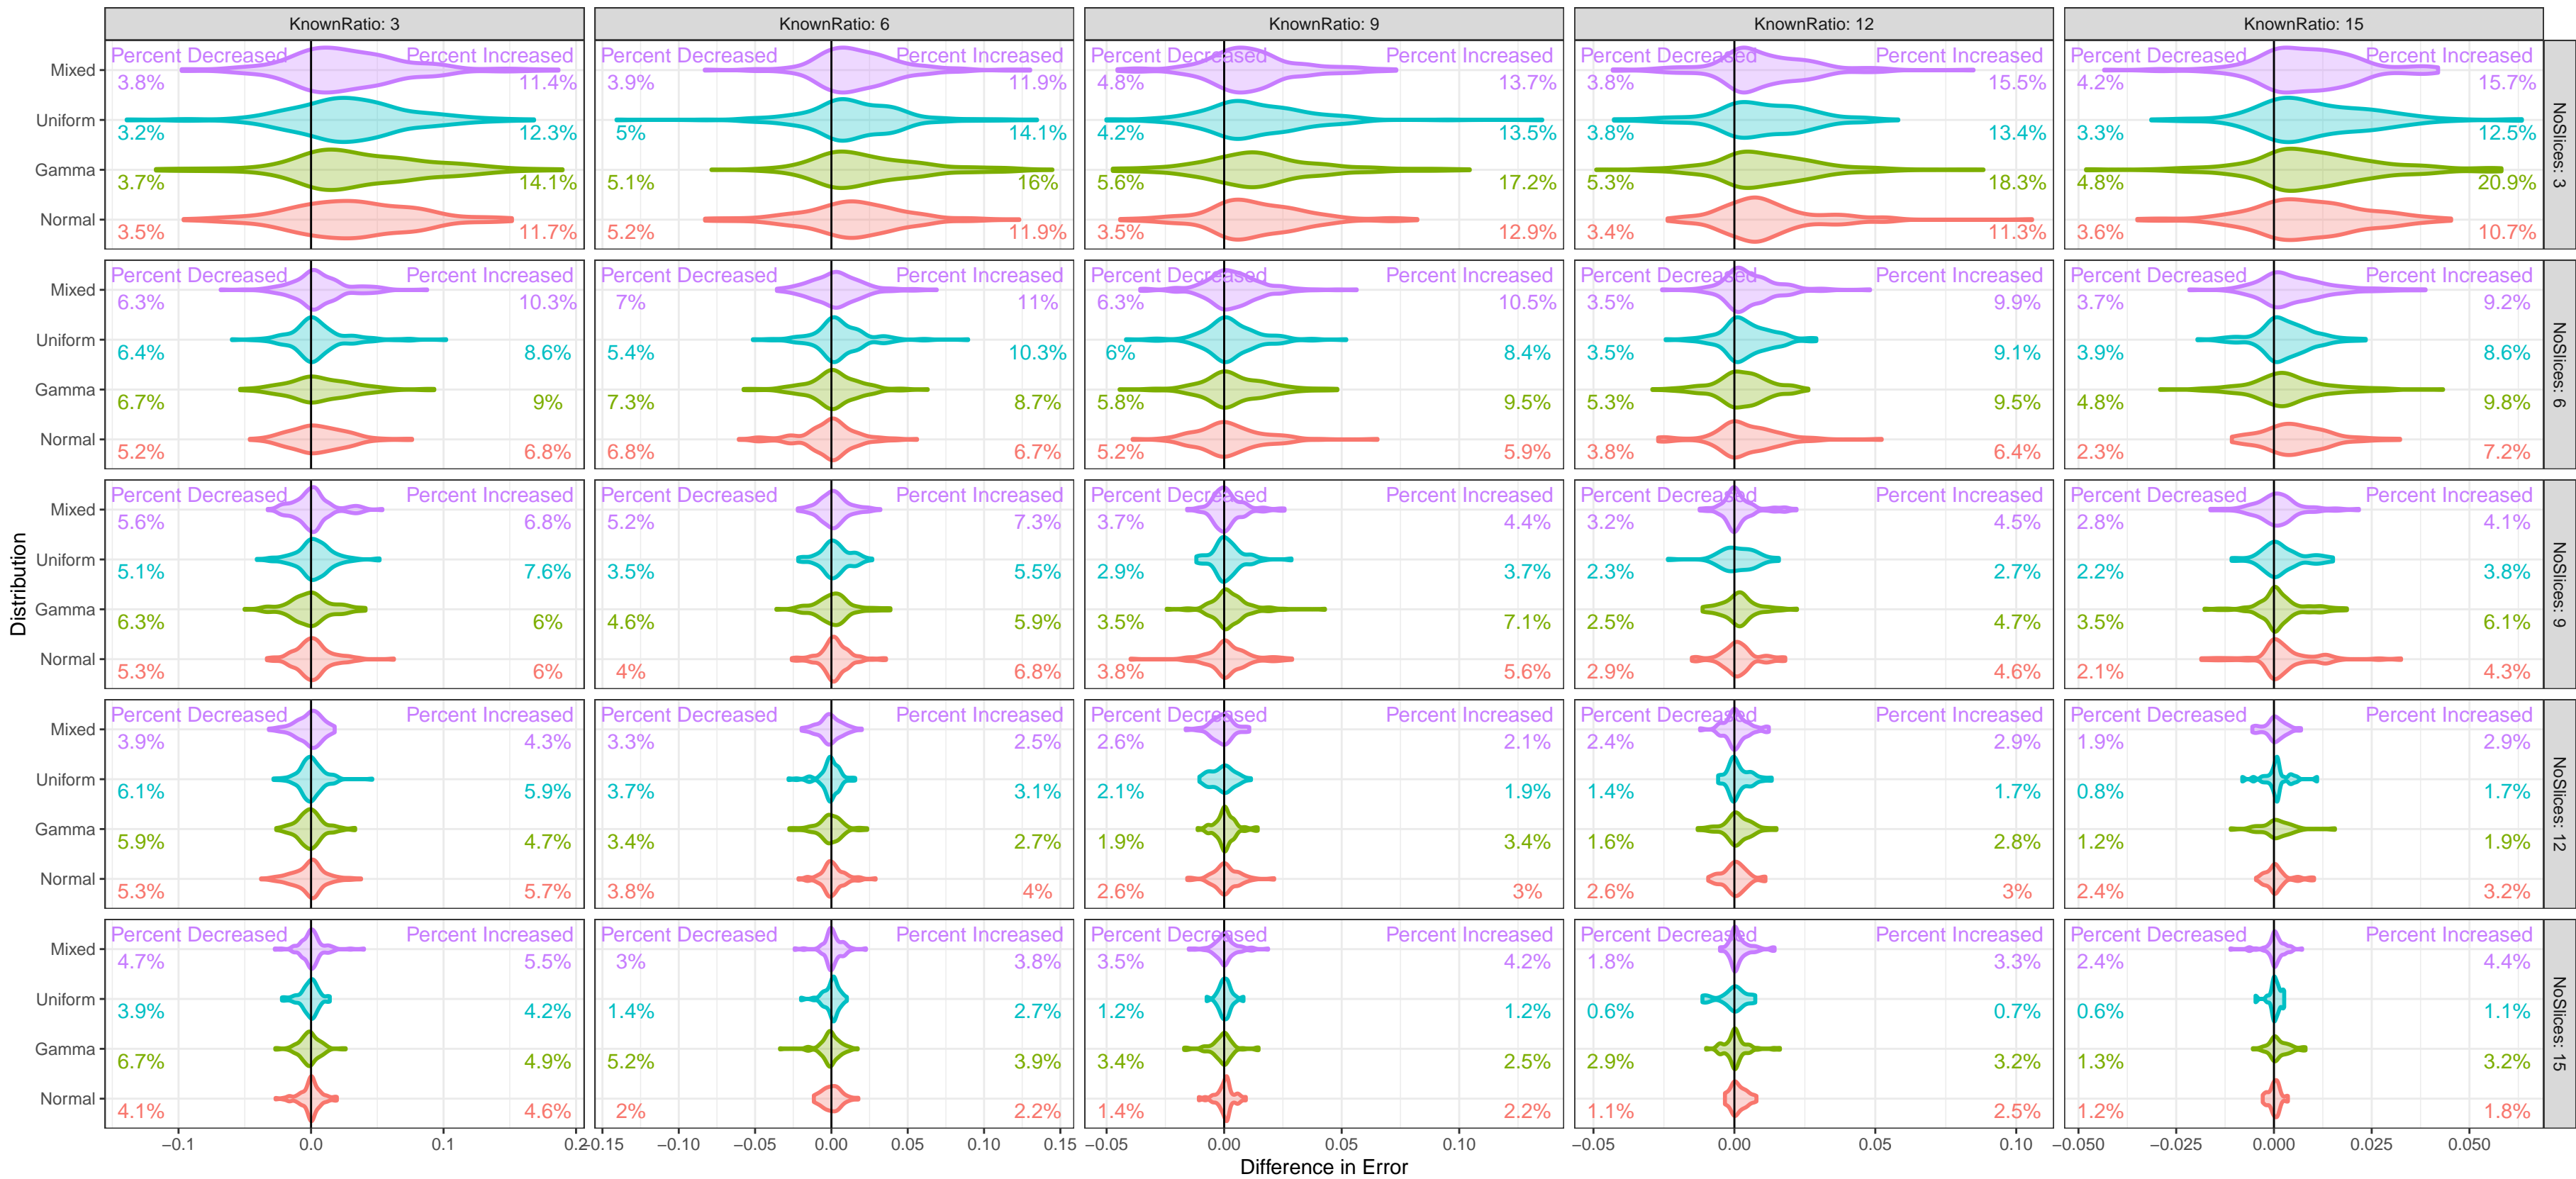



3 Response Levels, 1000 Total Samples

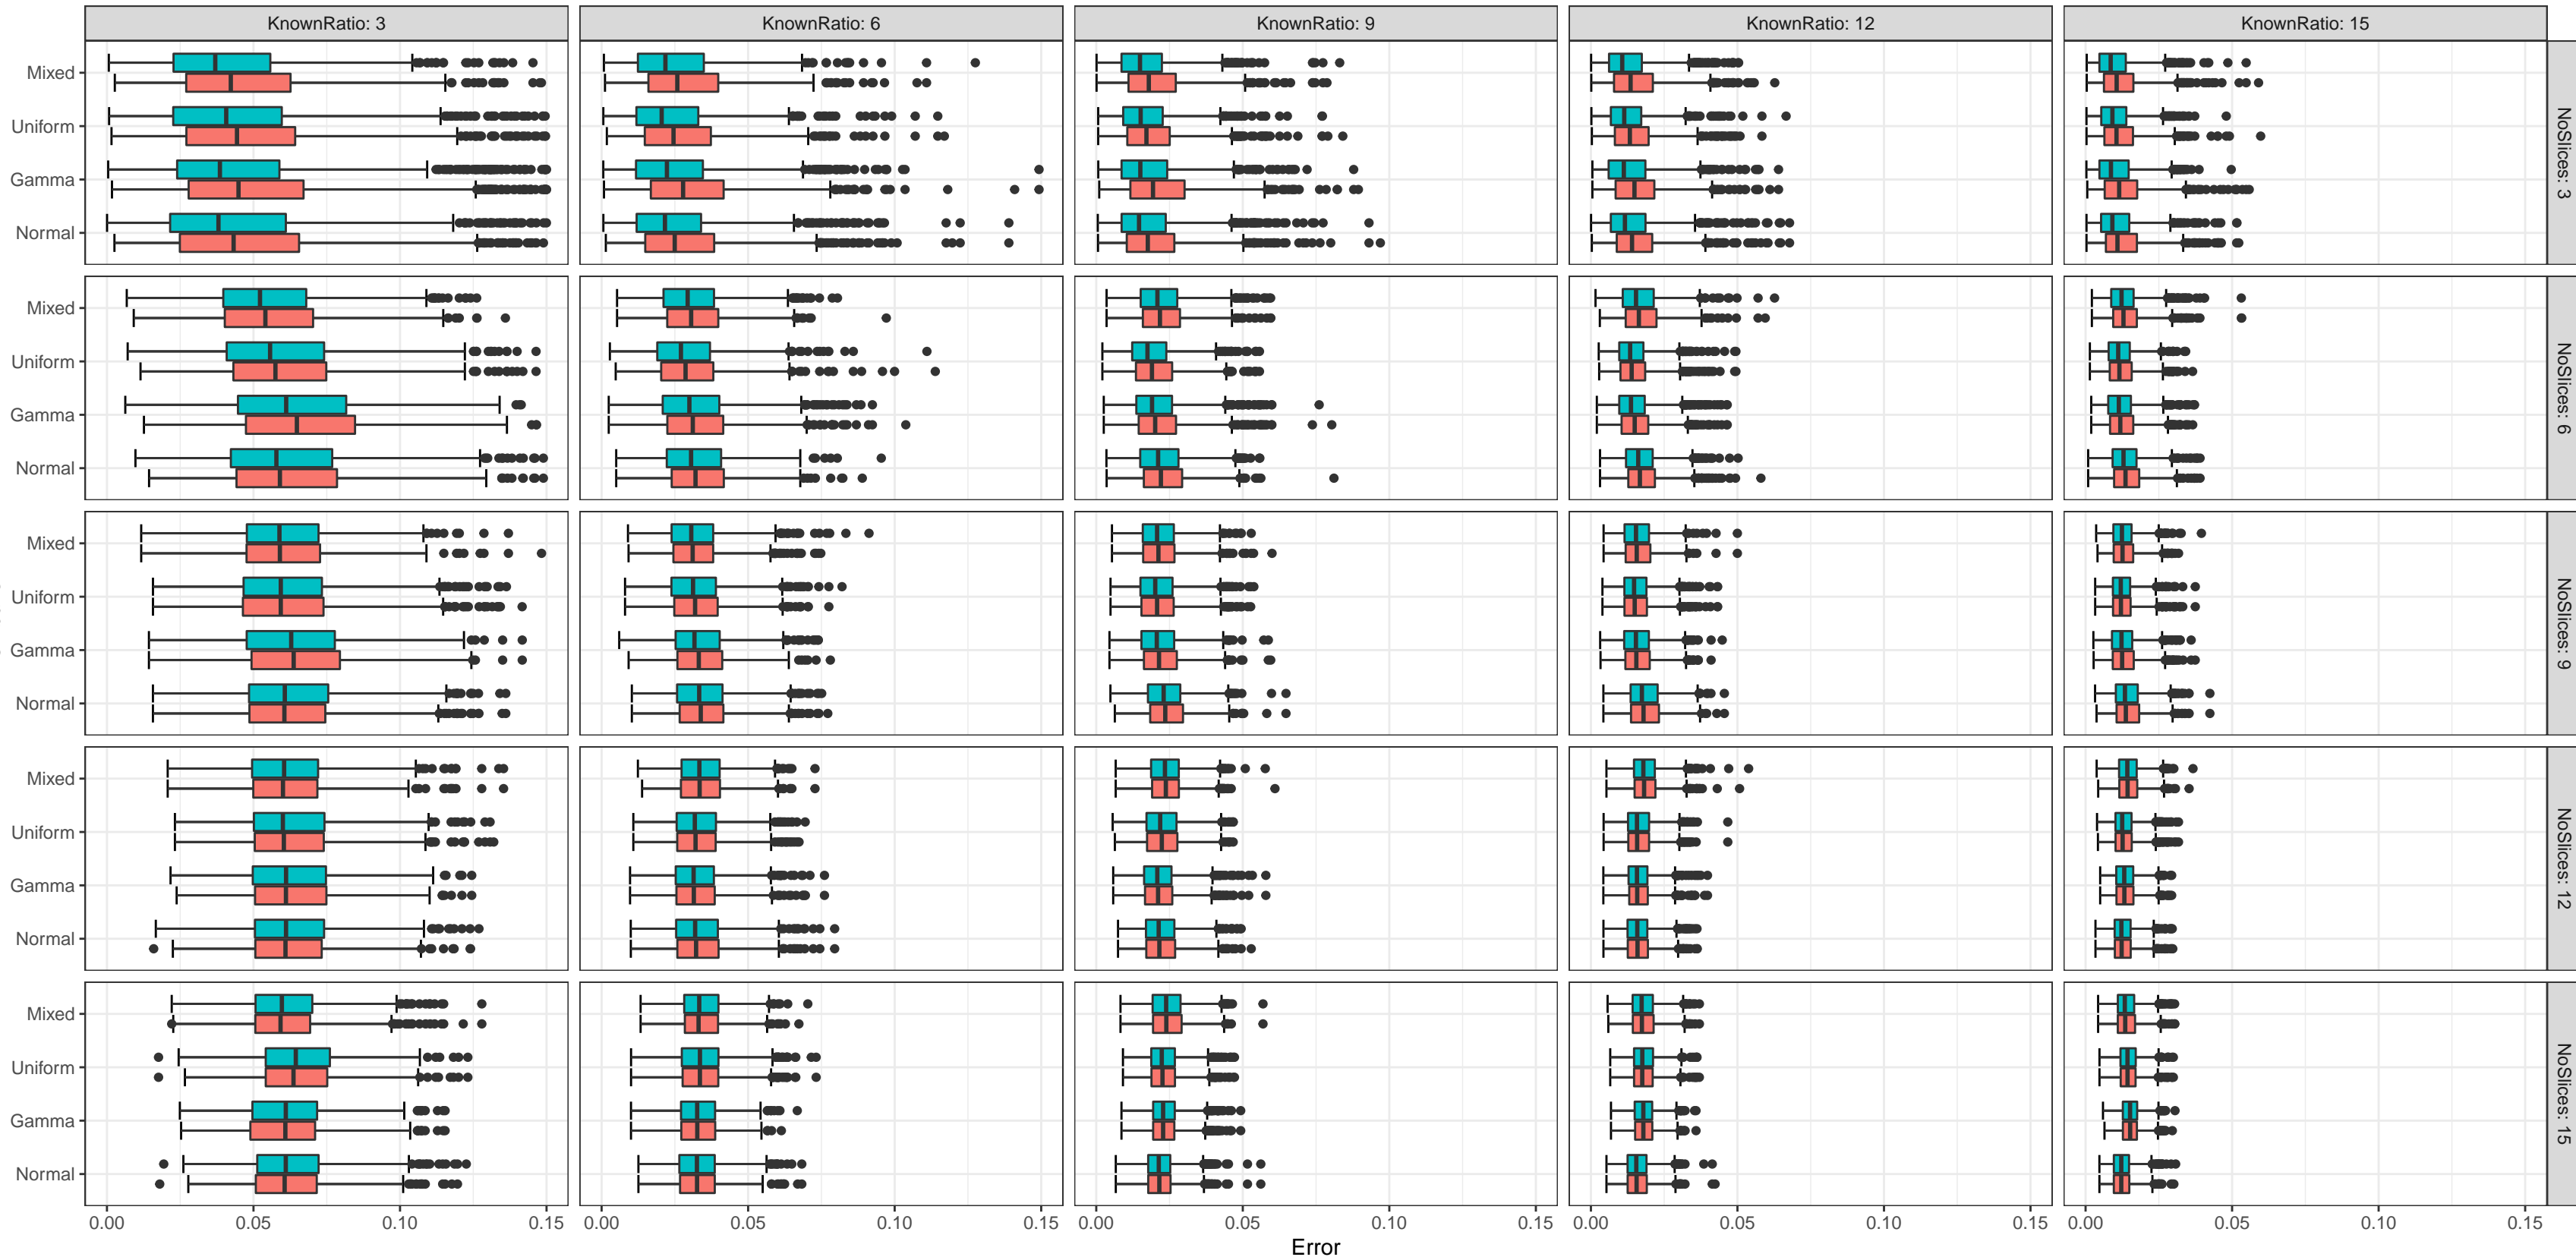

Method  
█ Ordinal  
█ GA

### 3 Response Levels, 1000 Total Samples

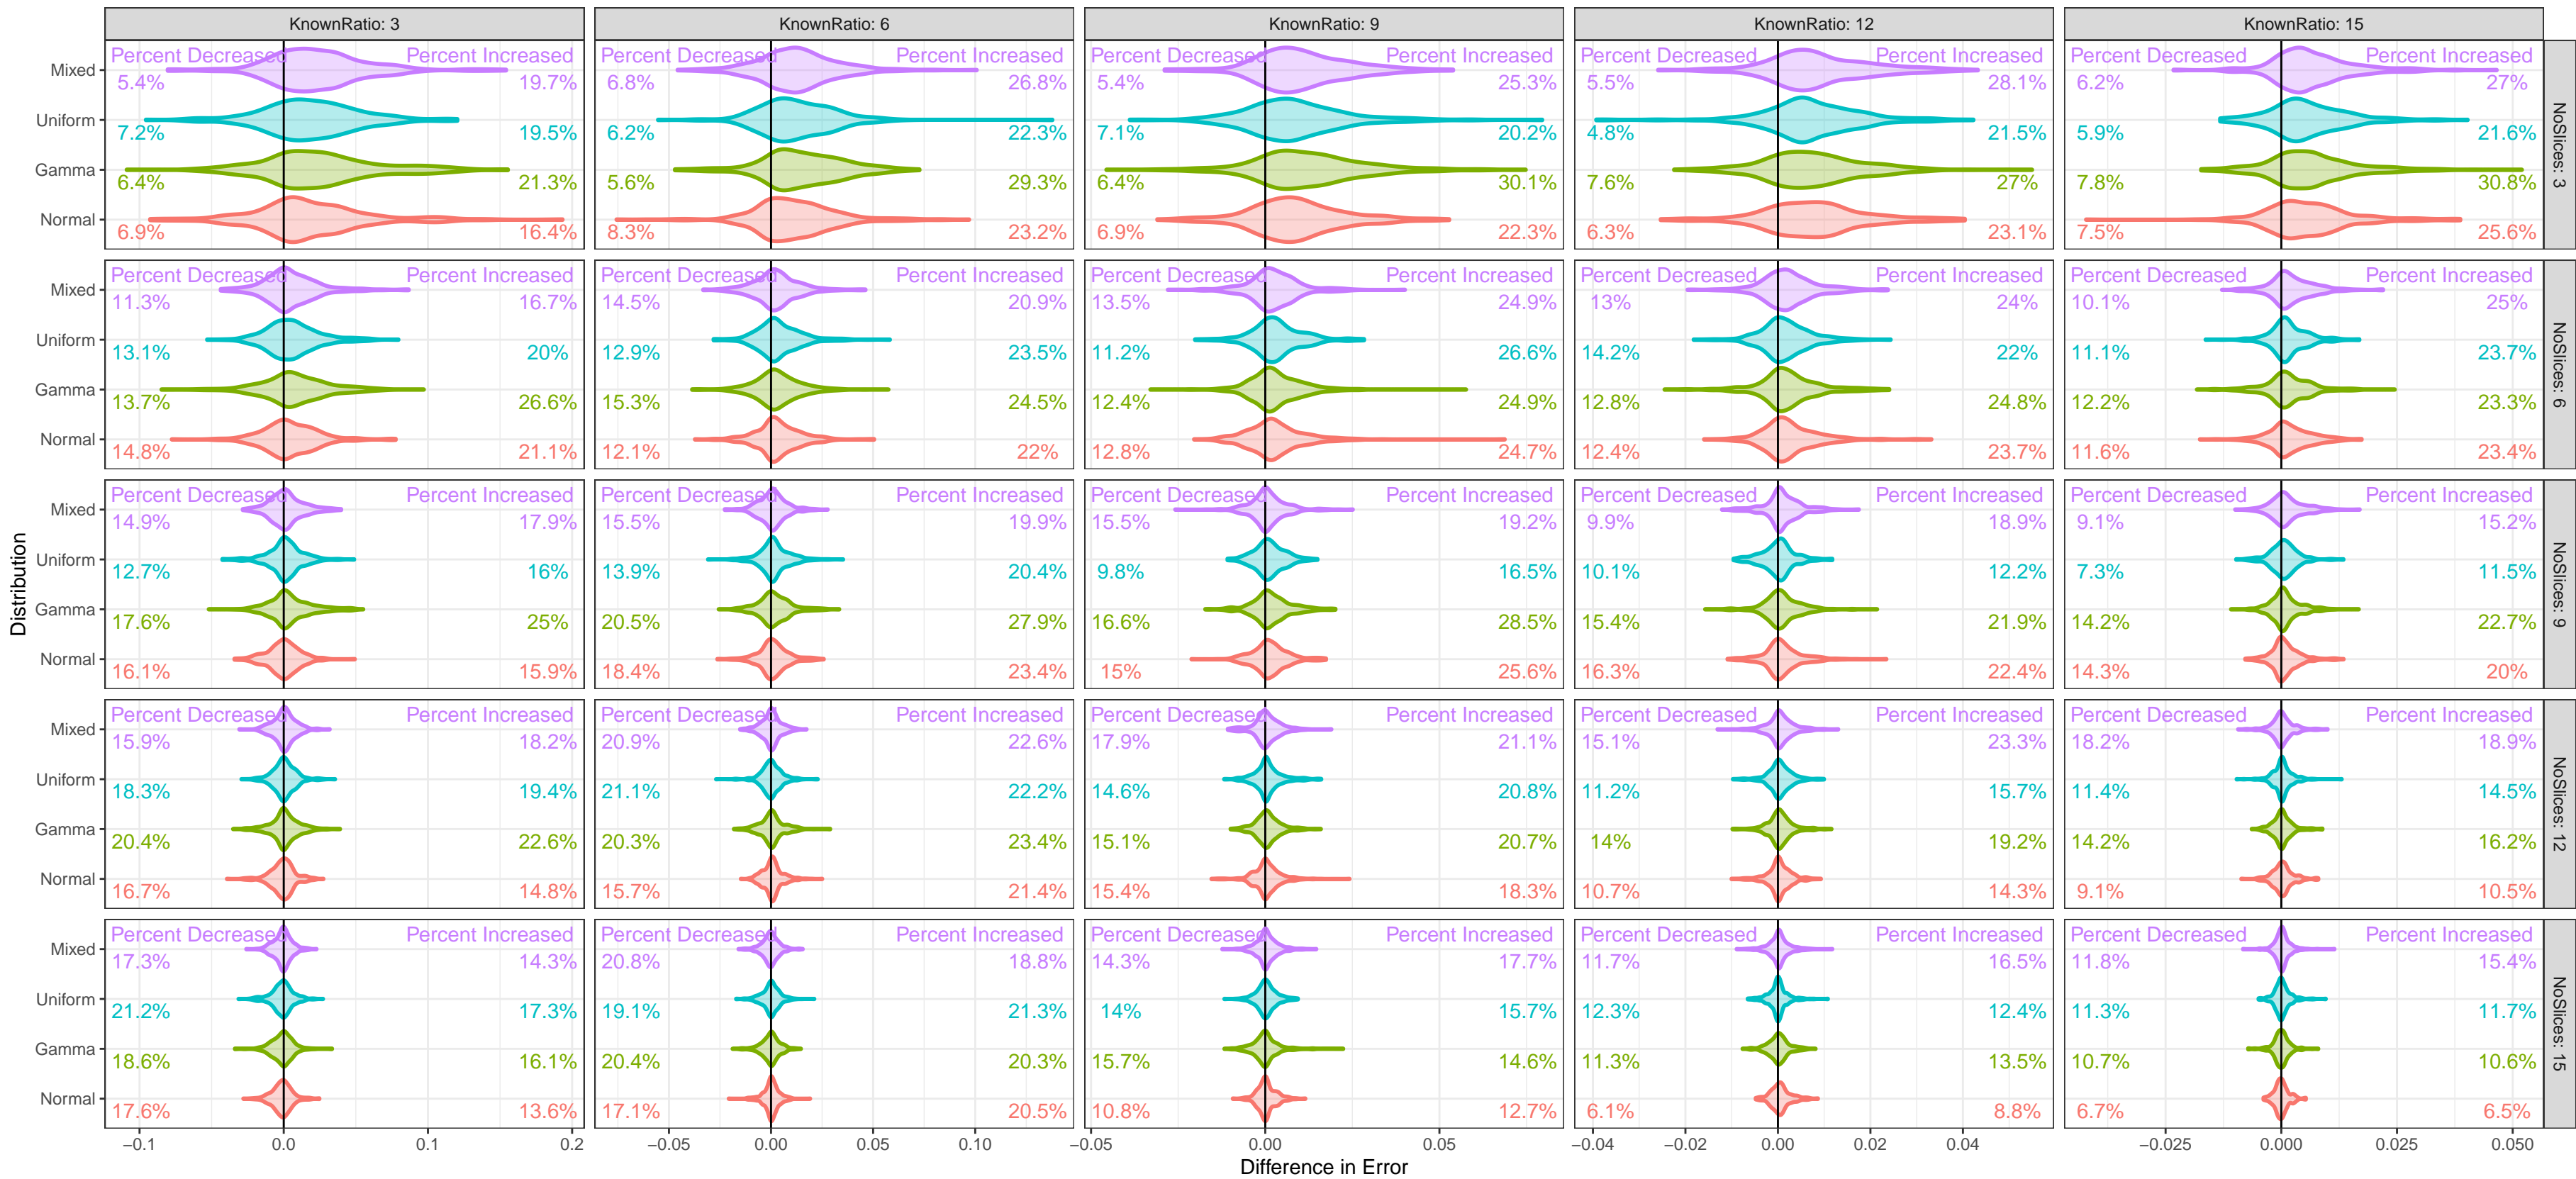

4 Response Levels, 1000 Total Samples

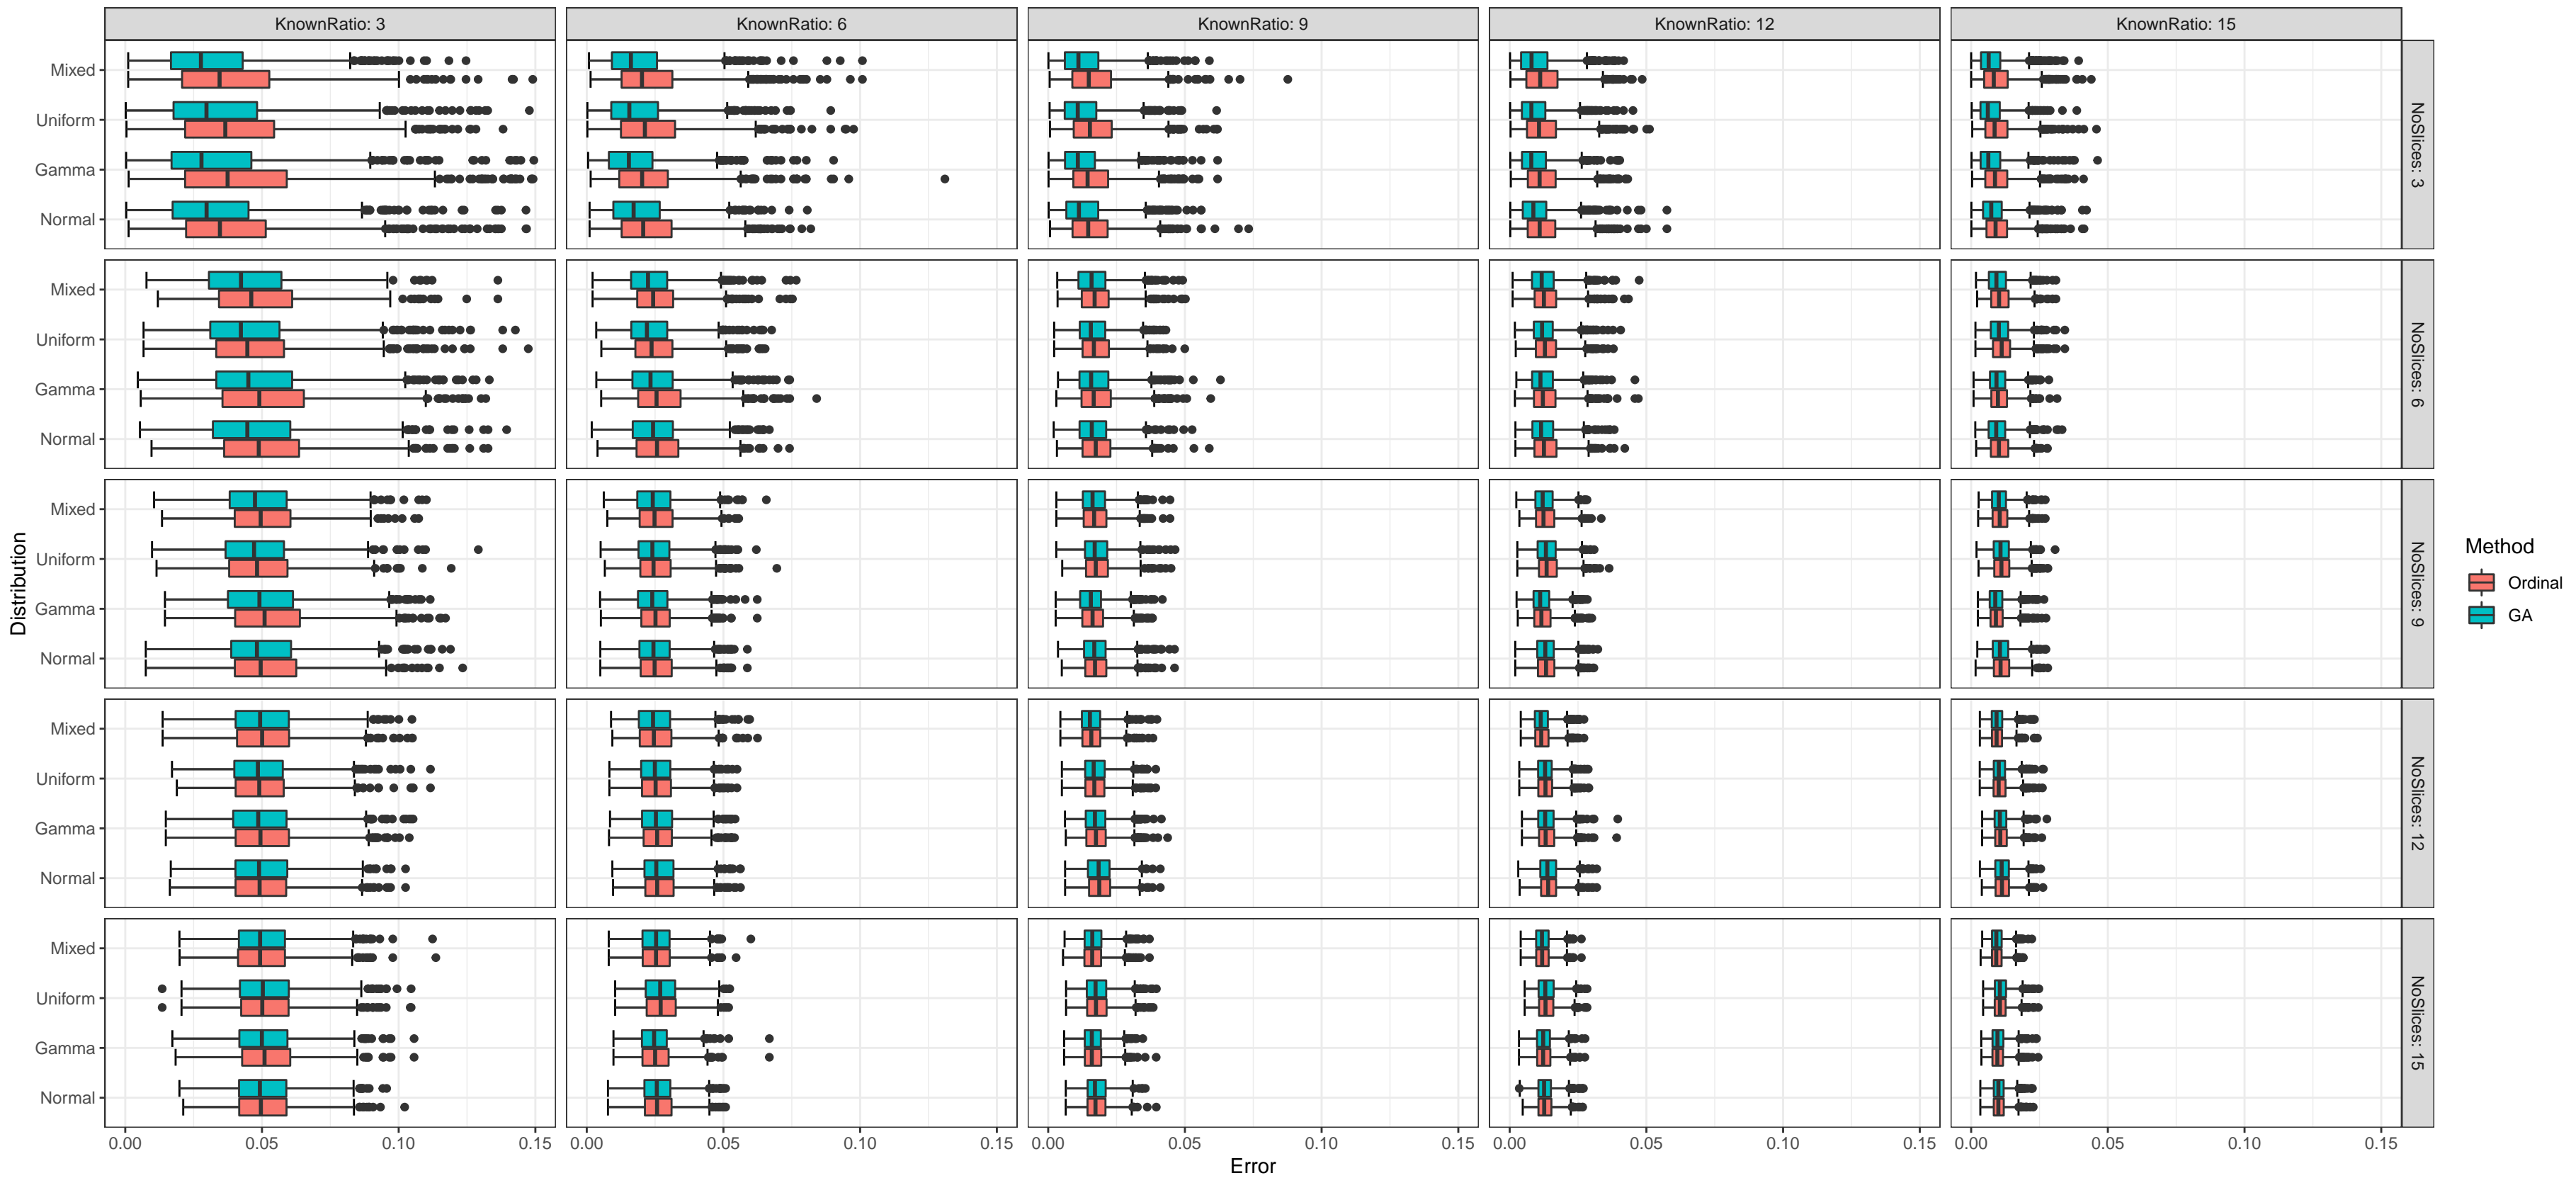

### 4 Response Levels, 1000 Total Samples

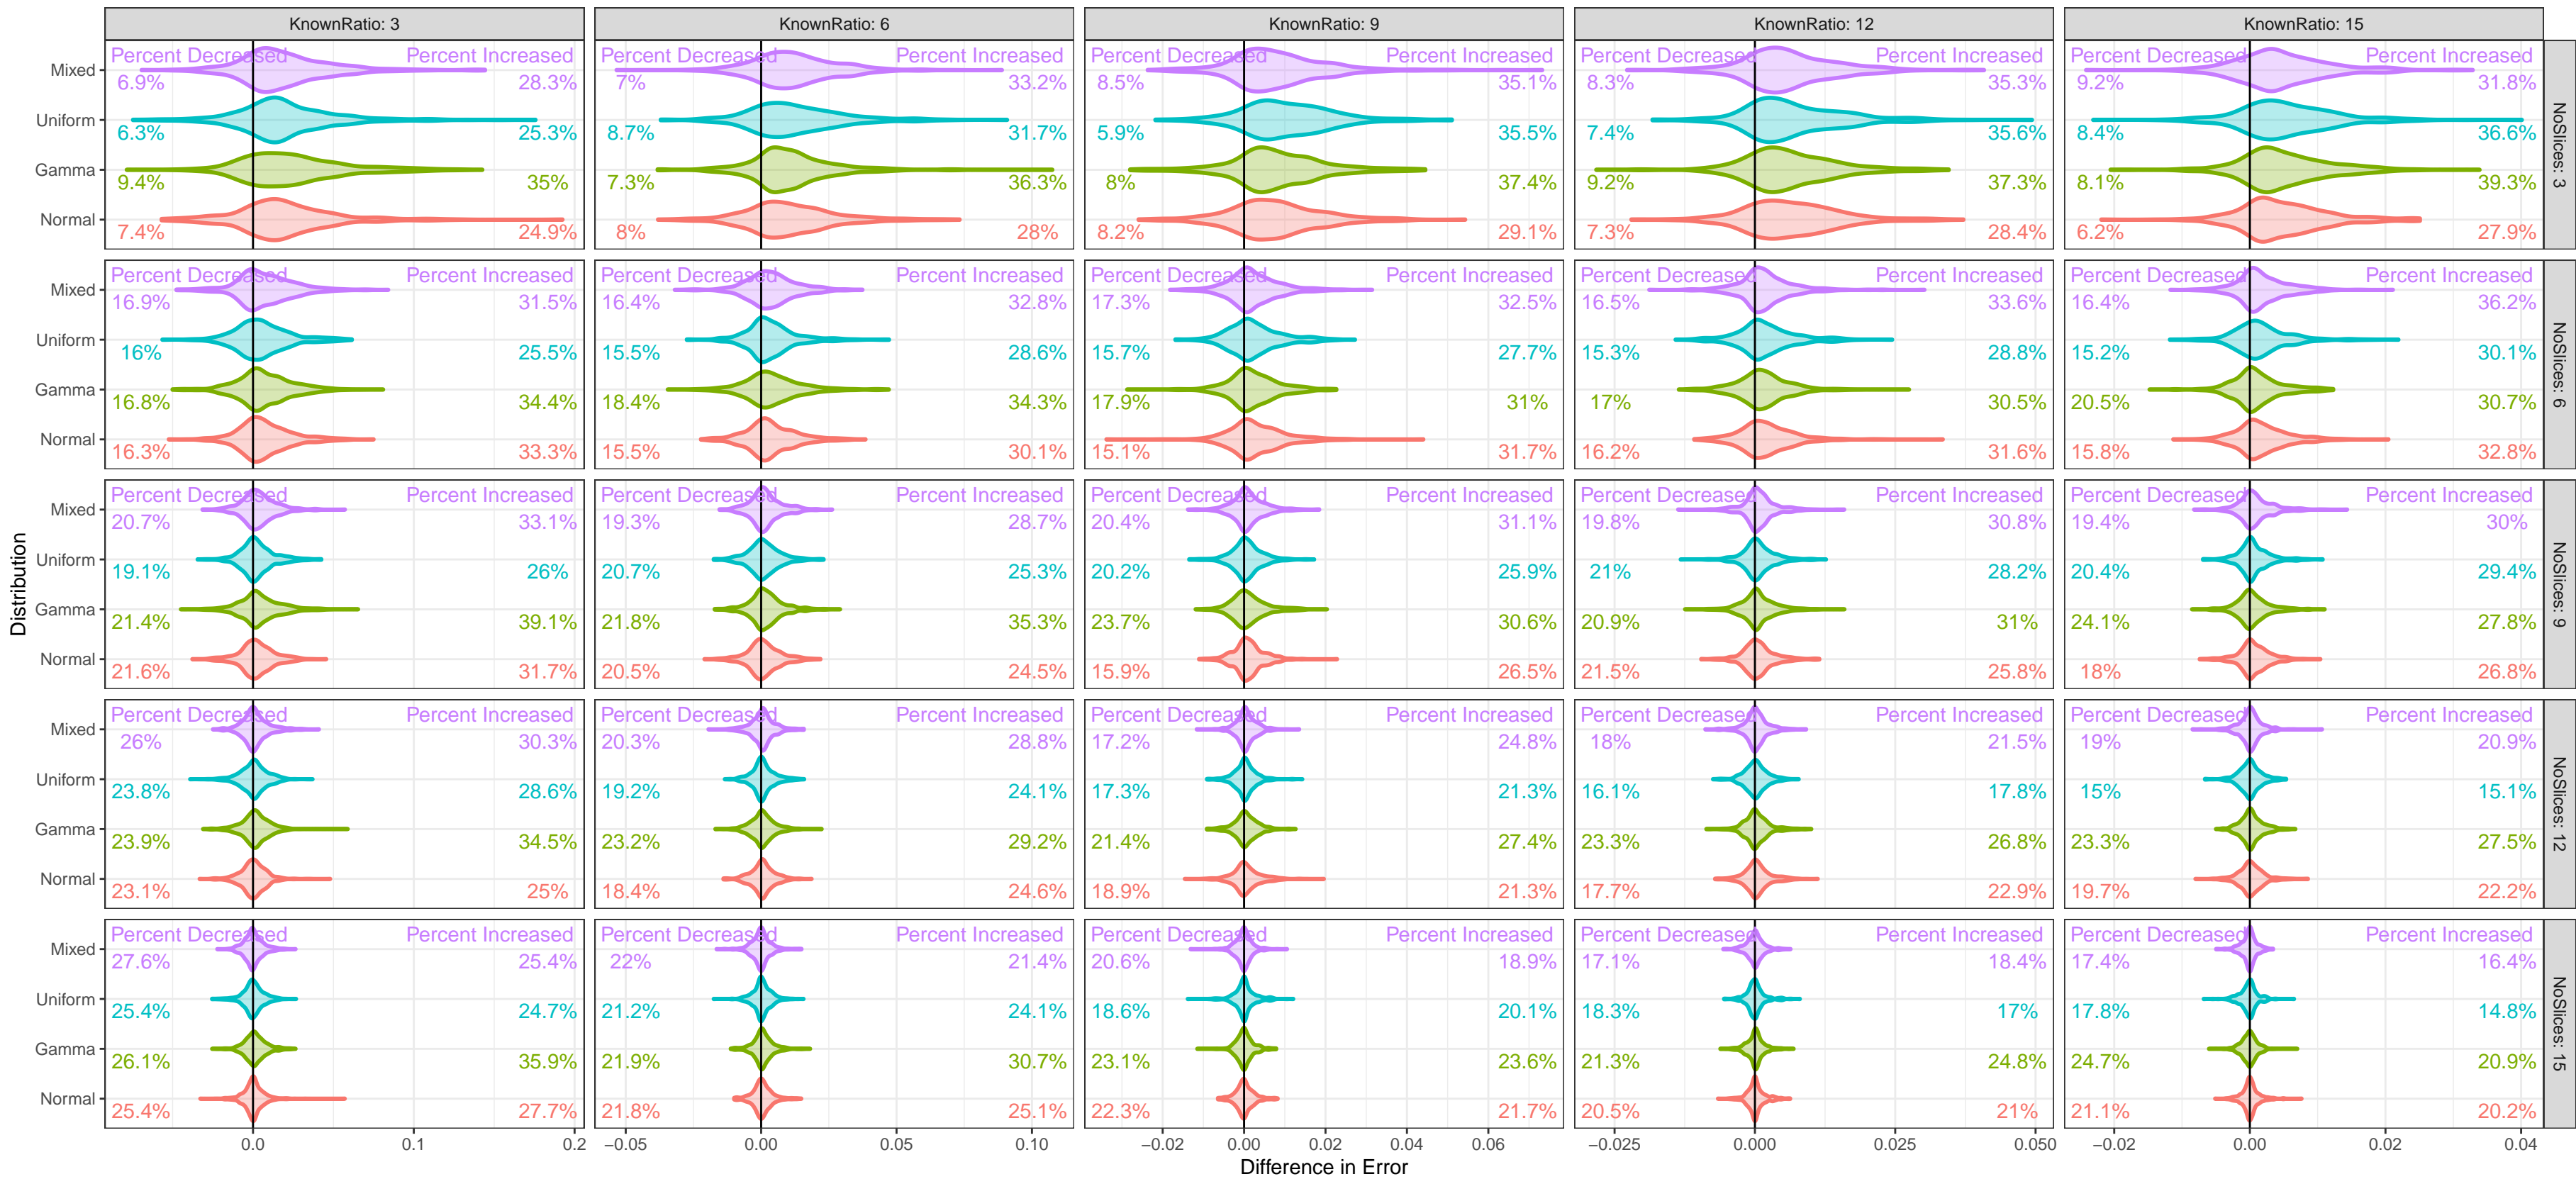

2 Response Levels, 5000 Total Samples

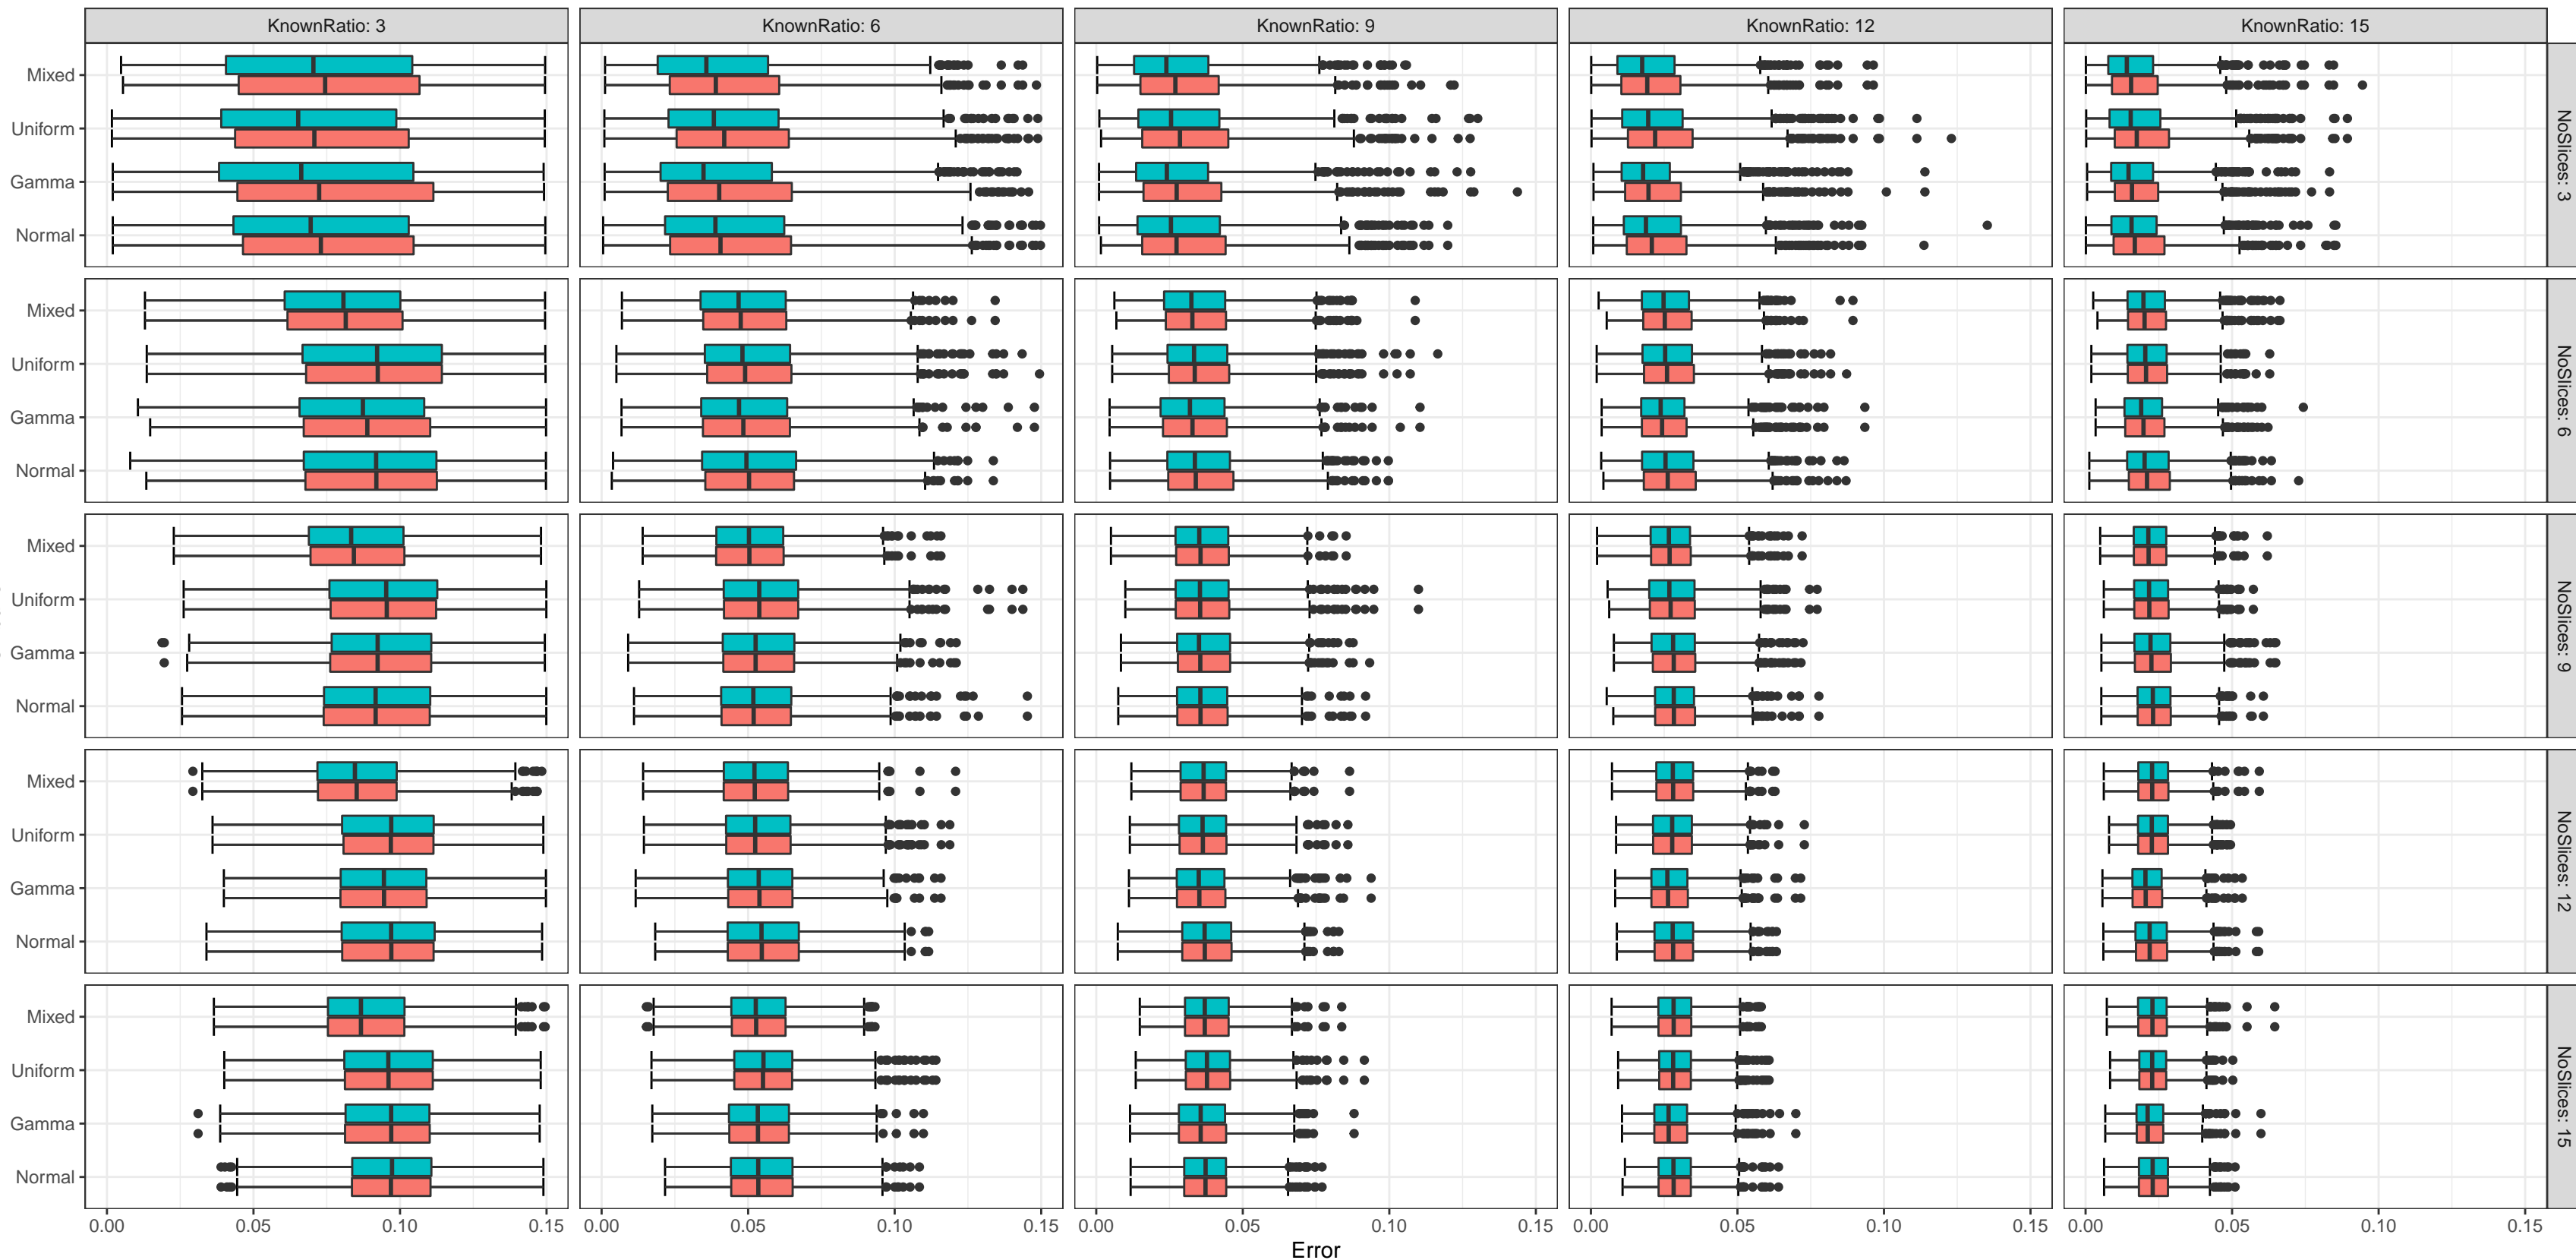

Method  
█ Ordinal  
█ GA

## 2 Response Levels, 5000 Total Samples

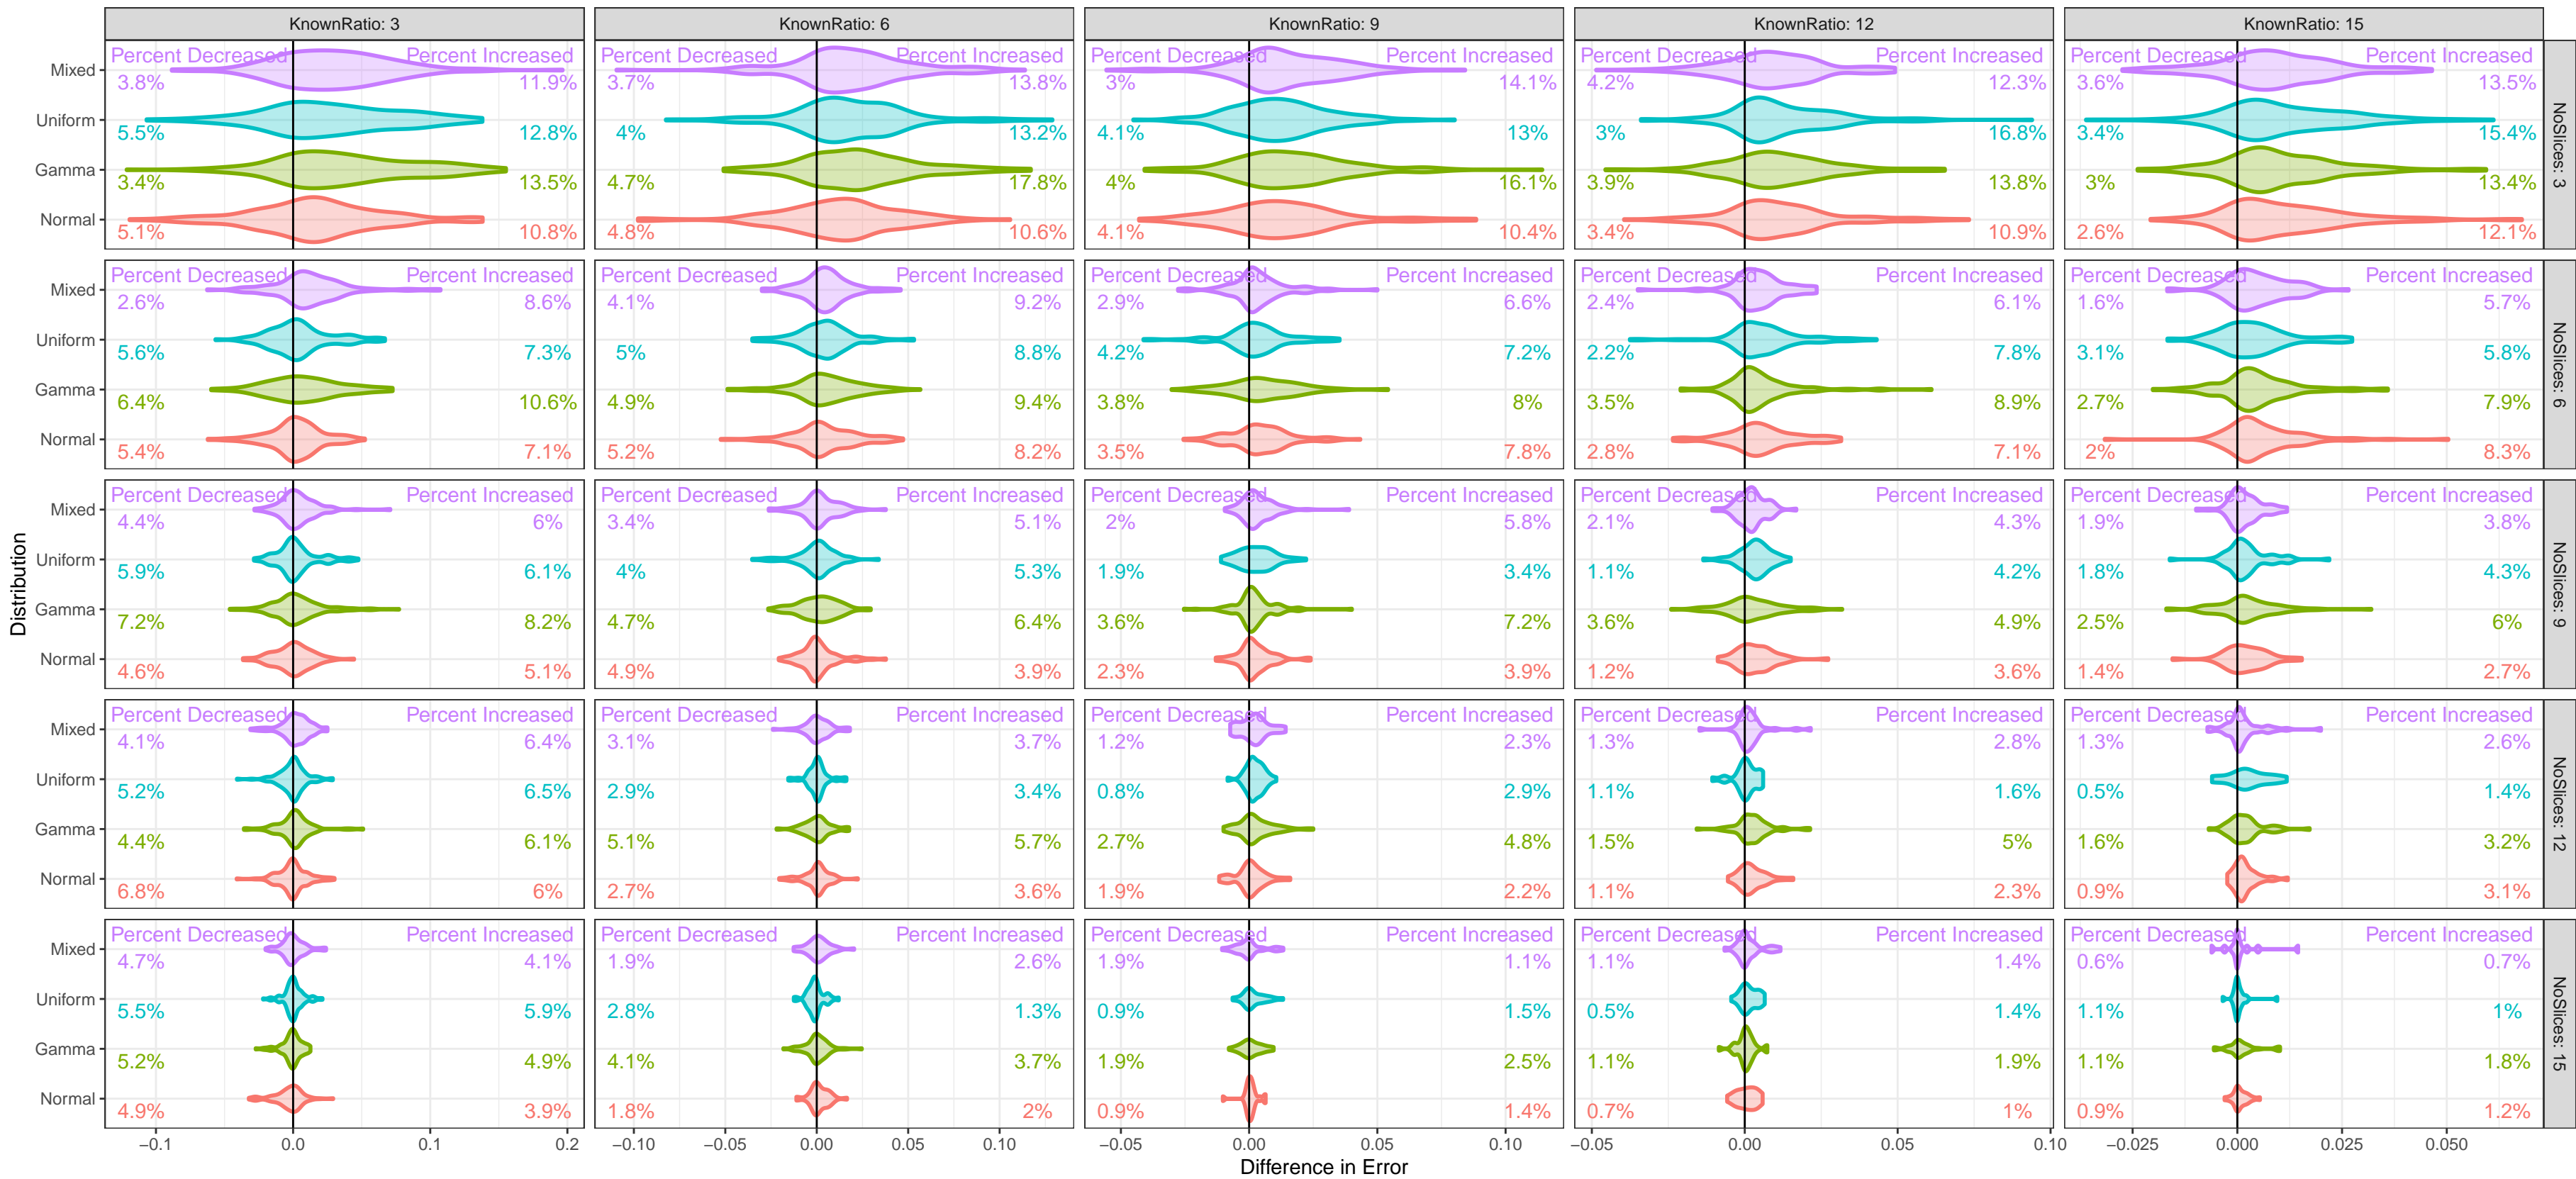

3 Response Levels, 5000 Total Samples

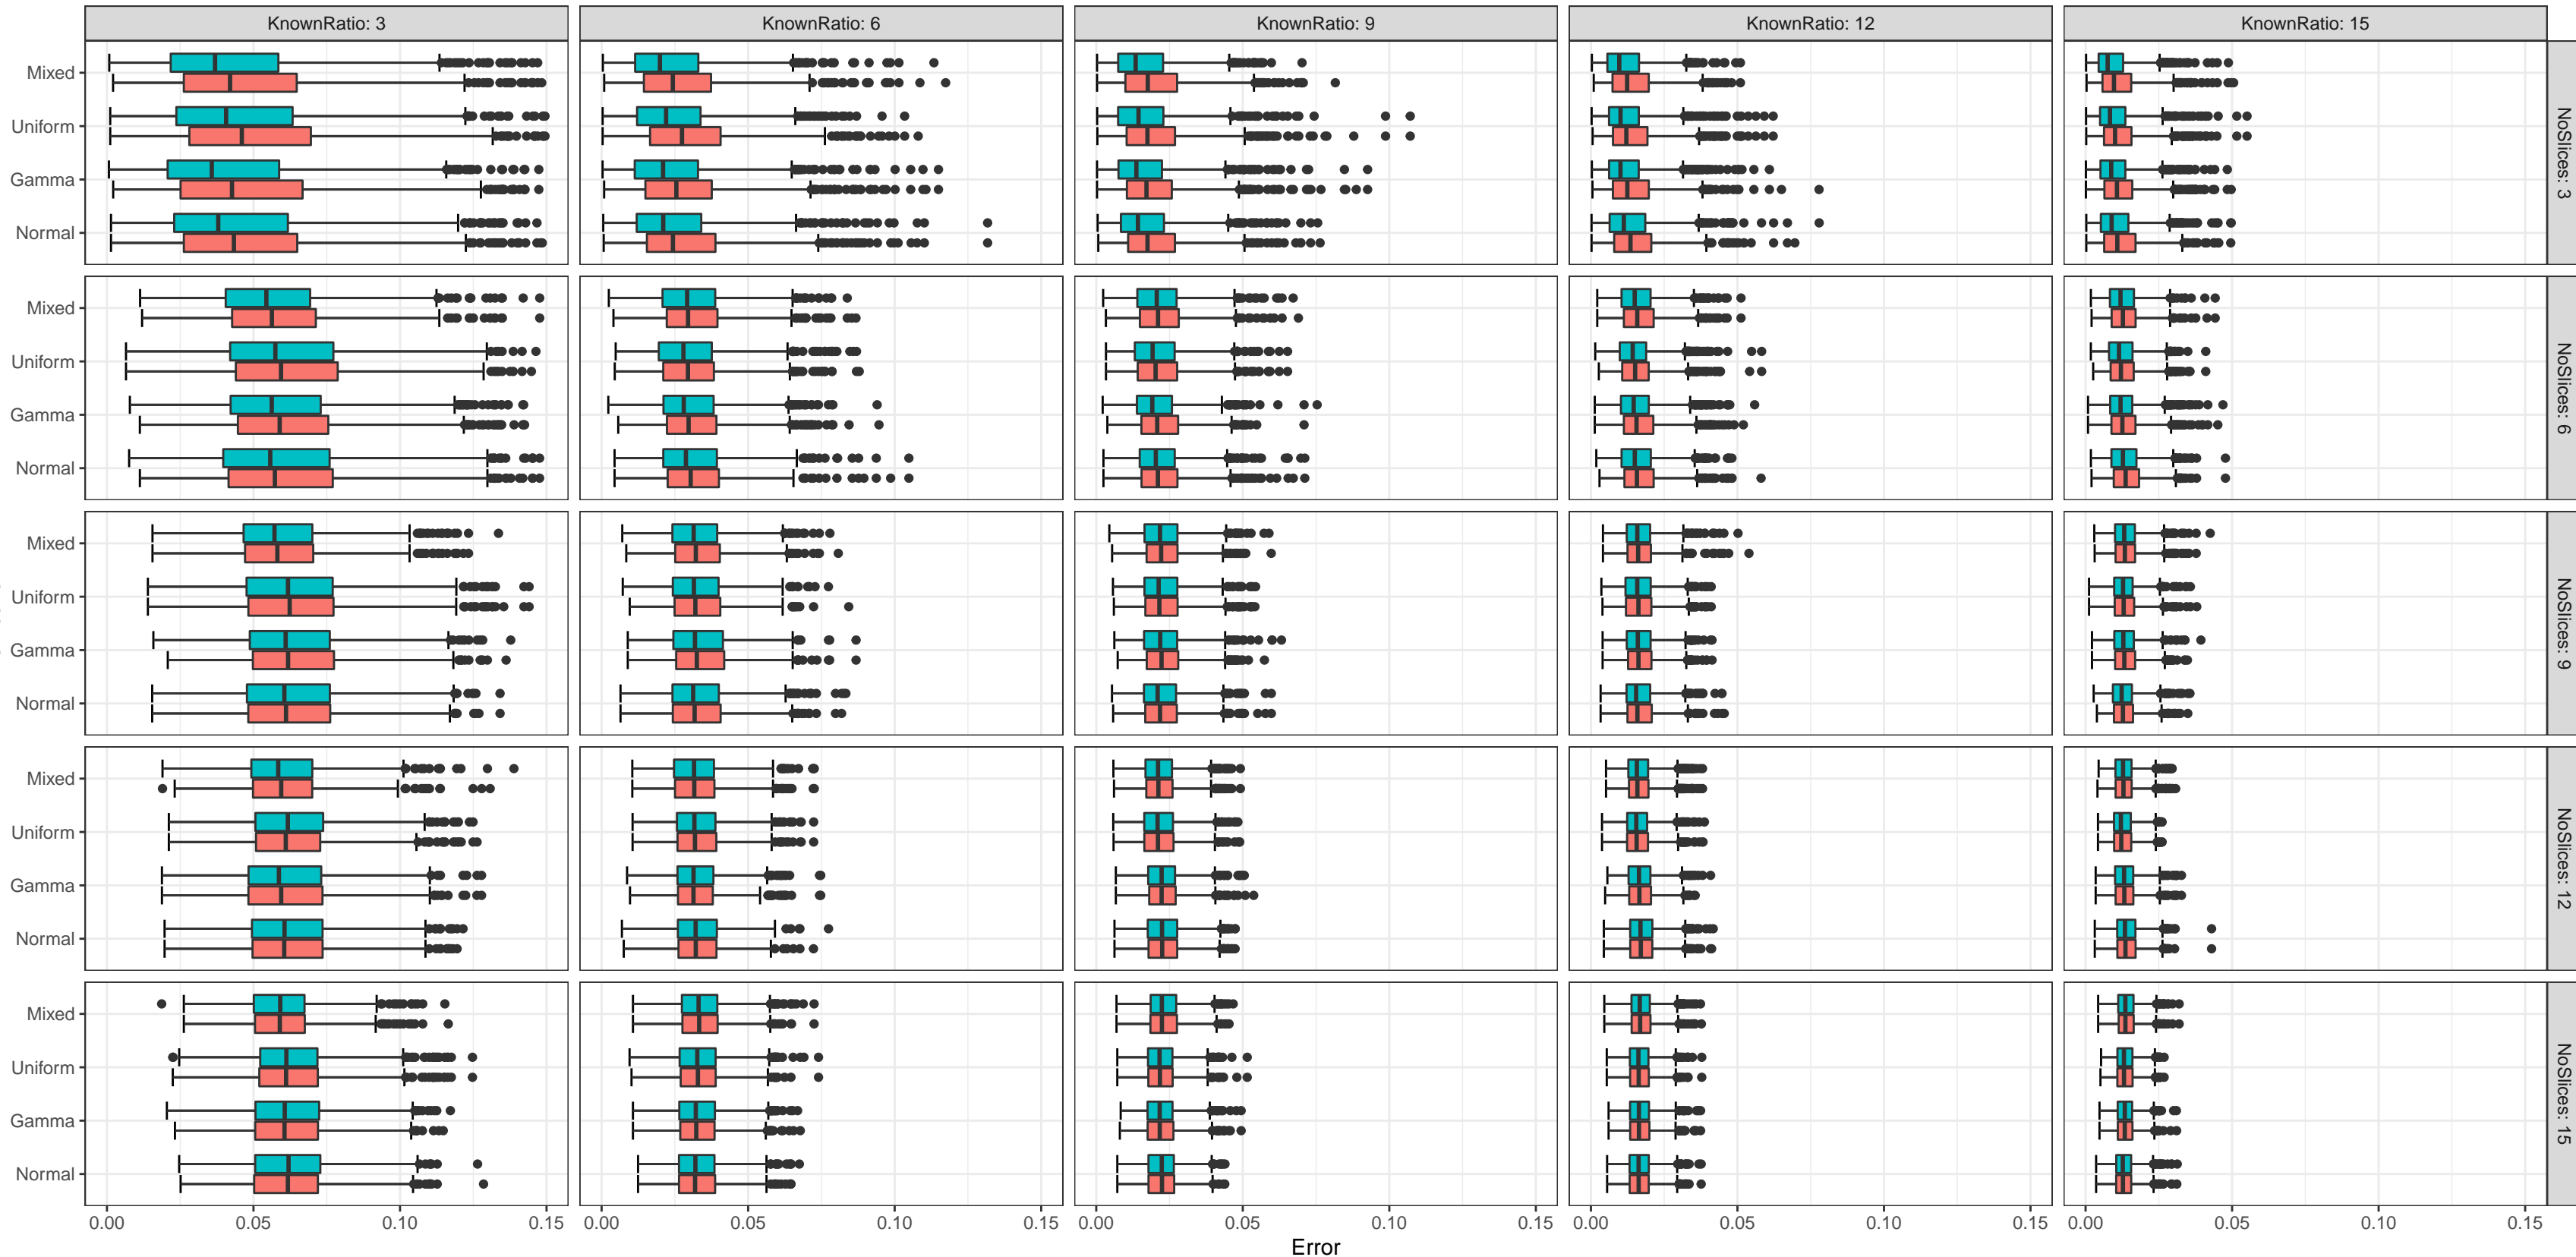

Method  
█ Ordinal  
█ GA

### 3 Response Levels, 5000 Total Samples

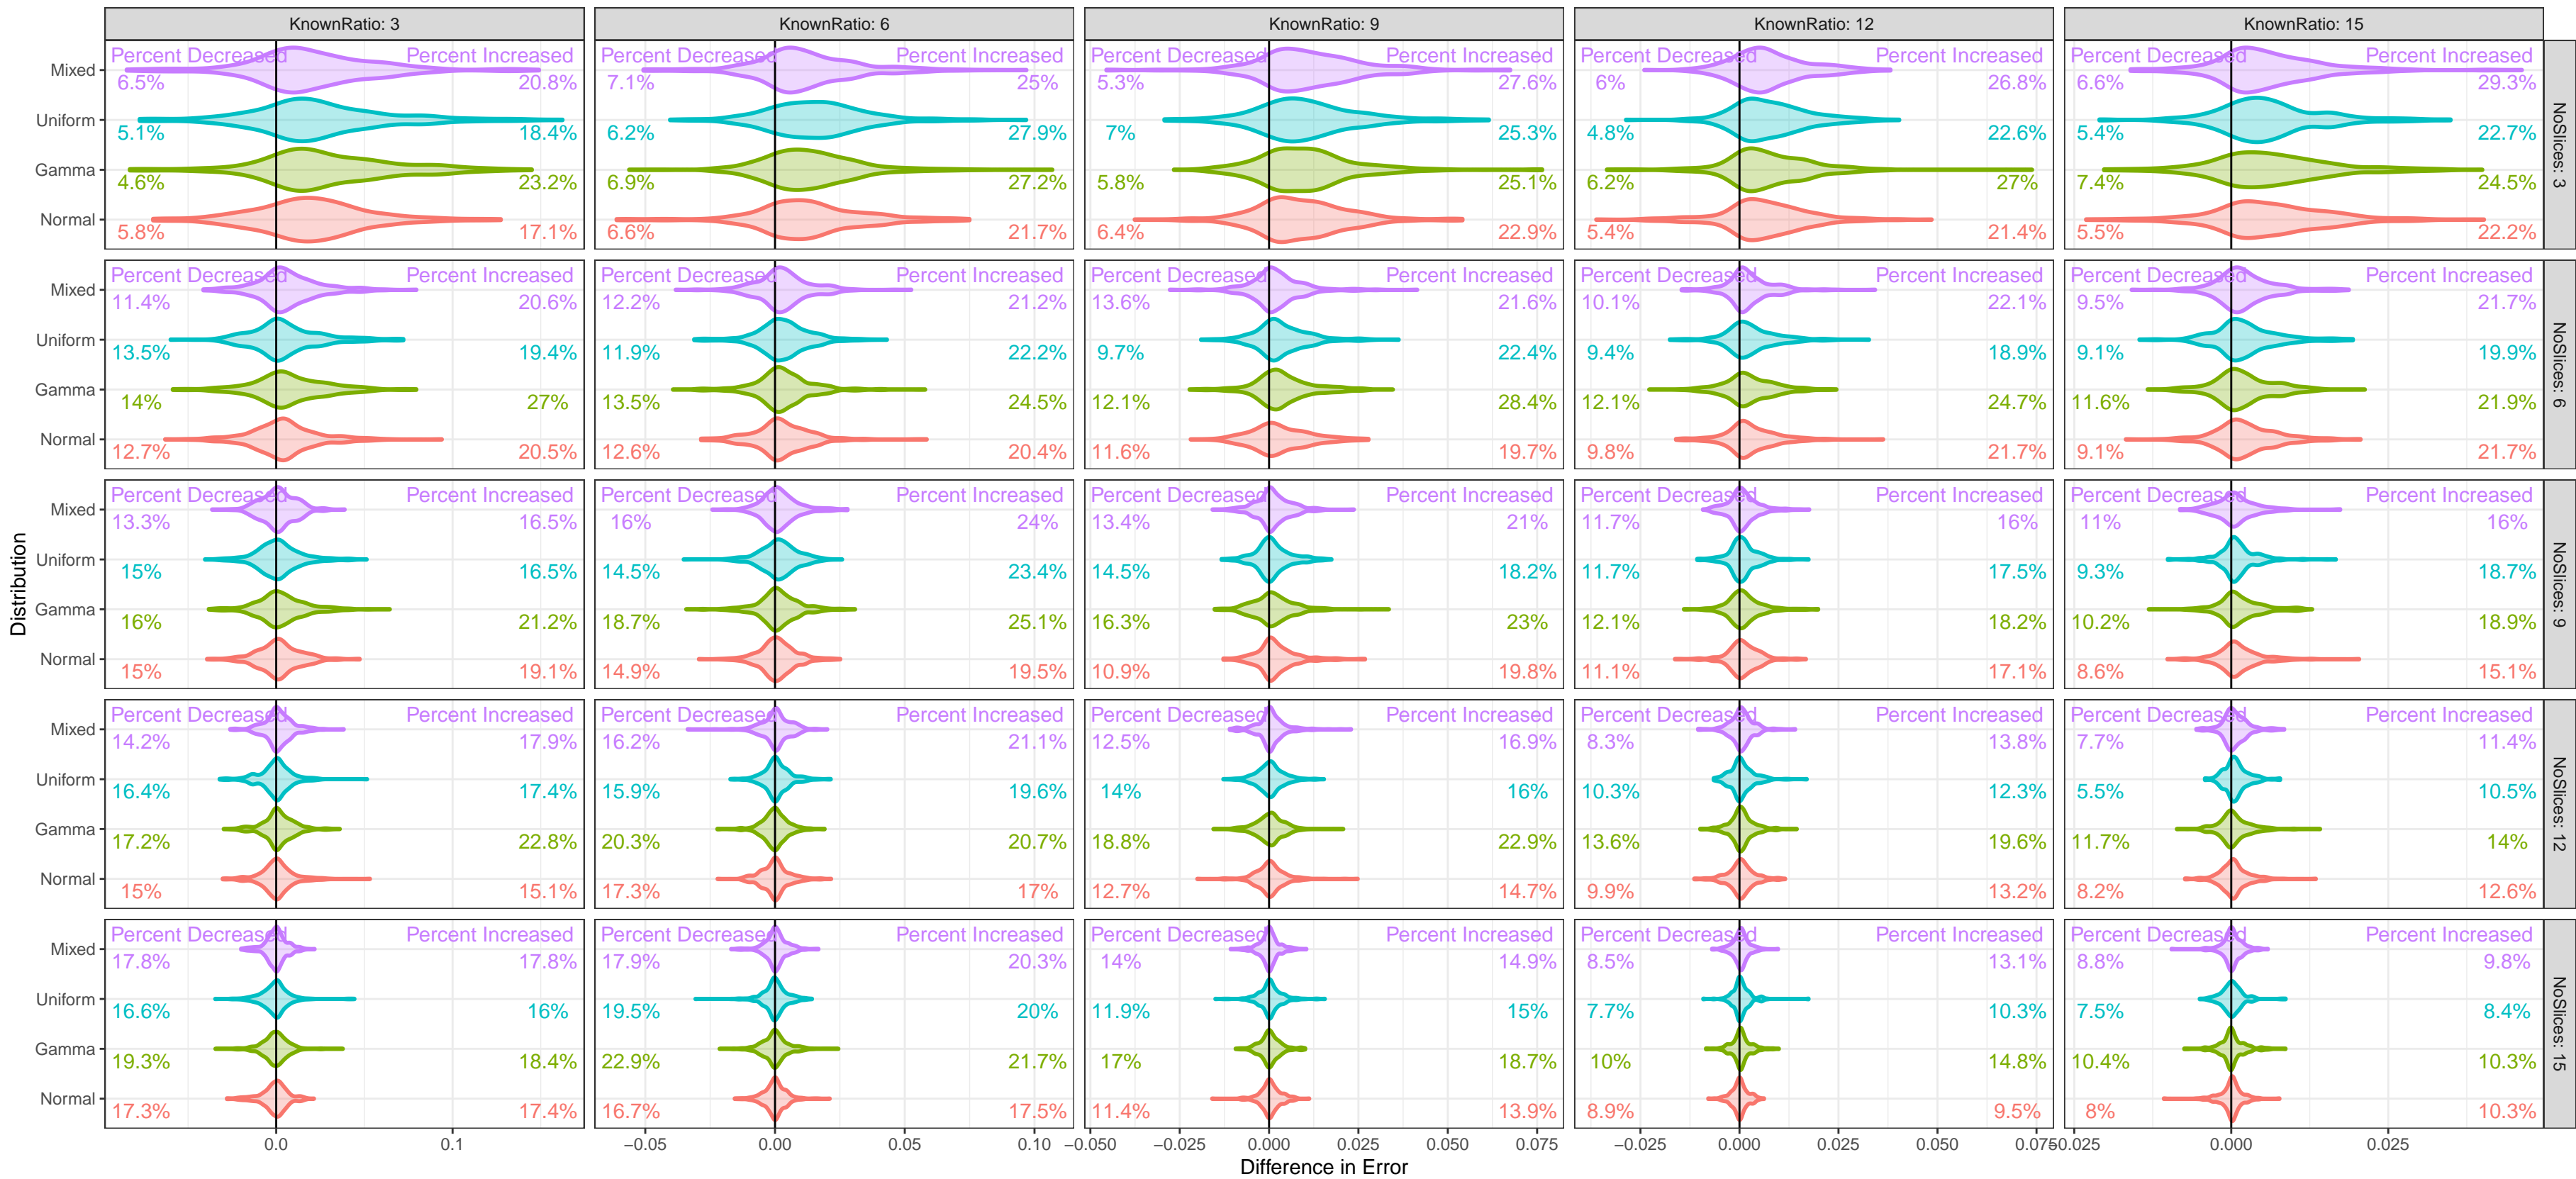



4 Response Levels, 5000 Total Samples

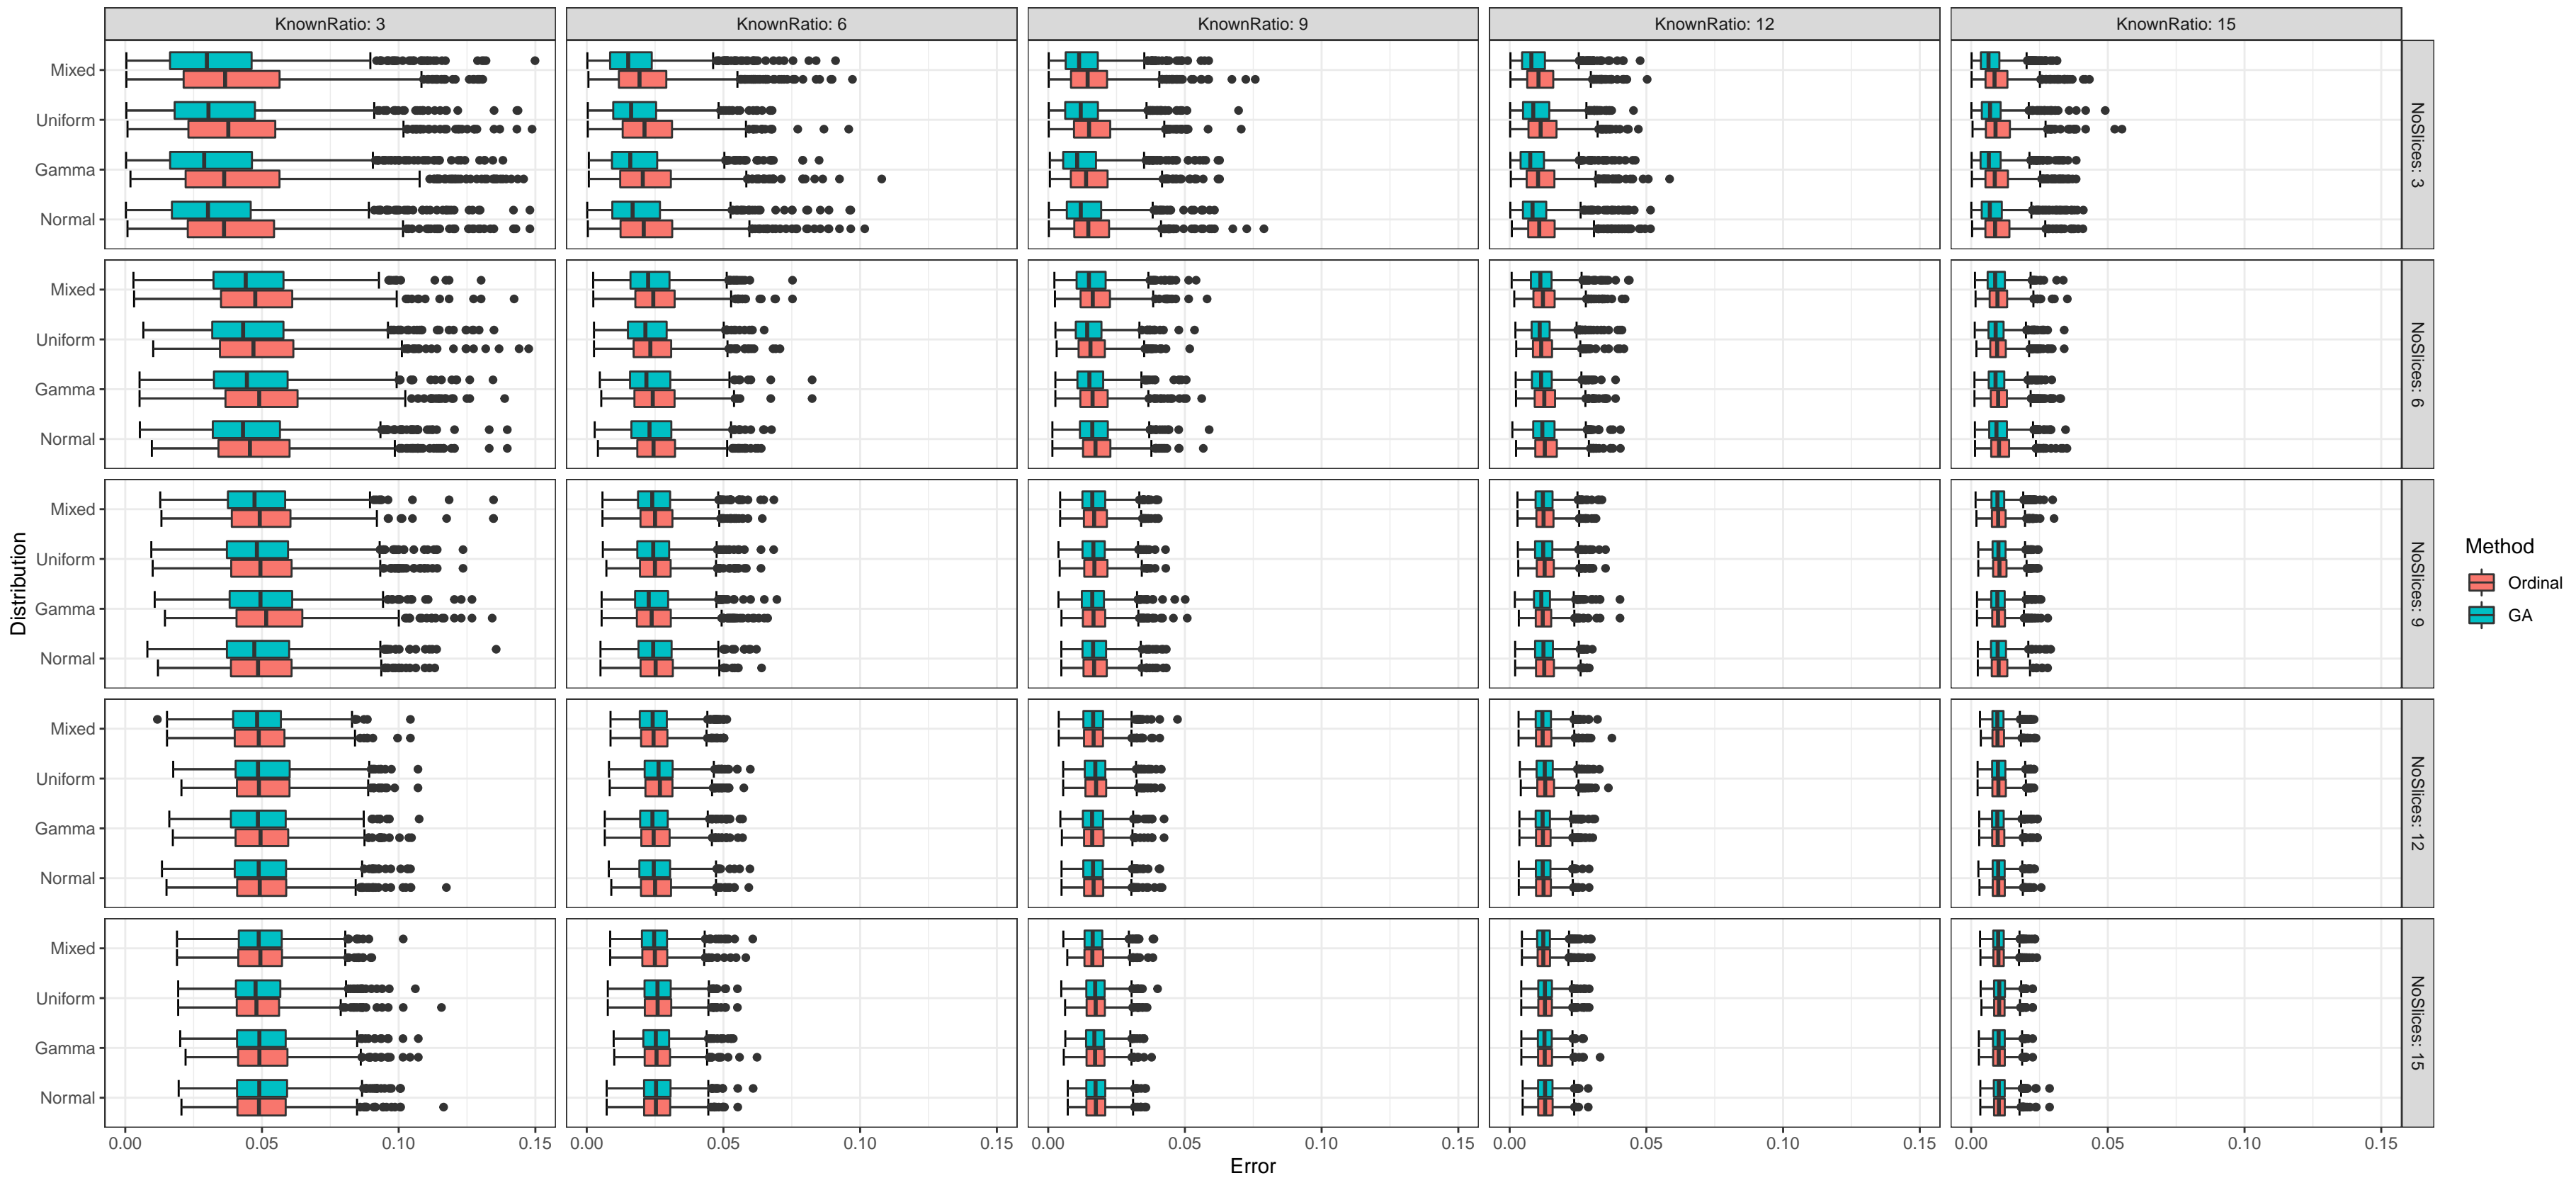

4 Response Levels, 5000 Total Samples

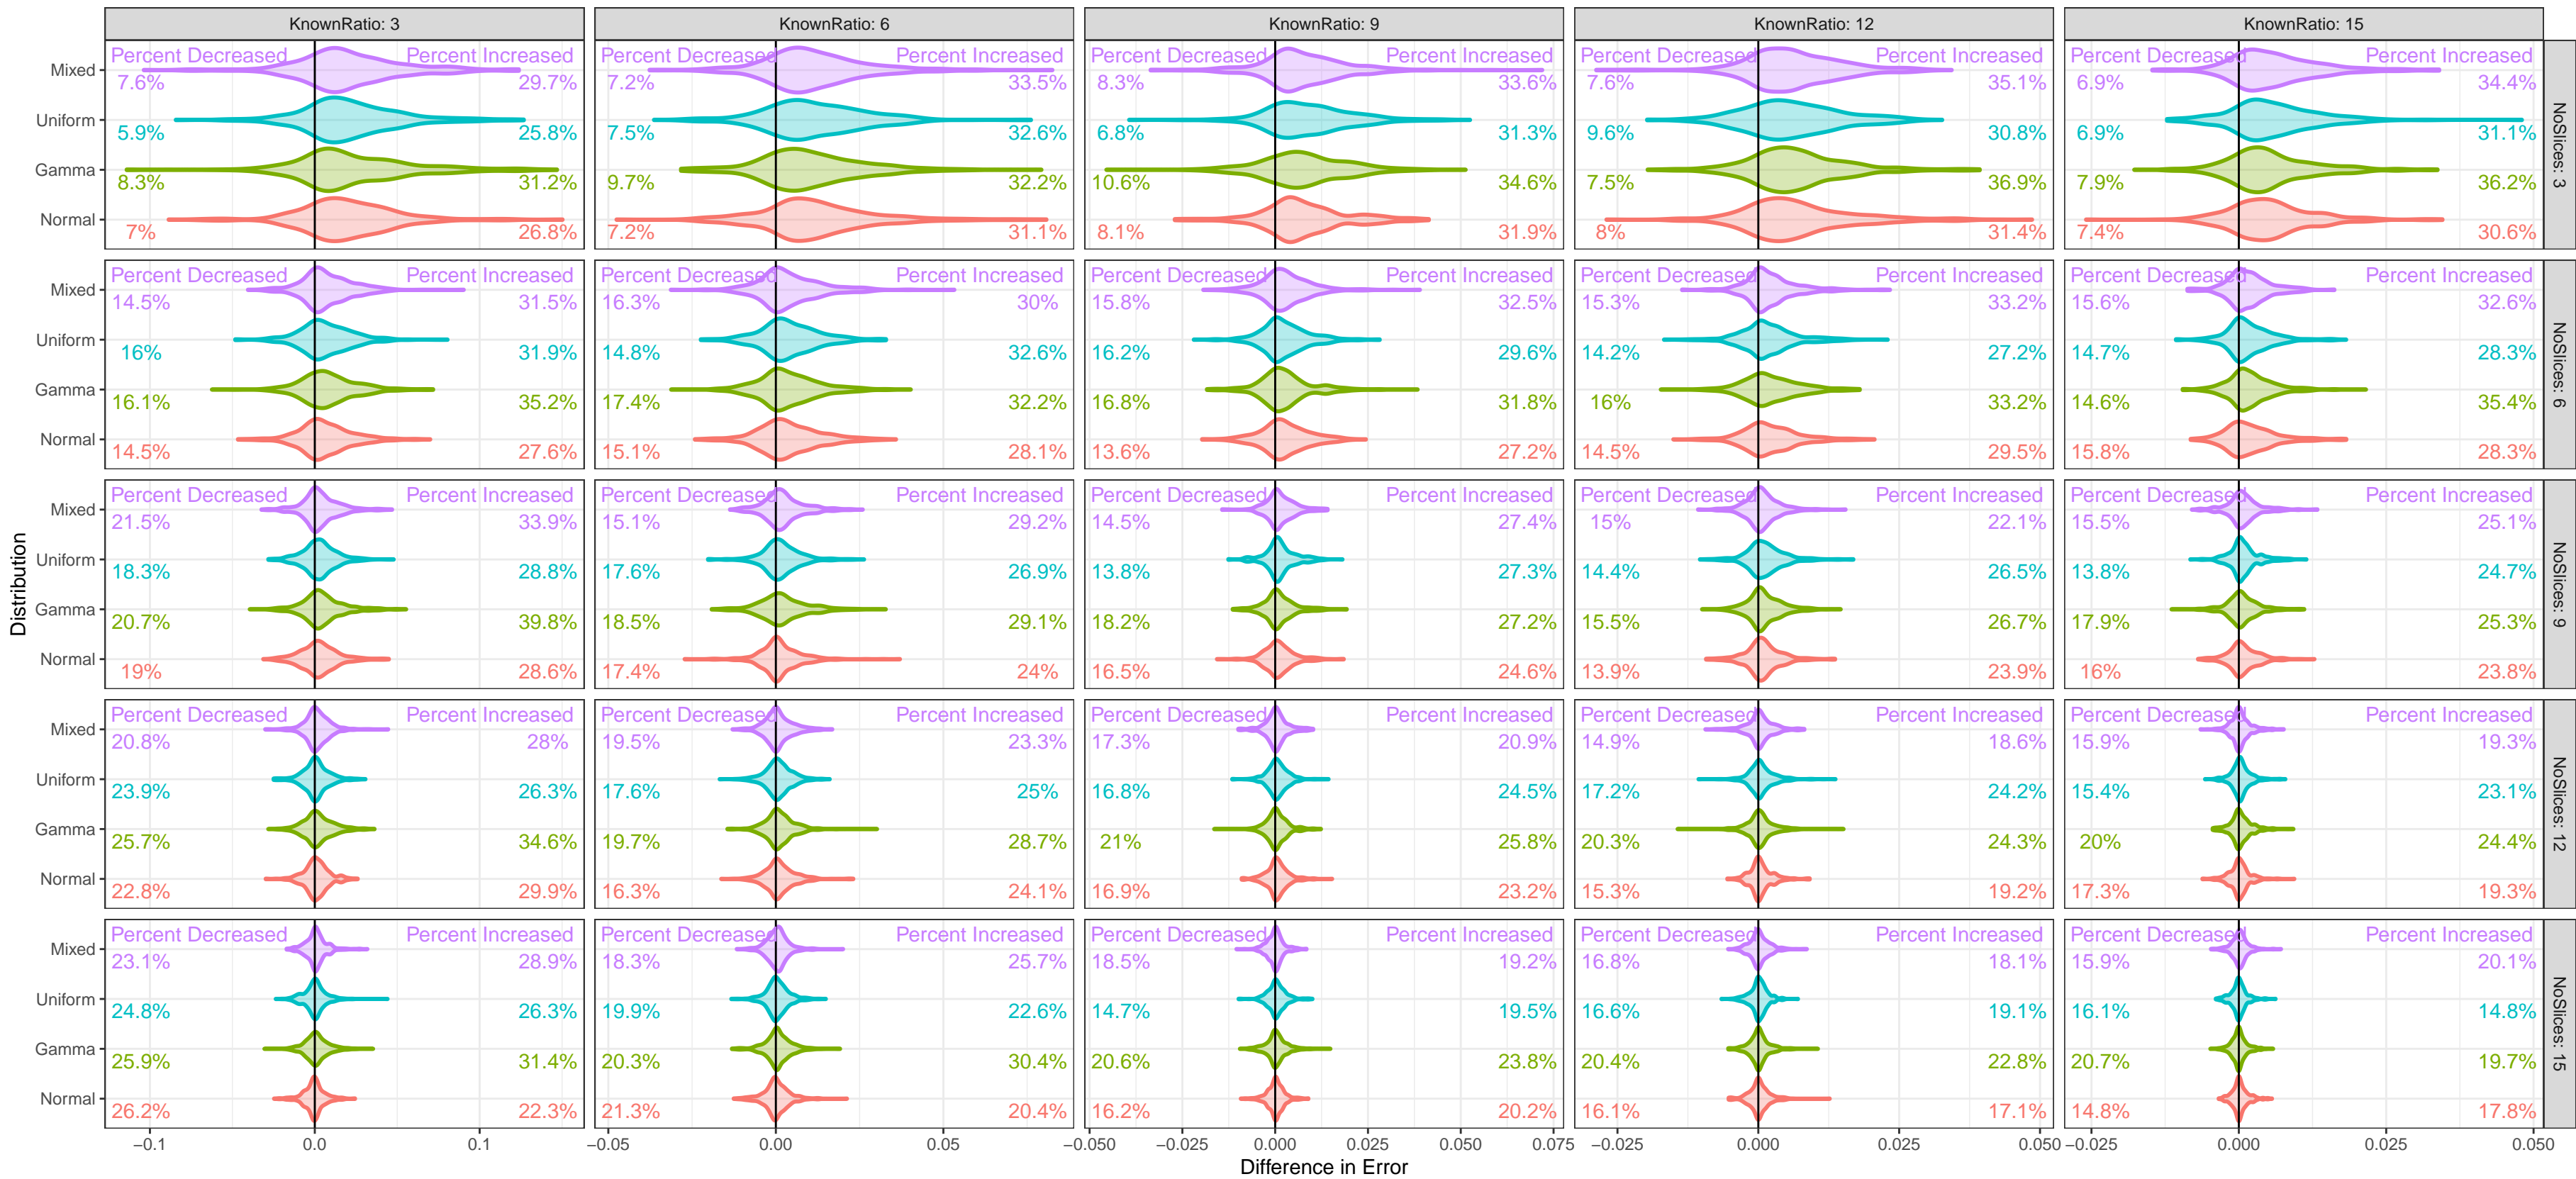

2 Response Levels, 10000 Total Samples

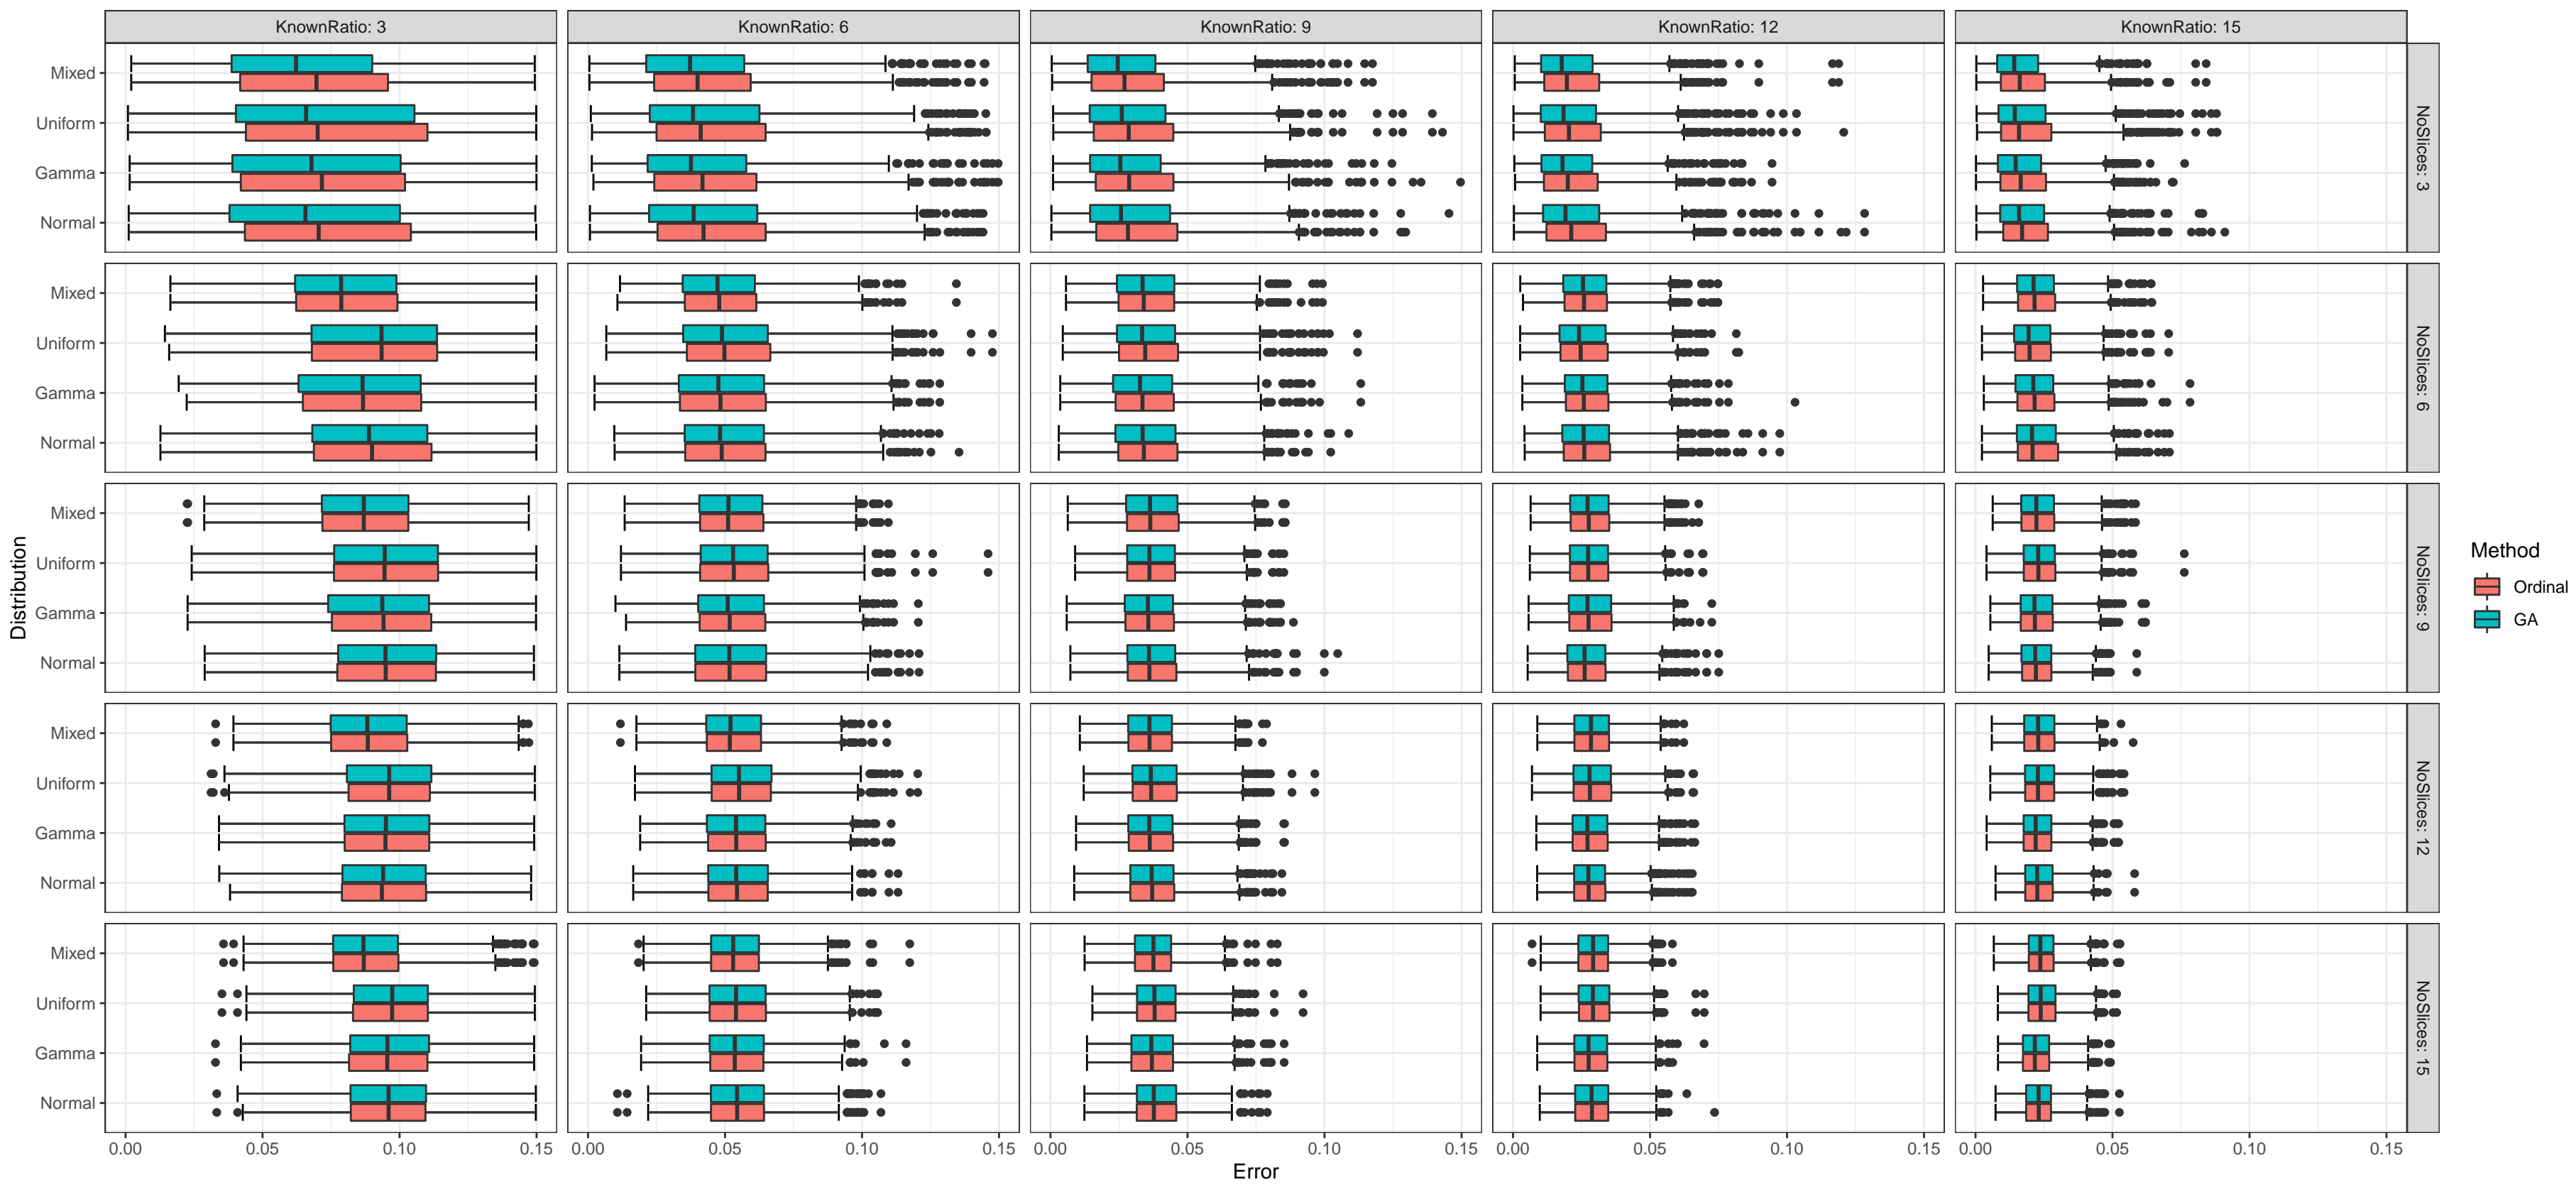

## 2 Response Levels, 10000 Total Samples

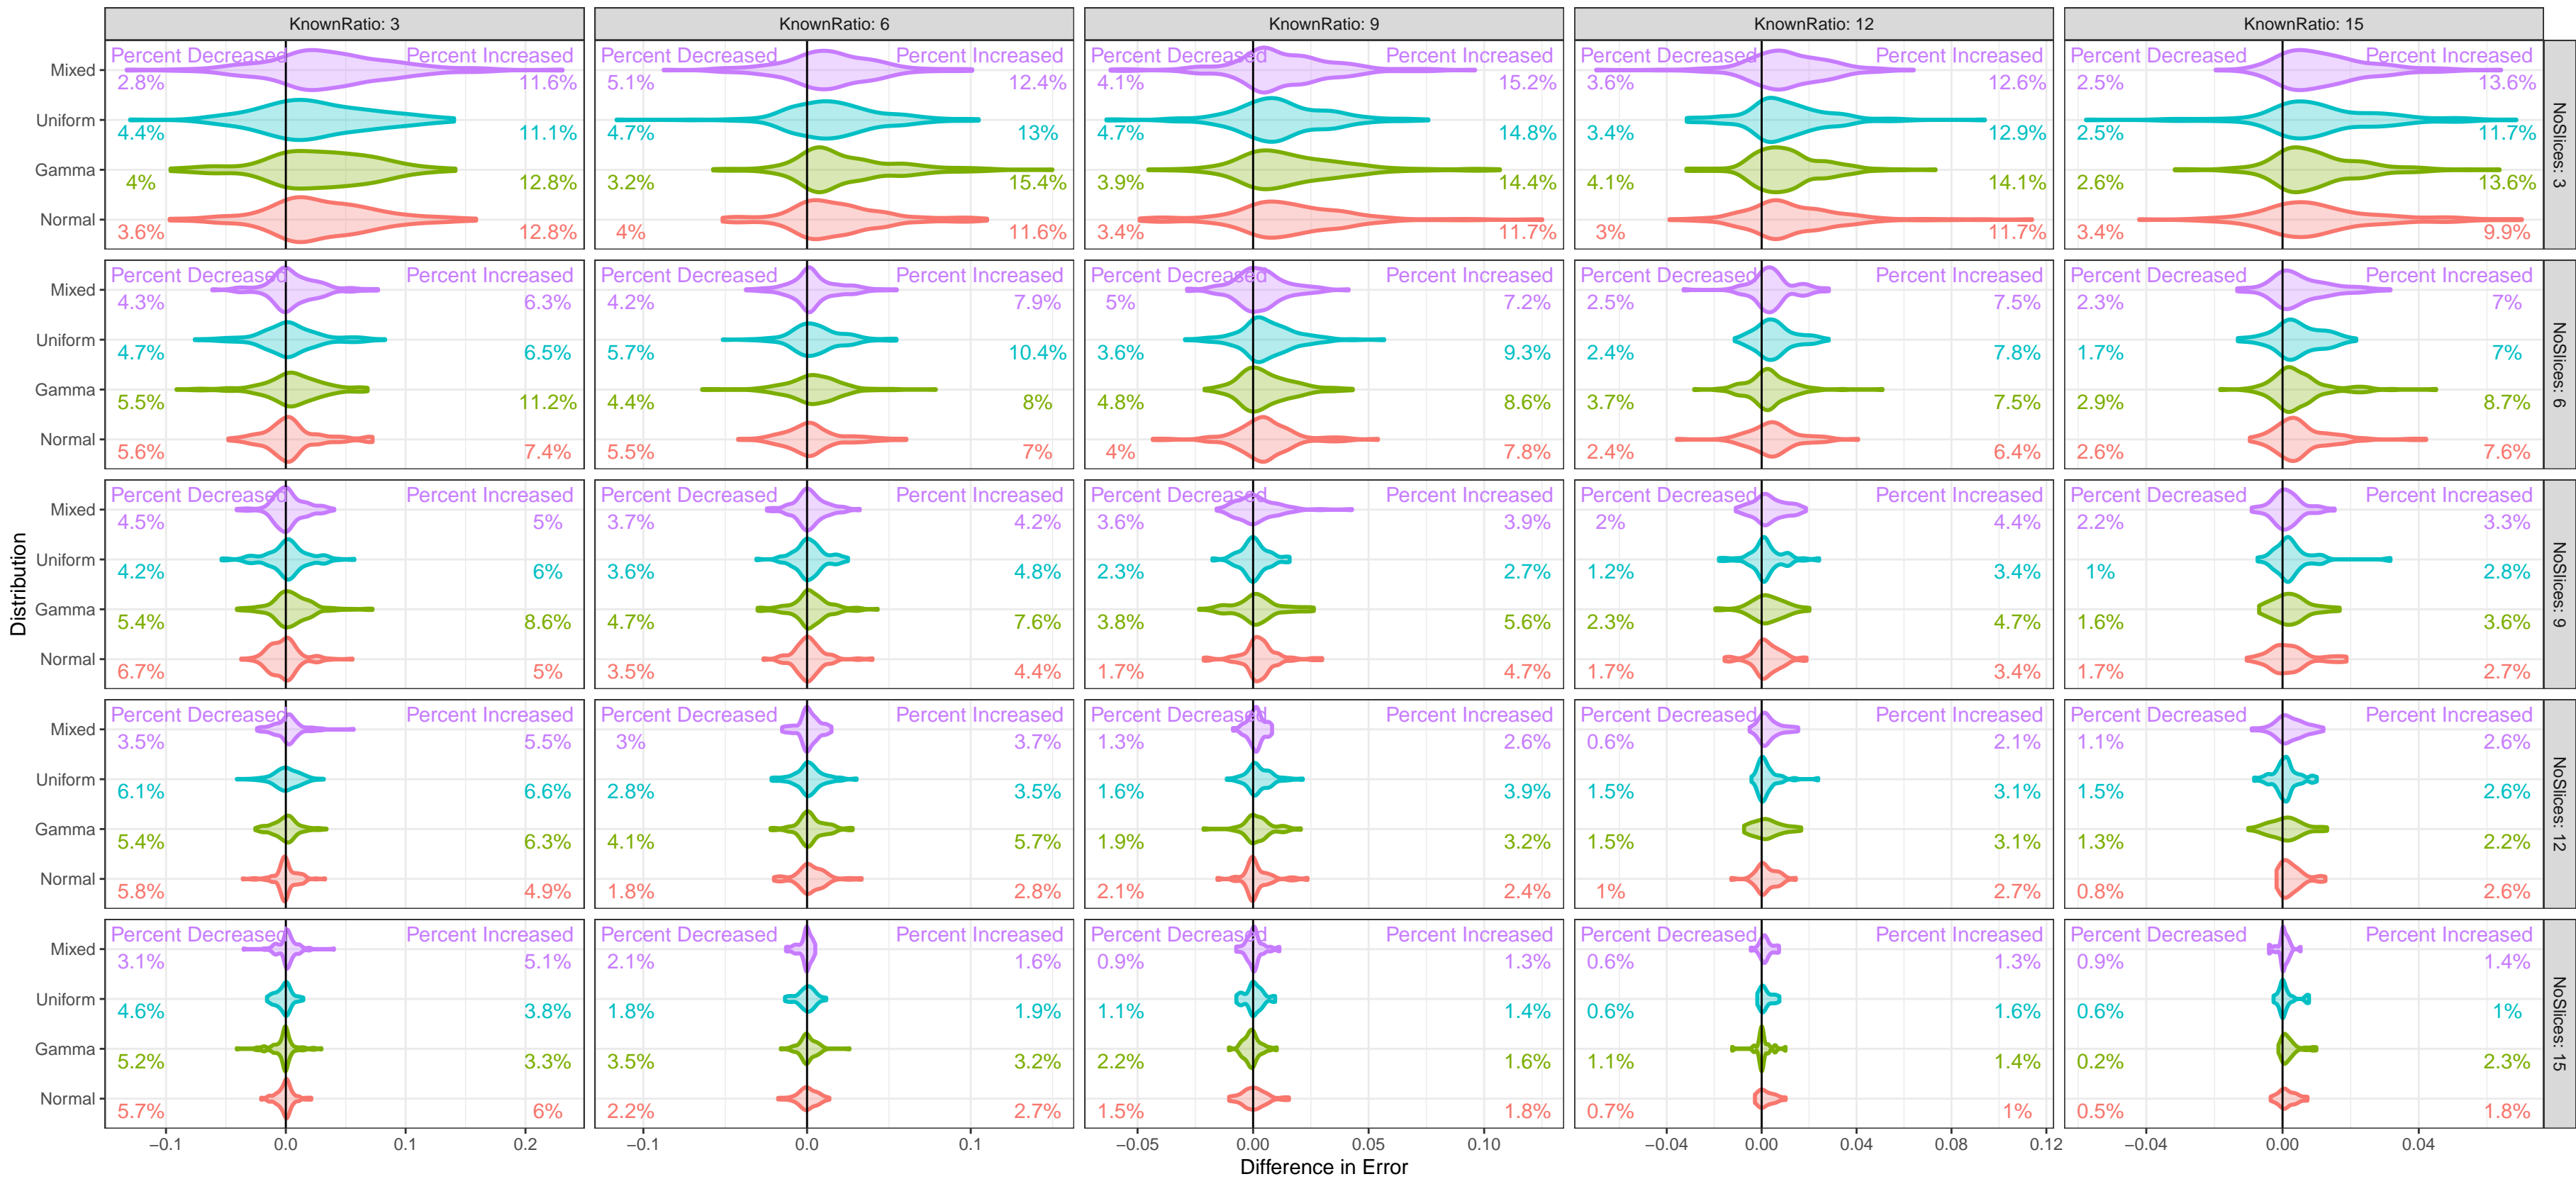

3 Response Levels, 10000 Total Samples

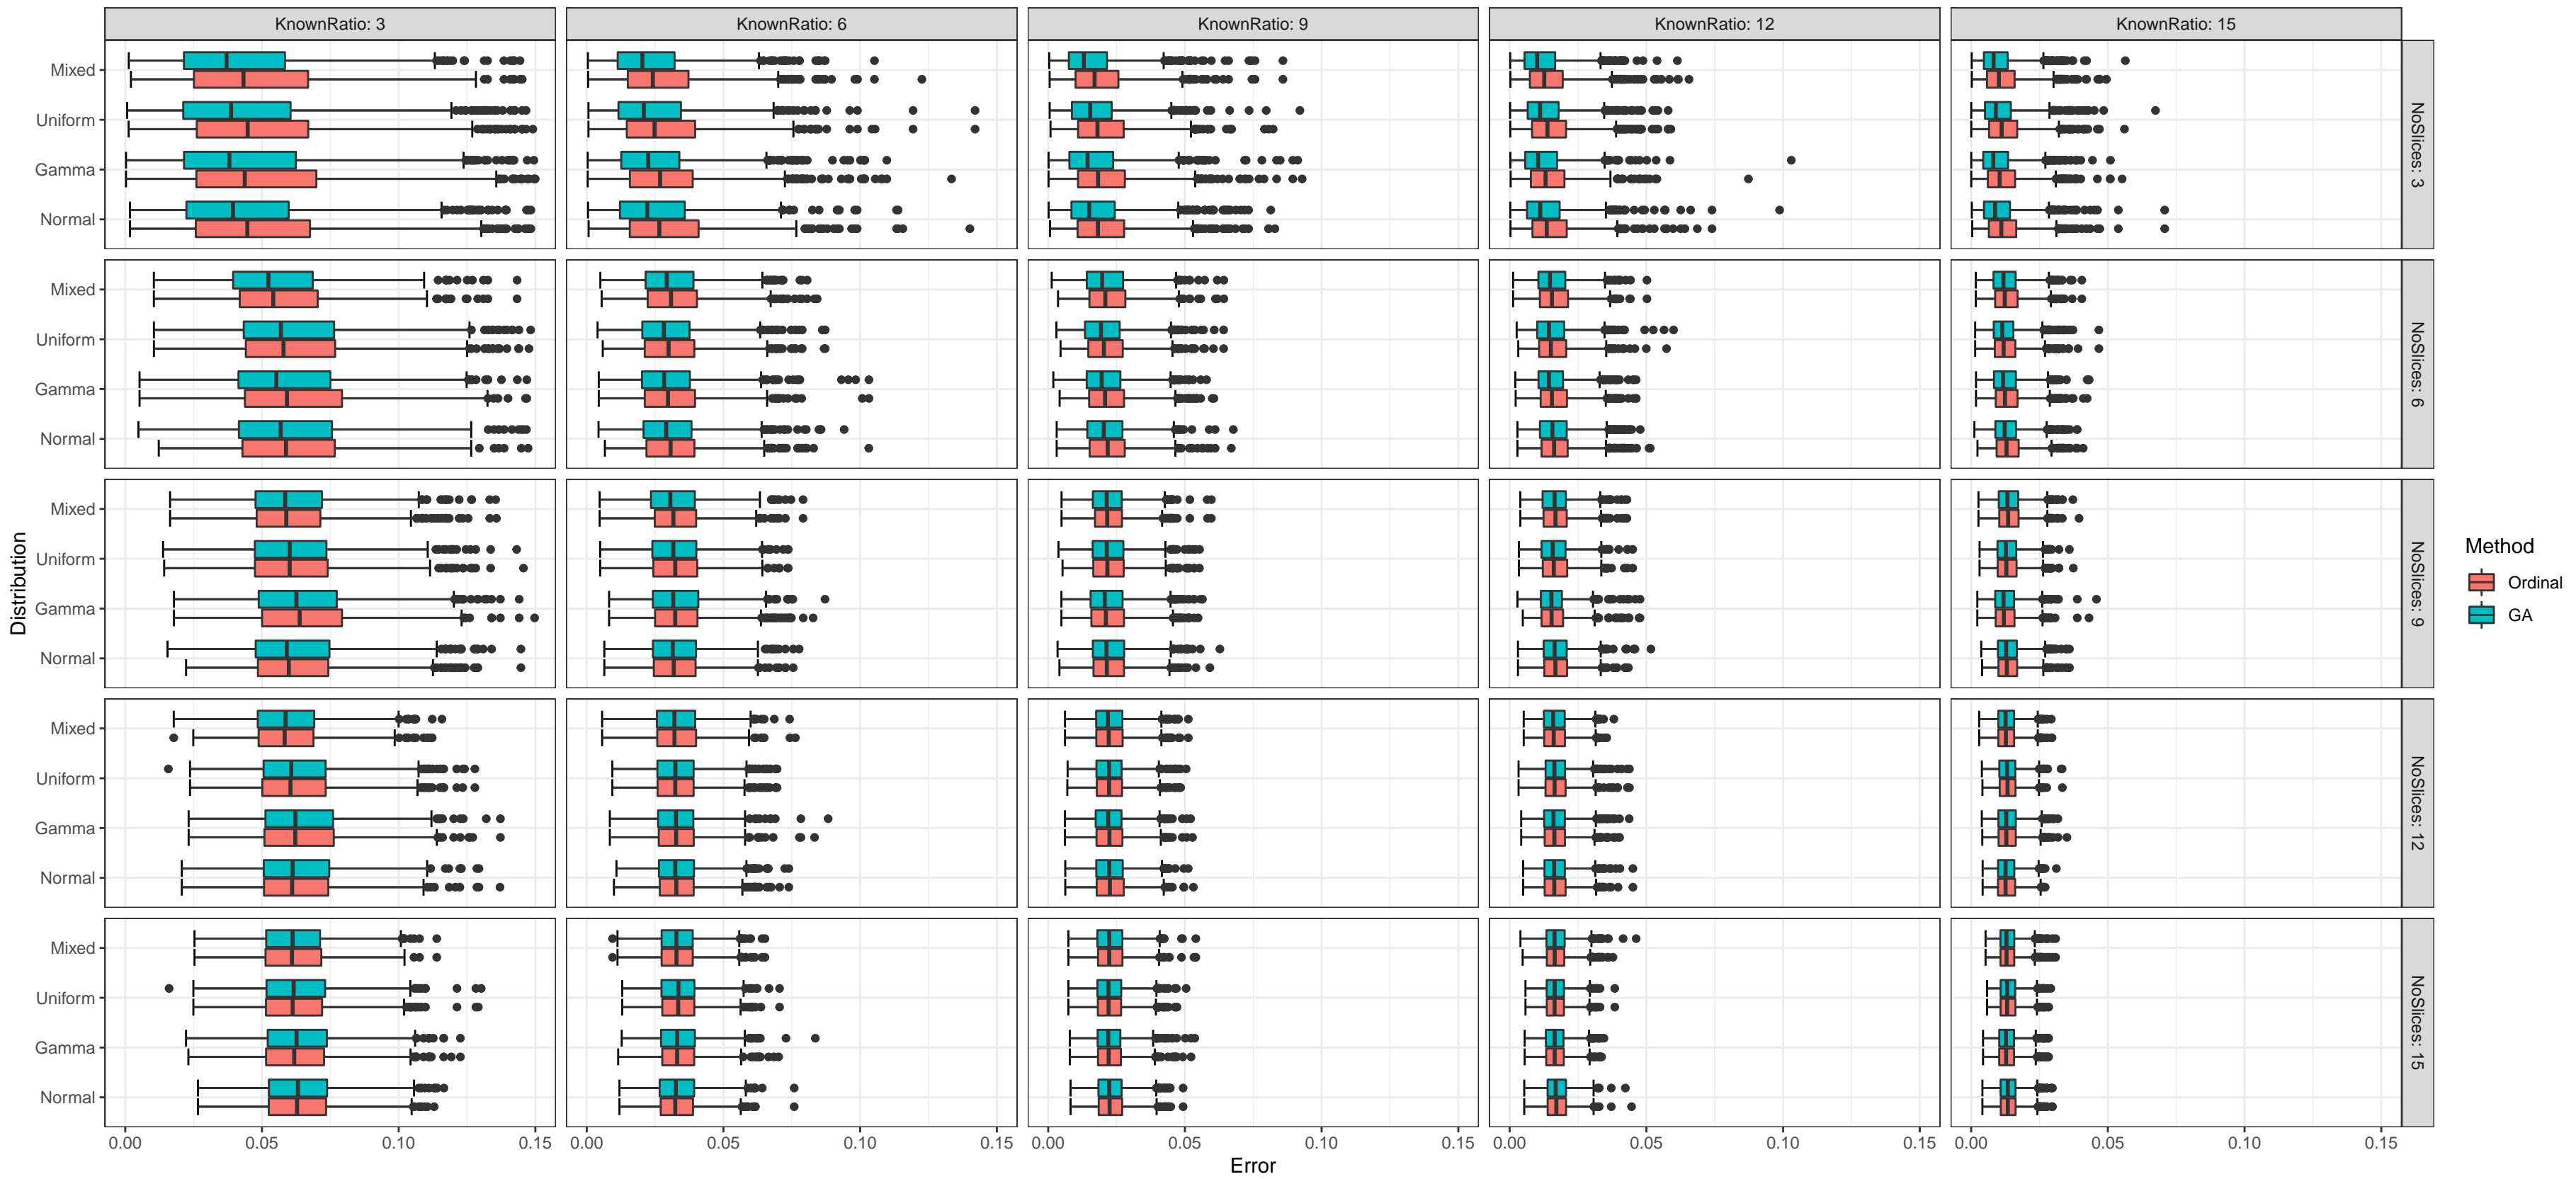

### 3 Response Levels, 10000 Total Samples

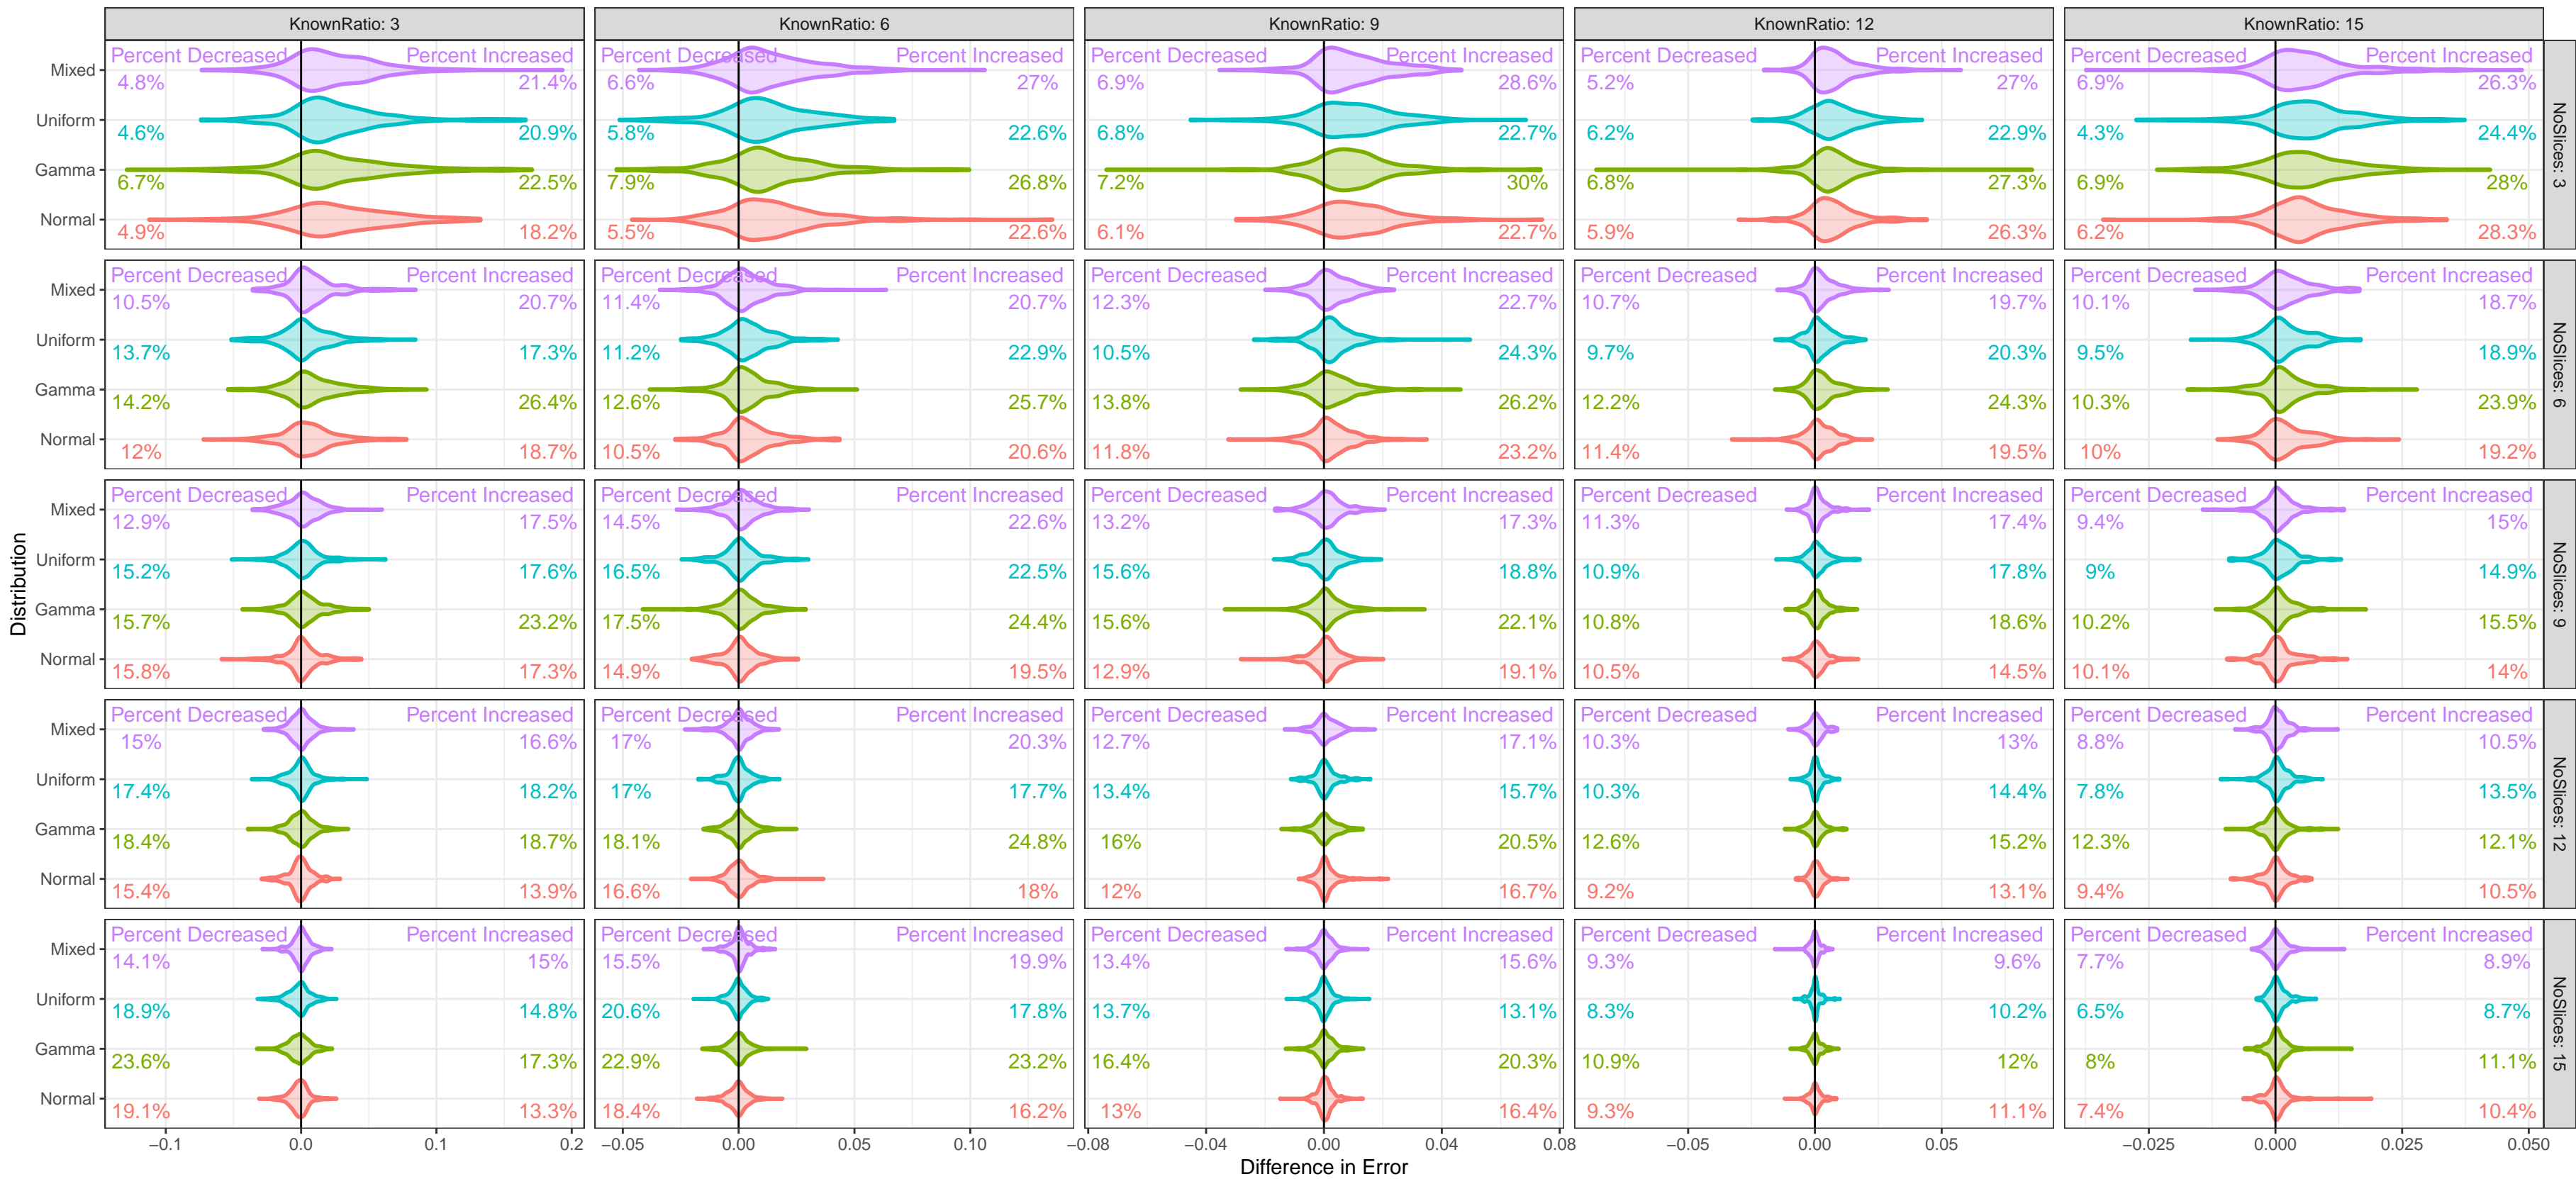

4 Response Levels, 10000 Total Samples

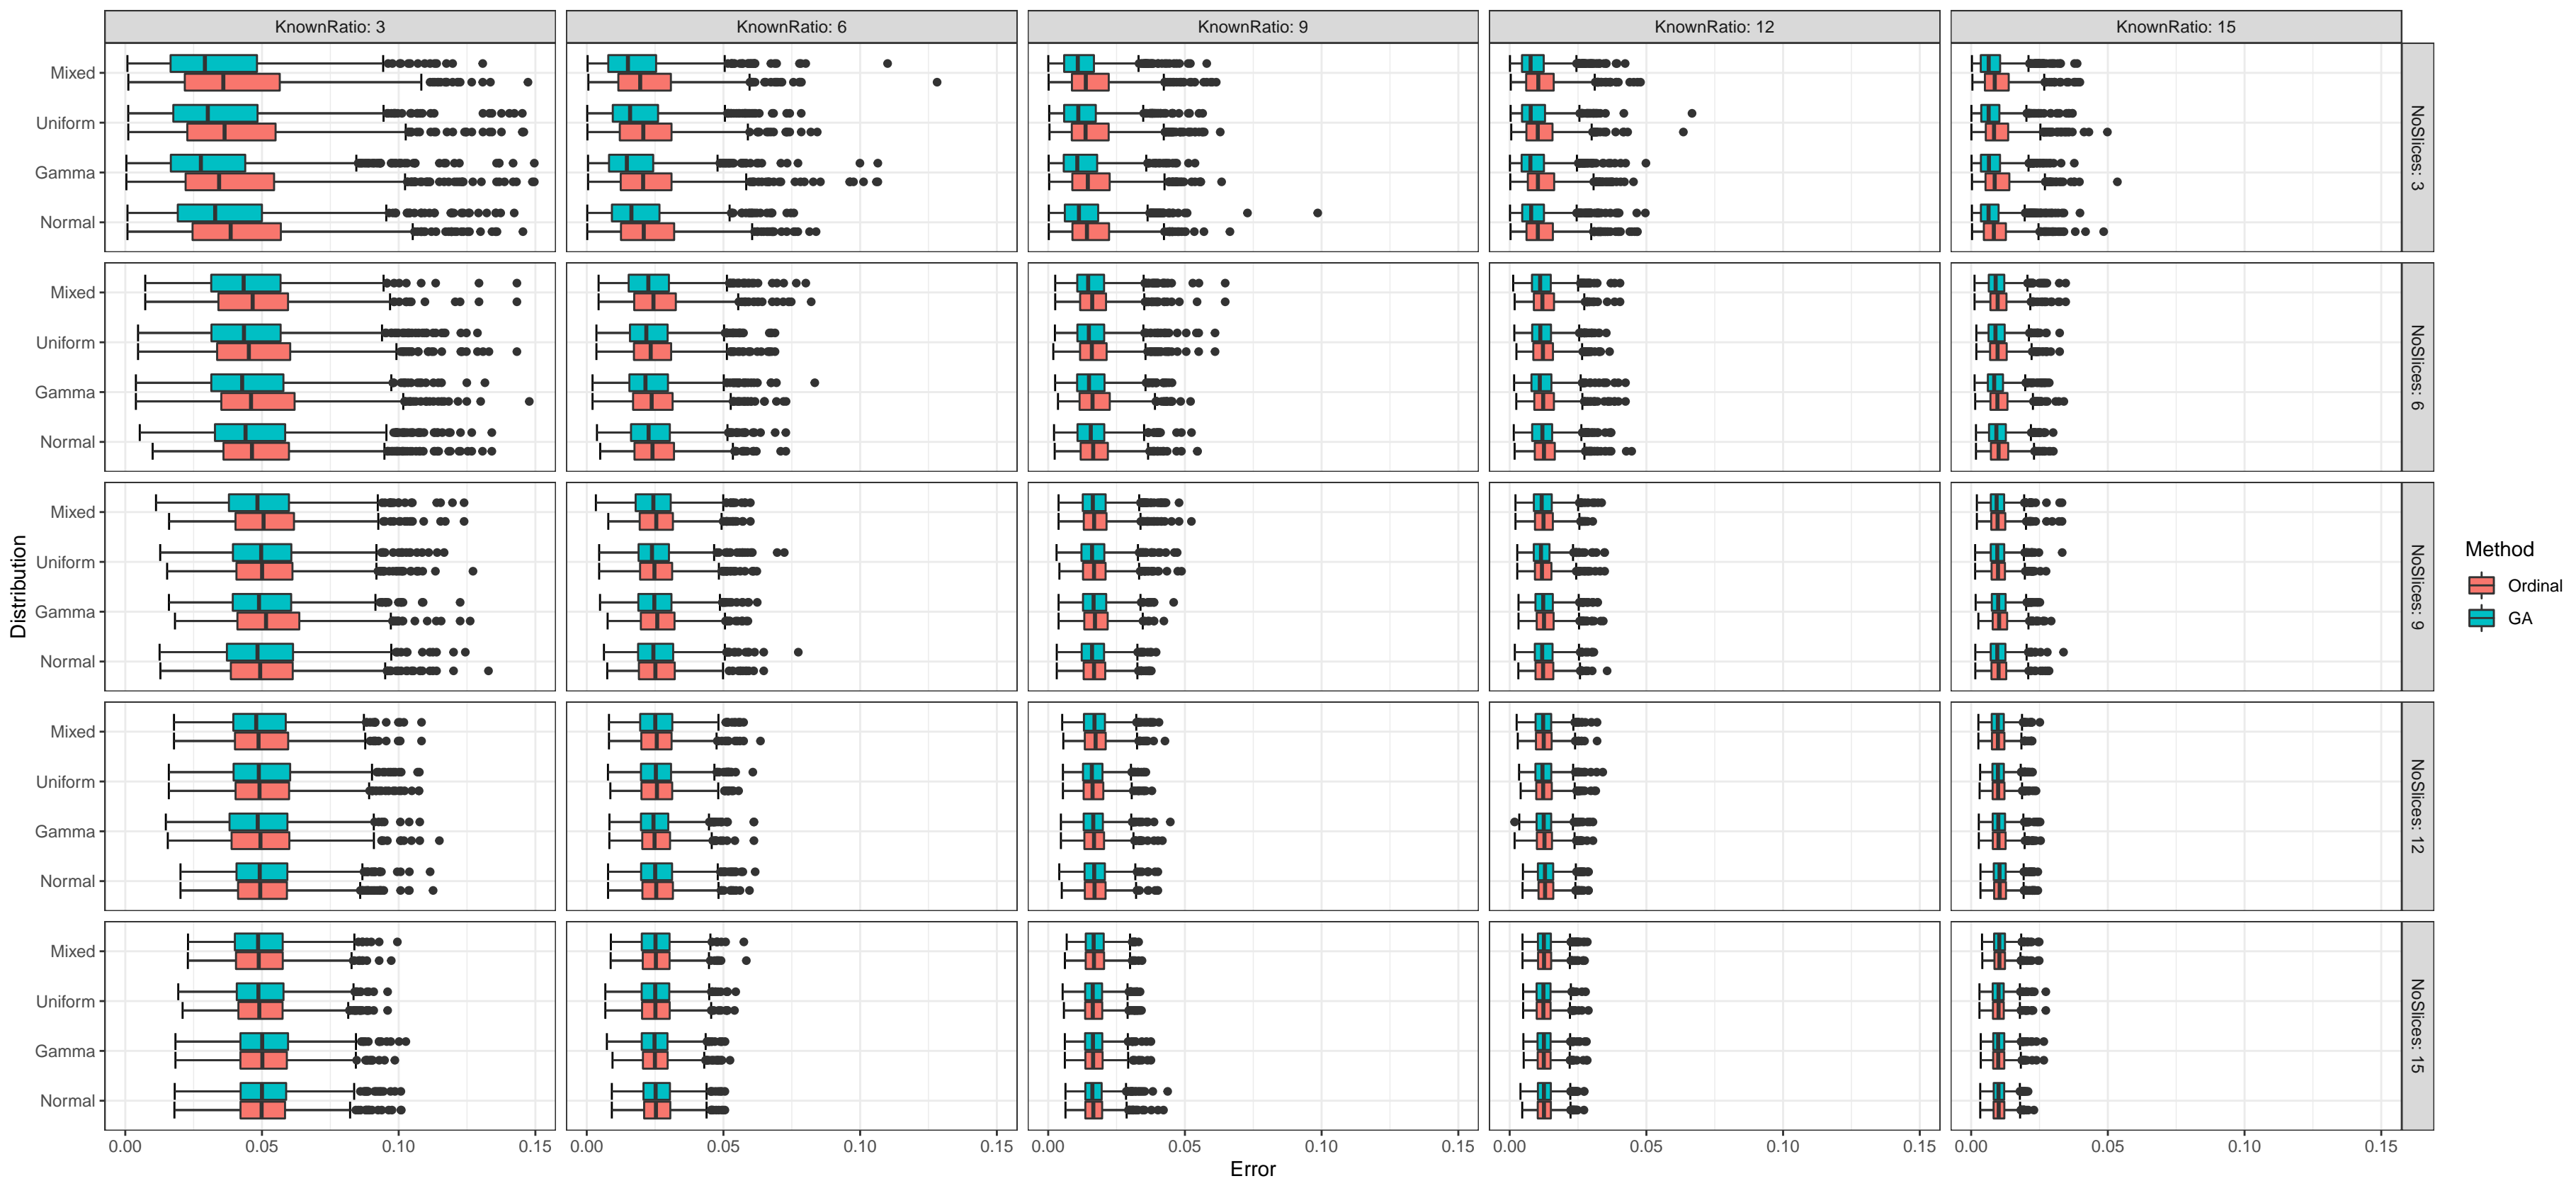

Method  
█ Ordinal  
█ GA

4 Response Levels, 10000 Total Samples

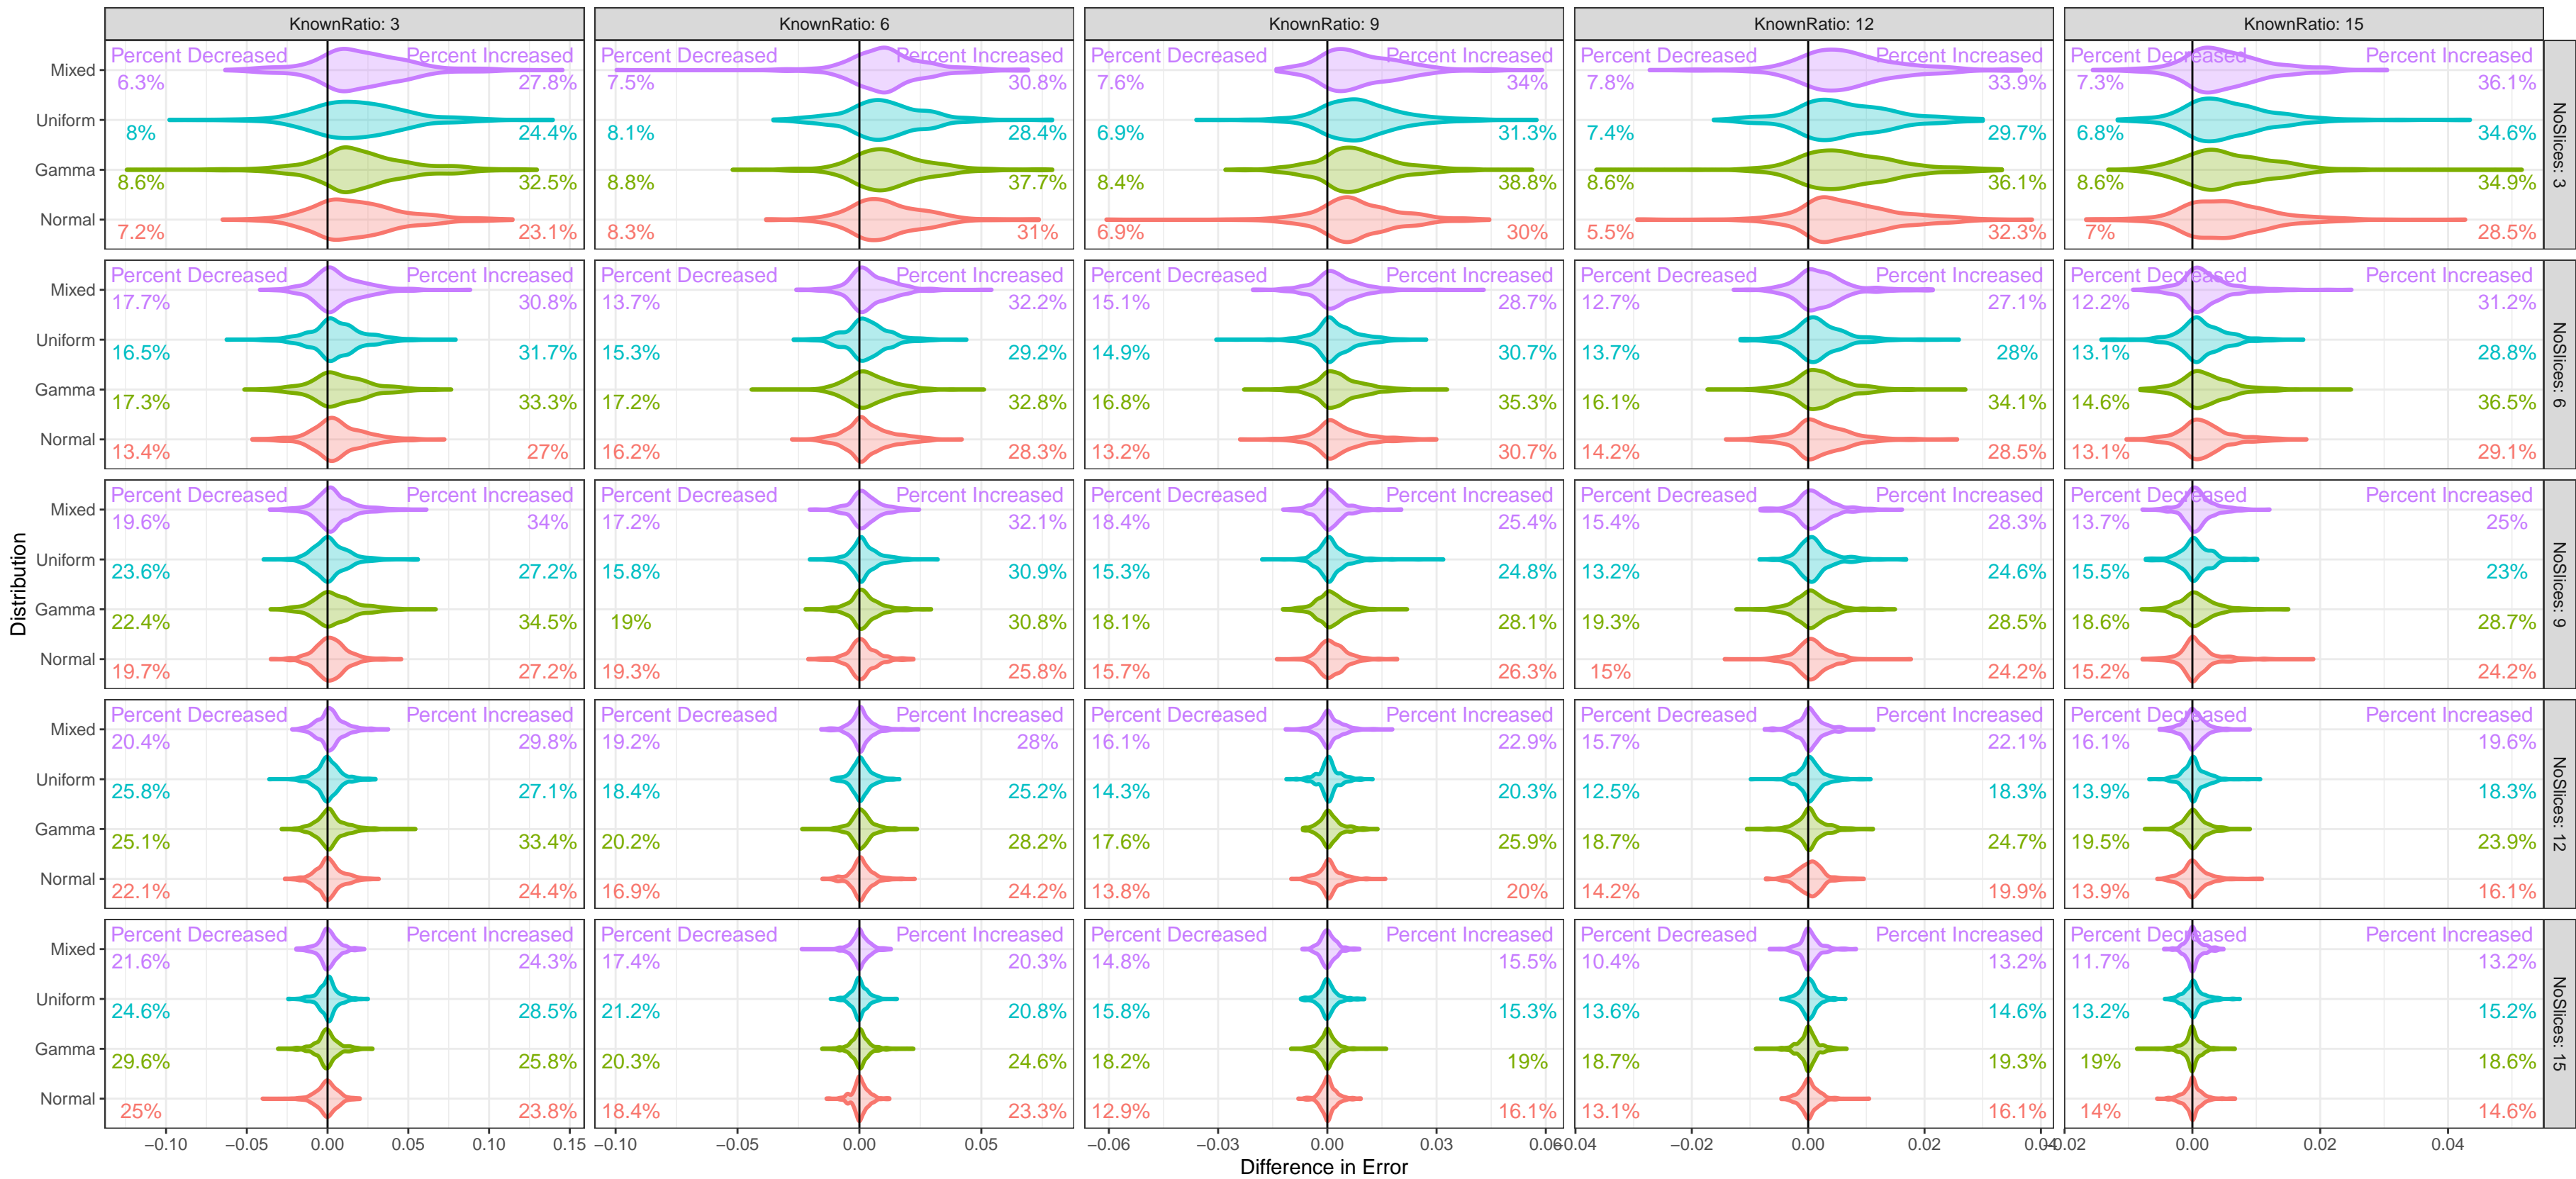

Supplement: NIHMS1954597-supplement-2.pdf [file NIHMS1954597-supplement-2.pdf]
